# Supplementary material for: Search for New Candidate Genes Involved in the Comorbidity of Asthma and Hypertension Based on Automatic Analysis of Scientific Literature
Source: publisher site journal article supplement (doi:10.1515/jib-2018-0054), 2018-12-01
Supplement: Supplementary file 1 [file Appendix_1.xlsx]

## Sheet: Ranks
GeneSymbol	GeneID	Criterion 1	Criterion 2	Criterion 3	Criterion 4 A	Criterion 4 B	Average of criteria 1-4	Dynamics of interest in publications
		ToppGene	Endeavour	GO BP	Gene CTC	Protein CTC		1990	1991	1992	1993	1994	1995	1996	1997	1998	1999	2000	2001	2002	2003	2004	2005	2006	2007	2008	2009	2010	2011	2012	2013	2014	2015	2016	2017	Correlation
IL1A	3552	17	102	80	2	11	42.4	98	114	93	106	129	120	101	74	81	74	59	65	75	62	58	53	58	63	45	37	34	16	15	18	22	19	17	22	-0.910735
CD40LG	959	3	72	113.5	23	4	43.1	0	0	2	19	32	55	75	72	77	92	137	139	152	129	132	123	132	128	120	107	96	99	98	77	84	99	75	61	-0.938688
STAT3	6774	50	4	143	18	2	43.4	0	0	0	1	9	24	43	36	45	73	85	84	119	124	157	180	202	242	276	313	334	439	500	643	678	783	884	981	0.955206
IL15	3600	72	129	38	13.5	36.5	57.8	0	0	0	0	2	20	49	50	66	61	73	80	75	80	75	86	92	88	99	97	99	108	106	88	97	109	115	103	0.868726
FAS	355	35	18	52	177.5	20	60.5	0	1	8	7	17	59	98	140	183	163	154	120	102	96	79	64	59	57	40	45	56	50	41	29	26	30	29	41	-0.87993
APP	351	25	16	263	5	19	65.6	32	65	105	134	136	128	167	185	197	221	270	276	324	345	394	384	441	479	475	526	527	392	522	446	455	615	665	782	0.867525
TLR2	7097	6	75	84	146	22	66.6	0	0	0	0	0	0	0	0	2	9	14	28	34	56	84	60	65	81	87	98	115	104	105	123	117	110	88	109	0.868348
C3	718	49	67	84	49.5	88.5	67.6	108	94	135	152	137	144	138	121	157	147	151	164	115	132	155	140	134	155	168	141	143	150	194	176	213	169	163	159	0.551125
IL13	3596	5	110	33.5	177.5	14.5	68.1	0	0	0	14	22	45	67	79	80	79	82	110	103	121	107	94	90	109	112	89	97	109	108	144	92	129	121	116	0.435239
CXCL10	3627	7	92	86	55	101.5	68.3	1	2	2	6	5	6	6	7	16	15	16	21	31	32	35	42	52	46	54	51	61	74	83	89	104	98	112	103	0.979292
CXCL12	6387	21	33	267	6	24	70.2	0	0	0	0	0	1	8	13	28	34	54	62	70	85	73	114	126	144	176	169	195	210	240	239	284	277	235	257	0.969748
AGT	183	22	5	130	74.5	120	70.3	46	29	40	37	38	55	45	61	72	73	63	55	56	47	49	43	47	50	48	33	46	46	62	58	55	67	44	36	-0.129228
FGF2	2247	69	38	245	13.5	5.5	74.2	21	36	47	60	67	95	124	134	131	123	154	157	157	157	176	172	166	130	189	168	179	166	164	175	169	167	182	179	0.464121
ESR2	2100	19	20	106	98.5	134	75.5	18	10	19	16	25	22	30	29	47	53	71	86	77	74	94	107	103	98	112	95	87	56	58	42	62	47	54	59	-0.581548
F2	2147	15	6	293	49.5	21	76.9	0	10	0	1	2	2	1	0	1	1	2	2	4	0	0	1	2	1	2	4	5	2	2	3	3	2	3	1	0.217996
PLG	5340	18	9	254	36.5	82	79.9	530	538	531	455	467	492	465	492	475	424	430	480	410	441	417	435	373	375	389	337	359	392	368	384	400	382	347	351	-0.72718
PLAU	5328	67	8	282.5	17	39	82.7	13	20	29	26	26	44	44	54	60	49	60	60	68	59	74	72	72	91	110	102	115	131	141	165	164	156	180	210	0.96557
THBD	7056	40	128	72.5	69	120	85.9	34	40	50	56	68	61	60	74	72	60	49	44	41	48	47	37	28	34	38	38	36	54	58	65	70	75	69	76	0.715097
AREG	374	82	255	46.5	23	57.5	92.8	1	4	8	6	10	15	11	13	6	11	1	6	6	9	9	21	13	13	19	19	26	24	29	18	19	32	34	31	0.902078
KDR	3791	71	24	148.5	98.5	150.5	98.5	0	2	2	6	12	12	27	20	28	59	61	69	71	88	132	138	147	160	166	158	198	225	244	257	237	283	285	266	0.980615
IL2RA	3559	10	60	321.5	36.5	75.5	100.7	21	32	27	34	39	47	44	35	36	34	47	63	103	131	178	275	291	331	316	291	232	209	216	197	160	151	138	101	0.128224
ELANE	1991	42	236	223.5	7	24	106.5	52	62	31	42	58	63	56	55	49	41	50	50	57	59	48	67	71	85	76	75	99	84	99	86	86	89	73	90	0.80385
EPO	2056	240	83	50	165.5	5.5	108.8	30	42	31	29	38	34	36	38	52	32	47	39	72	72	88	103	100	122	111	75	78	62	70	70	58	43	54	51	-0.228447
INSR	3643	38	2	318	109	93	112	13	20	14	10	4	7	8	4	7	4	3	4	5	4	5	4	5	7	3	7	5	10	7	9	10	13	11	18	0.84467
KITLG	4254	90	149	223.5	31	75.5	113.8	16	43	71	107	109	107	119	92	98	97	108	77	87	97	82	93	93	70	94	78	84	85	102	122	95	100	81	103	0.23028
IL3	3562	156	155	30	87	150.5	115.7	167	194	158	173	153	161	135	112	98	96	68	69	50	47	46	33	28	21	28	25	27	26	27	15	31	23	27	21	-0.801718
PPBP	5473	24	63	54.5	204	243	117.7	14	13	7	9	18	13	14	16	16	19	17	25	26	19	38	24	40	19	31	22	31	24	39	32	35	45	36	48	0.665723
IL17A	3605	239	311	18.5	13.5	12	118.8	0	0	0	0	0	2	2	1	3	9	13	16	18	20	19	28	55	69	141	202	251	304	362	385	423	428	491	459	0.965374
HIF1A	3091	326	30	230	1	8	119	0	0	0	0	0	0	4	9	16	17	32	59	92	113	165	189	238	256	309	309	264	69	63	65	78	49	56	74	-0.163497
PPARA	5465	54	28	436.5	23	57.5	119.8	0	0	0	4	10	12	23	33	52	62	102	140	167	193	219	239	271	333	330	280	250	158	194	249	198	171	186	209	0.151581
LTA	4049	45	194	4	118	243	120.8	8	8	19	13	8	11	19	25	23	19	23	25	22	23	24	22	35	30	28	24	29	10	25	24	18	17	21	19	-0.359134
NR3C2	4306	65	91	333.5	40.5	75.5	121.1	19	26	13	19	28	21	20	19	40	16	32	22	33	33	46	42	38	55	56	52	71	90	93	109	105	127	232	239	0.858458
SELP	6403	2	79	106	411	40.5	127.7	8	21	24	44	59	84	96	108	141	108	115	122	111	108	116	93	91	92	82	93	86	74	63	58	65	76	52	62	-0.93785
MMP3	4314	12	201	372.5	19	36.5	128.2	5	5	14	9	28	19	32	34	32	42	40	36	45	51	57	57	51	55	55	60	63	60	52	58	70	73	59	58	0.765038
NOS1	4842	11	77	333.5	98.5	128.5	129.7	4	3	7	17	31	50	63	60	94	123	111	109	119	127	156	129	124	119	137	150	136	124	160	130	138	143	126	140	0.474514
IRF1	3659	86	22	223.5	165.5	159.5	131.3	15	10	16	15	36	42	32	48	40	45	46	29	41	40	40	41	56	50	33	52	54	43	64	62	61	80	66	79	0.825533
APOB	338	95	13	393.5	55	101.5	131.6	128	134	154	137	140	147	157	147	155	147	122	107	107	103	109	93	104	123	117	92	107	100	112	100	89	114	86	82	-0.509625
C5	727	99	197	254	40.5	82	134.5	22	27	31	18	28	32	30	31	26	33	31	31	33	34	40	31	26	26	45	32	30	41	37	49	44	28	50	38	0.473664
PTGS1	5742	74	135	30	192	259	138	1	3	2	8	12	17	21	33	47	38	50	46	58	61	54	50	73	61	38	57	73	44	46	53	62	49	36	47	-0.231526
MAPK1	5594	179	12	463	36.5	1	138.3	12	7	15	19	20	42	82	125	160	255	370	415	430	463	505	546	531	529	564	523	589	607	645	694	723	749	771	757	0.977412
TGFB2	7042	8	1	386	126.5	177	139.7	16	8	20	17	18	24	31	29	29	36	32	30	27	19	31	27	25	25	32	23	20	10	6	5	6	1	5	11	-0.856456
TLR9	54106	52	299	116	109	150.5	145.3	0	0	0	0	0	0	0	0	0	0	0	2	8	19	40	65	72	87	89	96	124	131	139	146	159	151	130	124	0.940021
CD36	948	28	61	267	165.5	215	147.3	10	19	22	25	26	21	34	32	32	38	42	50	62	45	55	59	53	66	71	68	73	91	89	102	76	69	104	98	0.866412
IL2RB	3560	66	46	157	204	269.5	148.5	20	19	32	26	48	33	60	60	79	80	63	61	71	71	72	81	77	72	84	70	69	57	68	80	71	71	71	50	-0.140676
OSM	5008	259	290	22	60.5	116	149.5	5	5	15	15	20	21	22	31	30	26	40	26	35	31	19	26	34	22	28	31	20	33	20	21	35	41	26	37	0.0303417
CCL22	6367	26	379	10	146	190	150.2	0	0	1	1	2	3	2	4	16	16	14	23	19	25	35	38	42	36	60	62	51	87	101	89	77	101	72	92	0.91767
C5AR1	728	242	354	57.5	29	70.5	150.6	22	27	31	18	29	31	29	32	26	32	32	28	35	34	39	32	26	27	43	33	30	39	39	51	49	32	48	50	0.643149
TNFRSF1B	7133	89	88	144	192	243	151.2	20	19	32	27	50	36	63	61	84	88	73	73	89	81	83	100	83	82	94	83	79	72	74	99	94	85	101	78	0.278475
CD86	942	190	350	28	69	124	152.2	18	13	14	22	22	45	63	63	67	69	47	49	45	49	53	41	30	31	24	21	14	21	27	28	26	20	22	15	-0.847392
NR4A1	3164	13	36	346	192	190	155.4	9	15	6	24	17	23	22	25	47	47	48	41	39	41	42	40	39	47	48	44	39	42	61	42	68	74	55	65	0.685512
SMAD3	4088	195	68	349	74.5	96.5	156.6	0	0	0	2	0	1	1	4	17	17	17	35	28	46	57	52	56	48	52	51	62	62	71	96	93	107	126	142	0.919554
CFLAR	8837	75	183	177.5	135.5	215	157.2	73	94	65	65	82	68	63	76	83	82	124	138	156	160	197	214	242	257	294	350	297	329	338	370	417	462	465	544	0.980517
MAPK8	5599	141	100	190.5	341	24	159.3	0	0	0	0	0	0	2	4	3	4	5	6	9	6	6	6	13	11	9	17	12	9	13	18	21	5	21	10	0.592675
CCL7	6354	20	208	69	230.5	269.5	159.4	4	5	7	6	8	13	8	12	10	16	18	10	11	10	15	10	16	23	27	25	21	34	34	26	57	48	47	30	0.82752
TNC	3371	333	127	131	74.5	134	159.9	40	59	48	76	79	86	84	90	70	81	60	58	60	47	69	43	57	46	49	43	45	60	37	56	49	57	56	53	-0.217448
MYD88	4615	253	14	33.5	230.5	269.5	160.1	1	0	0	0	1	1	1	4	4	1	6	9	19	28	29	50	58	81	82	92	101	126	118	159	183	169	155	200	0.982356
CCND1	595	164	55	270	288.5	26.5	160.8	8	18	18	15	20	24	17	19	17	14	8	7	14	16	15	11	17	16	23	13	14	26	22	26	25	31	44	20	0.785143
IRS1	3667	68	15	325	192	207	161.4	1	2	10	33	45	51	55	44	47	38	38	49	53	53	56	59	55	51	47	47	45	52	54	64	61	35	66	53	0.252528
FLNA	2316	46	113	551	44	62.5	163.3	4	7	5	6	16	12	5	11	5	14	17	97	54	37	33	38	49	38	38	42	54	67	63	56	68	63	53	69	0.367065
CTLA4	1493	116	142	171	192	215	167.2	1	4	8	9	24	34	57	60	67	90	105	90	105	103	97	119	128	113	109	126	110	102	121	159	150	154	118	176	0.751178
NGF	4803	87	161	210.5	341	36.5	167.2	62	88	83	88	117	87	97	103	89	88	100	55	61	74	74	64	63	75	69	79	75	86	81	82	86	99	76	89	0.480403
NFE2L2	4780	308	190	190.5	126.5	40.5	171.1	0	0	0	0	0	0	0	0	0	0	0	0	1	0	1	2	1	2	7	5	12	15	15	12	26	30	39	40	0.901702
SERPINB2	5055	176	178	190.5	135.5	177	171.4	36	43	31	40	57	53	53	65	62	63	70	77	70	84	75	77	78	88	86	75	86	72	84	87	78	84	82	65	0.176236
AHSG	197	197	221	167.5	109	167.5	172.4	12	13	10	8	5	4	8	4	9	5	4	5	10	9	4	19	14	26	36	32	51	34	49	67	71	69	50	56	0.923236
CASP1	834	183	120	241	146	177	173.4	2	1	3	7	19	28	49	63	53	53	42	41	31	41	36	52	46	53	37	37	49	62	64	68	58	74	77	71	0.847126
STAT6	6778	43	56	321.5	215.5	243	175.8	0	0	0	0	0	1	13	16	22	26	43	30	37	42	46	26	34	29	28	41	31	50	41	50	36	49	58	50	0.516801
PF4	5196	88	344	77	155.5	215	175.9	26	23	20	12	19	29	21	22	12	21	13	14	27	25	29	25	18	34	26	27	29	20	36	27	30	29	25	34	0.569016
IGFBP3	3486	307	69	363	44	96.5	175.9	10	15	25	45	48	73	65	69	74	80	93	72	101	70	88	97	88	93	60	81	70	71	82	65	70	77	55	39	-0.666317
ANXA1	301	30	117	414	155.5	167.5	176.8	36	22	29	43	41	42	53	48	48	45	56	56	46	48	36	35	29	34	44	36	55	34	61	52	63	64	60	56	0.411417
IFNB1	3456	44	294	527	3.5	17.5	177.2	41	39	45	46	63	78	79	98	99	139	128	122	146	133	161	166	145	171	168	171	139	55	87	86	101	98	77	62	-0.645679
COL1A1	1277	61	10	359	230.5	226.5	177.4	4	9	4	9	7	6	10	7	11	9	15	11	15	7	14	12	12	12	12	13	5	9	18	15	11	15	22	17	0.360091
AGTR1	185	55	104	552	74.5	106.5	178.4	2	7	34	44	92	81	87	133	140	130	119	124	135	160	156	151	158	155	149	141	127	132	123	163	144	145	118	104	-0.239943
CD44	960	57	19	99.5	668	49.5	178.6	23	28	25	24	32	15	17	20	15	24	15	17	12	16	19	16	8	15	19	16	12	15	15	16	10	16	12	13	-0.255038
MMP8	4317	27	276	282.5	135.5	177	179.6	6	5	5	7	9	7	5	8	9	12	11	19	20	14	15	15	22	22	27	22	35	34	28	39	31	37	41	39	0.916424
TXN	7295	319	154	46.5	311.5	75.5	181.3	35	36	37	28	29	25	36	33	50	41	45	40	54	60	55	56	53	55	317	316	447	465	469	201	189	200	142	136	0.491817
NAMPT	10135	431	340	17	36.5	82	181.3	0	0	1	0	0	0	0	0	0	0	0	0	1	1	1	10	36	54	67	76	100	93	97	115	116	122	115	108	0.956835
PGF	5228	449	105	7	146	200	181.4	35	33	32	37	34	33	34	36	42	32	41	55	47	55	47	47	52	45	51	50	75	96	105	101	78	95	120	106	0.863731
MMP10	4319	29	225	190.5	204	259	181.5	2	1	5	7	3	1	5	3	3	0	4	4	4	2	6	3	5	4	5	11	5	11	16	12	11	10	13	10	0.794333
ITGAM	3684	101	112	543	49.5	106.5	182.4	14	17	21	38	33	32	48	48	52	41	42	36	35	42	40	39	40	44	44	31	37	36	37	43	46	38	30	30	-0.287658
IL22	50616	160	632	6	33	82	182.6	148	143	147	161	146	139	128	149	139	128	131	117	98	116	111	105	102	122	144	136	182	201	224	255	270	225	251	255	0.900707
SERPINA3	12	171	54	72.5	311.5	334.5	188.7	23	18	16	27	15	29	24	25	29	23	20	22	17	12	10	11	7	7	10	4	8	2	3	1	2	5	1	9	-0.816179
PDGFRB	5159	36	3	233	341	334.5	189.5	1	2	4	3	8	4	0	5	6	6	9	6	12	18	22	23	22	34	42	27	35	32	37	41	48	37	39	52	0.912438
NPPA	4878	138	319	84	165.5	243	189.9	97	130	122	97	86	85	68	76	57	40	53	62	57	60	62	56	41	42	54	41	62	53	44	51	51	53	45	48	-0.43296
IL11	3589	172	428	36	126.5	190	190.5	1	6	14	22	24	37	56	33	38	37	37	42	36	28	30	33	30	19	13	13	20	20	28	22	26	31	25	22	-0.519033
FLT1	2321	132	7	177.5	311.5	350	195.6	1	3	4	14	21	40	65	60	68	73	81	92	115	127	146	152	150	191	177	157	203	219	231	252	252	235	262	254	0.969707
ANGPT2	285	533	134	56	98.5	159.5	196.2	0	0	0	0	0	0	0	2	6	6	15	15	12	14	28	27	36	41	39	48	44	48	59	77	70	48	85	60	0.914356
CD46	4179	76	205	91	230.5	387.5	198	16	28	32	38	54	55	73	75	73	91	91	80	110	94	89	106	123	115	124	142	153	126	162	124	135	155	128	108	0.676714
CAV1	857	33	43	502	388.5	28	198.9	4	2	3	1	5	0	11	6	19	34	42	91	109	118	166	160	205	187	217	221	241	243	285	274	282	296	282	287	0.960886
CP	1356	140	126	333.5	177.5	226.5	200.7	42	32	37	29	31	45	34	35	31	42	36	30	40	25	37	39	44	30	48	35	46	30	47	41	51	31	33	40	0.254303
IL23A	51561	98	512	141.5	98.5	159.5	201.9	5	13	16	11	15	19	26	31	19	21	25	16	22	30	44	43	61	66	104	103	114	107	125	144	110	128	135	132	0.949878
TIMP3	7078	147	29	458.5	165.5	215	203	0	0	1	1	9	9	14	11	21	10	15	11	9	26	19	22	16	23	20	25	18	21	30	38	29	22	41	31	0.75837
CDH1	999	39	32	568.5	366.5	10	203.2	14	28	27	45	72	98	84	78	104	127	129	157	183	154	161	177	186	229	238	193	237	220	273	283	292	282	316	243	0.90617
CSF2	1437	343	53	171	443	7	203.4	483	514	551	593	640	641	630	557	564	547	472	418	408	345	353	322	357	307	321	307	283	307	316	288	321	307	297	304	-0.787449
TNFRSF11B	4982	396	186	63	311.5	67	204.7	0	2	0	1	1	1	1	0	17	8	4	17	20	12	38	34	39	34	31	41	47	52	49	60	57	75	53	64	0.927047
COMT	1312	260	282	294	77.5	116	205.9	22	20	25	27	23	24	25	41	38	38	49	48	50	71	78	79	107	110	106	111	152	132	164	152	158	143	123	119	0.857865
PROC	5624	78	47	210.5	567	128.5	206.2	4	3	6	6	4	7	9	8	7	7	8	14	11	6	6	10	7	7	4	7	6	8	12	11	8	7	5	3	-0.358224
S100A8	6279	246	449	165	60.5	111	206.3	16	18	16	31	37	39	46	47	79	92	89	79	85	96	73	76	86	85	83	108	104	119	148	146	141	144	161	107	0.803833
ANPEP	290	104	413	123	165.5	226.5	206.4	19	19	30	33	37	46	32	46	43	35	40	47	36	35	28	39	43	56	43	42	44	39	54	61	48	45	37	59	0.489192
NR1I3	9970	133	48	353.5	311.5	190	207.2	1	2	1	2	2	0	2	1	1	1	5	7	13	21	10	20	12	27	17	20	20	26	17	26	24	23	36	25	0.781618
EDNRB	1910	196	17	123	341	365	208.4	1	4	24	39	50	74	66	56	70	63	72	46	62	43	57	44	52	41	38	34	26	30	35	27	32	38	37	29	-0.782722
TIMP2	7077	180	84	232	230.5	317	208.7	2	11	13	15	21	15	22	21	21	25	21	24	17	25	29	23	25	32	29	17	24	45	35	30	39	43	31	47	0.729982
ADCYAP1	116	194	280	179	165.5	226.5	209	12	23	39	51	74	89	144	104	157	90	137	95	118	82	80	55	122	81	94	58	88	76	91	86	87	83	83	66	-0.456644
AMH	268	417	257	18.5	146	207	209.1	16	24	17	30	34	26	21	17	36	39	40	28	44	51	43	70	65	58	79	102	99	127	136	169	173	185	199	202	0.968532
SP1	6667	434	40	231	311.5	33.5	210	5	6	10	11	11	10	4	18	11	8	12	14	8	15	11	11	10	11	11	11	10	14	16	18	10	6	17	11	0.109975
CCL17	6361	93	498	39.5	192	243	213.1	0	0	0	0	0	0	0	2	3	3	1	13	9	17	20	13	9	12	13	10	13	17	9	17	16	14	16	16	0.425879
F3	2152	230	335	483.5	3.5	14.5	213.3	66	74	92	123	150	156	162	175	173	164	204	179	188	215	180	184	164	208	185	177	187	204	200	156	168	153	186	165	-0.462217
CALCA	796	366	480	101.5	31	88.5	213.4	315	365	448	331	324	303	243	255	251	248	221	251	215	215	234	218	205	194	182	169	189	198	191	187	175	176	185	211	-0.696774
MYB	4602	122	269	97.5	273	317	215.7	41	50	84	45	73	70	90	80	58	76	66	58	57	63	63	64	47	84	86	80	95	97	129	145	151	153	157	162	0.927428
CD14	929	126	44	214.5	614.5	82	216.2	11	15	29	51	45	60	61	65	76	75	96	99	100	112	82	118	101	99	86	83	89	94	101	126	114	131	119	108	0.435391
TTR	7276	312	156	393.5	87	134	216.5	47	46	70	49	44	55	56	35	61	66	78	55	68	63	56	77	70	88	99	102	105	135	164	153	138	177	209	266	0.904148
FOXP3	50943	244	147	545	49.5	101.5	217.4	2	2	1	1	0	0	0	0	2	1	5	12	3	14	27	66	128	235	286	342	314	370	375	377	296	319	292	288	0.859334
CYP1A1	1543	79	554	243	80	134	218	20	33	36	51	47	57	66	60	75	65	69	64	51	61	70	74	66	65	62	56	68	55	73	69	74	60	56	67	0.0305099
ABL1	25	258	132	473	69	159.5	218.3	67	63	58	96	100	120	132	125	139	126	190	156	200	193	193	206	220	235	261	241	260	276	273	285	277	272	225	278	0.846507
MIF	4282	391	355	135.5	87	134	220.5	14	12	6	19	30	14	40	34	46	51	61	49	68	74	69	98	94	86	93	106	106	103	123	132	117	135	137	114	0.92876
HSPD1	3329	217	136	534	109	106.5	220.5	23	26	53	63	81	76	83	85	85	92	95	71	84	92	91	98	92	77	85	76	76	72	94	89	69	69	86	74	-0.414324
GZMB	3002	184	274	372.5	118	159.5	221.6	13	12	11	28	65	75	105	88	82	88	87	88	81	100	100	98	95	94	82	87	87	92	97	129	128	98	102	118	0.583949
F2R	2149	341	152	272	146	200	222.2	8	15	34	36	54	57	57	51	34	47	55	61	50	58	61	53	51	75	77	82	89	89	109	98	96	88	100	84	0.853376
SOCS3	9021	365	21	496.5	87	142	222.3	3	7	2	6	4	3	3	3	8	17	15	24	21	33	34	49	60	58	72	51	59	67	82	75	69	85	78	79	0.923169
LDLR	3949	124	89	464	192	243	222.4	73	75	92	89	115	144	137	146	178	142	140	158	136	127	154	133	181	164	162	142	145	172	200	171	177	187	185	155	0.627789
RARRES2	5919	232	555	32	118	177	222.8	0	0	0	0	0	0	0	0	0	0	0	0	0	2	2	5	1	7	6	17	26	25	48	31	68	63	57	43	0.893664
ABCB1	5243	152	408	483.5	23	49.5	223.2	12	19	26	31	27	41	49	45	54	40	49	60	73	78	101	111	128	135	141	126	134	152	144	194	189	228	188	162	0.926415
CMA1	1215	306	411	63	146	190	223.2	11	8	9	12	8	9	18	40	27	38	35	40	46	49	49	29	26	22	26	29	26	26	28	38	30	31	35	35	-0.38148
SIRT1	23411	392	222	292	165.5	44.5	223.2	0	1	0	1	1	0	2	2	2	7	8	8	13	21	27	39	52	66	120	139	166	237	281	363	399	449	495	537	0.954874
TGFB3	7043	14	51	148.5	443	459.5	223.2	5	11	6	5	13	12	15	21	10	20	16	18	23	21	13	18	20	12	34	25	27	7	15	12	12	16	2	2	-0.486214
CTSB	1508	77	81	816.5	60.5	93	225.6	36	38	36	36	48	48	35	48	42	29	46	46	47	42	45	40	50	26	48	37	66	78	105	118	160	188	235	219	0.842269
MMP12	4321	70	320	282.5	215.5	243	226.2	3	6	3	2	3	5	6	6	7	11	9	12	9	11	18	20	23	20	22	28	21	21	27	21	33	33	30	20	0.804617
HMGB1	3146	384	228	476	16	29.5	226.7	9	3	5	4	11	9	5	14	17	23	16	18	13	26	30	27	44	90	113	95	117	156	187	230	247	289	287	282	0.965601
GATA3	2625	109	171	531	135.5	190	227.3	3	8	3	7	11	7	4	12	18	16	21	15	16	16	31	34	36	24	34	65	55	48	63	94	77	71	84	93	0.929664
TLR7	51284	294	306	123	177.5	243	228.7	0	0	0	0	0	0	0	0	0	0	0	0	3	8	5	15	20	29	39	43	44	62	72	62	65	85	75	60	0.954956
ANXA5	308	130	123	91	388.5	414	229.3	17	10	22	20	36	24	24	39	30	54	45	36	26	40	57	32	68	42	40	48	35	40	38	42	43	39	35	37	-0.114768
FGFR1	2260	48	64	465	273	297.5	229.5	3	6	19	10	25	21	31	22	33	25	23	20	29	36	27	32	41	42	36	46	42	48	92	93	90	117	115	117	0.917207
TSLP	85480	120	669	91	109	159.5	229.7	0	0	0	0	0	0	1	0	0	1	2	3	4	2	6	12	7	22	28	37	53	53	64	68	77	61	87	73	0.959755
NOD2	64127	161	244	326	204	215	230	0	1	0	1	1	0	4	1	4	4	3	8	27	59	64	68	58	79	58	56	81	70	71	72	65	65	56	61	0.608272
LPL	4023	94	39	383	479	177	234.4	4	3	9	5	9	3	12	7	8	4	12	12	17	21	9	19	10	22	21	22	23	24	19	30	26	32	17	25	0.690185
CYBB	1536	115	207	446	135.5	269.5	234.6	2	3	4	8	6	8	13	11	16	14	20	26	18	18	16	28	21	18	17	35	28	36	44	50	59	49	55	62	0.880241
CLU	1191	157	108	434	215.5	259	234.7	10	20	30	32	32	27	34	24	29	32	36	36	32	25	43	54	56	49	50	71	60	92	115	90	103	88	112	107	0.922381
IL12A	3592	51	114	174	411	436	237.2	4	4	6	13	19	25	23	21	22	25	32	41	34	38	23	25	18	22	21	15	31	14	30	16	29	33	20	16	-0.480402
GJA1	2697	181	101	380	230.5	297.5	238	0	3	1	4	5	7	10	9	12	10	16	29	14	18	16	28	16	28	28	41	29	30	58	57	63	71	51	51	0.851235
PPARGC1A	10891	149	85	348	311.5	297.5	238.2	0	0	0	0	0	0	0	0	0	0	0	0	1	13	18	30	41	43	52	56	53	14	12	16	13	13	9	20	0.113955
EGF	1950	4	31	202	952.5	3	238.5	4	4	4	13	18	10	5	3	2	2	3	3	4	2	3	0	4	4	6	1	4	2	4	8	5	6	5	3	0.425413
MMRN1	22915	367	378	190.5	109	159.5	240.8	3	1	5	2	11	12	9	10	11	7	26	12	18	25	17	30	23	24	30	41	31	52	53	77	97	88	108	96	0.904243
TLR1	7096	37	302	207	311.5	350	241.5	10	5	8	8	7	11	6	6	6	5	4	4	6	5	5	9	9	8	12	4	11	8	22	19	14	16	37	13	0.724966
HSPG2	3339	221	94	175.5	366.5	365	244.4	10	20	17	28	21	33	35	33	32	47	41	40	43	41	56	47	51	53	37	55	53	38	61	59	65	55	54	56	0.627411
SERPINF2	5345	173	45	69	411	531	245.8	28	31	25	32	26	30	30	28	30	47	29	38	21	35	43	34	45	36	47	43	40	39	43	57	68	72	59	63	0.840045
CDK2	1017	331	23	387	288.5	200	245.9	0	1	6	18	15	42	43	50	44	32	33	38	16	37	31	40	33	39	33	38	38	37	38	39	31	35	42	23	0.130156
IL17F	112744	189	616	237	69	120	246.2	6	7	4	8	3	2	7	5	7	7	5	8	7	3	6	9	8	7	11	10	13	14	20	19	23	43	22	25	0.825847
CXCR2	3579	193	314	141.5	251	334.5	246.8	0	0	0	0	0	0	0	3	8	11	8	11	16	14	21	16	23	24	24	26	25	31	23	27	30	38	28	38	0.914499
SPHK1	8877	418	292	123	177.5	226.5	247.4	0	1	1	6	4	0	5	2	0	2	7	8	16	10	17	26	22	28	34	29	42	43	61	52	54	60	71	88	0.96375
SST	6750	316	536	13.5	311.5	67	248.8	43	38	31	21	18	21	19	29	36	37	26	37	21	31	34	25	28	21	36	34	39	49	59	50	74	72	77	75	0.873997
APCS	325	564	343	175.5	60.5	101.5	248.9	22	23	36	18	47	40	43	57	58	51	86	76	97	87	92	93	105	97	100	102	107	125	147	117	125	112	128	129	0.852831
APOH	350	56	66	522	288.5	317	249.9	5	12	31	34	30	52	45	44	77	71	53	35	44	46	53	42	34	38	28	25	27	15	10	9	12	14	20	7	-0.902609
PLA2G2A	5320	243	146	190.5	311.5	365	251.2	0	3	1	6	2	6	17	22	16	25	13	17	16	16	13	21	14	18	17	26	15	12	19	24	16	11	17	17	0.110071
PRKD1	5587	408	151	115	273	317	252.8	8	1	9	2	8	18	27	26	22	51	33	30	33	31	34	42	44	58	64	72	70	88	78	60	85	72	74	72	0.871317
CXCL2	2920	63	130	63	479	531	253.2	1	1	1	1	0	0	0	0	0	2	1	2	2	2	6	1	7	10	2	5	9	4	6	9	6	10	11	10	0.757815
KIT	3815	53	220	344	479	177	254.6	0	3	0	5	4	5	6	3	11	7	13	9	19	34	34	35	28	21	26	25	18	26	29	18	28	37	24	26	0.293961
SERPINA4	5267	437	109	91	311.5	334.5	256.6	1	1	4	7	6	11	6	11	7	11	12	15	10	10	14	12	18	20	16	13	22	25	24	37	53	51	46	49	0.879195
ABCA1	19	58	150	439.5	311.5	334.5	258.7	0	1	0	0	0	0	2	5	3	10	23	38	52	43	51	56	56	52	56	53	69	61	89	69	71	83	75	61	0.823654
PARP1	142	444	157	579	44	70.5	258.9	4	4	5	1	3	4	7	7	8	24	19	28	23	46	46	50	68	59	78	101	136	158	185	193	221	244	279	347	0.955999
VDR	7421	16	62	400	411	414	260.6	1	1	0	0	2	1	1	0	11	10	5	7	14	11	24	10	21	34	18	30	39	34	37	60	52	67	64	77	0.943038
CCR5	1234	80	141	171	614.5	297.5	260.8	0	0	0	0	0	0	11	71	109	119	123	132	117	147	130	156	139	161	140	132	135	151	124	128	136	118	92	89	-0.450552
TNFSF13B	10673	102	704	27	192	280	261	4	6	4	5	3	4	6	4	4	14	254	320	33	42	47	66	89	80	98	82	91	118	105	106	110	130	146	133	-0.131075
CAD	790	430	495	343	9.5	31.5	261.8	19	28	27	18	32	25	33	30	28	39	37	41	36	60	62	93	88	105	85	96	112	106	143	140	167	167	219	281	0.924036
EPCAM	4072	252	689	171	80	134	265.2	7	4	4	6	16	17	13	10	18	27	14	24	14	28	31	20	20	40	45	68	57	72	80	102	112	114	81	96	0.925199
IL6R	3570	117	49	190.5	479	493.5	265.8	8	11	14	19	27	26	27	25	22	28	21	17	22	21	15	19	28	17	15	15	31	35	31	40	49	40	26	27	0.642414
CTSL	1514	213	93	489.5	288.5	259	268.6	15	15	20	13	18	26	16	24	24	26	29	40	38	29	40	33	44	34	47	50	57	54	48	68	60	77	72	50	0.834239
CD38	952	346	609	30	135.5	226.5	269.4	5	3	9	20	26	37	36	46	49	52	50	42	49	51	44	38	55	42	54	36	44	64	65	58	48	70	74	68	0.662155
IL33	90865	262	432	346	118	190	269.6	0	0	0	0	0	0	0	0	0	0	0	0	0	1	0	1	0	11	20	32	58	63	103	146	139	196	206	220	0.917591
PSAP	5660	91	90	548	288.5	334.5	270.4	13	14	18	12	29	22	38	46	43	35	48	53	58	57	67	59	70	70	71	65	78	73	96	75	96	74	79	89	0.847506
MTOR	2475	289	227	273	521.5	42.5	270.6	1	1	0	5	2	4	6	4	7	3	8	11	7	9	17	11	10	11	17	13	30	20	22	35	37	33	46	47	0.901845
CCL13	6357	23	237	42.5	521.5	531	271	0	0	0	0	0	0	2	5	1	5	4	3	0	2	2	0	4	4	5	1	5	1	2	4	2	2	2	5	0.147366
RBP4	5950	108	148	539	273	297.5	273.1	12	7	11	13	15	13	15	15	17	21	18	23	18	13	21	12	29	61	63	84	71	66	80	79	73	69	63	62	0.811189
CFTR	1080	112	301	816.5	49.5	88.5	273.5	4	29	63	74	88	93	95	96	91	105	112	126	114	98	122	116	114	113	140	126	161	170	185	195	187	181	181	188	0.896828
MBP	4155	424	267	506	60.5	111	273.7	95	93	75	99	97	106	84	104	83	76	78	49	53	52	38	39	47	37	51	46	48	37	50	33	46	48	31	36	-0.570986
CD55	1604	9	248	816.5	118	177	273.7	9	7	10	16	17	22	33	14	28	25	32	40	32	29	30	30	56	32	31	29	44	39	45	54	45	41	44	60	0.614902
ANGPT1	284	162	439	237	251	280	273.8	0	0	0	1	0	0	3	2	7	12	14	23	29	37	39	40	35	43	55	53	56	50	47	50	55	44	57	49	0.804202
F2RL1	2150	476	173	359	155.5	207	274.1	0	0	1	0	2	4	13	14	10	16	16	25	30	31	26	32	38	26	36	35	36	40	32	42	40	35	43	27	0.633504
CCL5	6352	1	1041	216.5	44	70.5	274.6	2	1	5	12	20	28	55	59	62	77	90	81	73	79	57	77	100	63	71	62	62	80	69	68	88	62	64	73	-0.314515
DDR1	780	105	277	307	341	350	276	11	5	6	10	15	17	17	14	12	8	19	21	24	15	19	17	22	11	27	21	35	31	29	30	43	38	48	43	0.832623
MAF	4094	170	195	333.5	341	350	277.9	1	8	10	4	8	7	5	10	10	9	11	14	17	23	22	16	16	25	11	19	20	28	21	16	23	35	19	33	0.591377
PIK3CD	5293	386	73	267	614.5	49.5	278	0	0	0	0	0	0	0	0	0	1	0	3	4	0	5	3	7	13	8	5	9	1	4	5	5	3	5	8	0.286419
SOCS2	8835	202	184	282.5	341	387.5	279.4	5	5	1	4	0	2	1	5	4	11	10	7	13	11	9	21	20	11	17	27	19	29	35	32	26	25	25	26	0.806856
AKR1B1	231	248	643	413	27.5	67	279.7	78	116	91	89	70	78	63	88	74	77	64	62	61	72	72	62	73	49	78	66	75	85	85	97	85	79	94	96	0.787669
ARG1	383	324	95	372.5	273	334.5	279.8	6	1	6	2	7	1	4	2	2	5	4	5	10	7	6	10	11	12	18	17	18	26	29	37	24	41	26	28	0.896923
BCAM	4059	436	321	307	135.5	200	279.9	0	0	0	0	3	1	1	0	1	2	2	3	1	1	1	2	0	5	3	3	4	2	3	6	7	2	2	3	0.428382
HDAC2	3066	416	99	333.5	311.5	243	280.6	0	1	0	1	0	1	2	3	5	6	7	8	8	7	8	8	9	12	19	30	23	28	28	33	51	47	48	56	0.940254
PRKAA2	5563	205	233	321.5	311.5	334.5	281.1	0	0	0	0	1	0	0	2	0	4	5	1	6	23	25	31	66	63	121	125	194	250	271	353	410	494	573	627	0.944555
ATM	472	233	215	506	311.5	142	281.5	15	18	30	40	60	71	73	86	104	99	75	92	99	135	120	112	128	134	372	441	430	529	514	255	196	186	114	113	0.342411
IL9	3578	276	842	21	118	167.5	284.9	9	8	13	16	11	20	21	24	25	23	35	32	31	33	30	25	21	19	19	24	26	30	28	40	47	48	47	68	0.590562
LCN2	3934	100	357	816.5	55	96.5	285	1	0	7	5	4	4	4	4	5	10	7	7	10	11	6	21	27	39	63	75	99	125	173	208	213	214	236	187	0.946122
EDN3	1908	167	224	254	366.5	414	285.1	17	48	31	21	22	24	17	14	12	13	18	10	7	12	8	11	11	15	11	6	13	10	7	15	8	9	6	7	-0.398018
RAC1	5879	123	41	506	668	88.5	285.3	3	3	2	2	4	11	13	26	42	26	62	58	68	68	101	78	114	115	122	127	151	167	154	185	189	188	204	161	0.954548
LGALS1	3956	234	611	363	98.5	128.5	287	9	10	8	6	9	18	16	18	25	34	36	26	28	39	30	44	44	36	54	55	56	63	77	58	80	71	90	76	0.928074
RPS6KB1	6198	275	42	96	567	459.5	287.9	0	0	0	0	0	0	0	0	0	1	1	5	8	9	16	6	11	7	12	13	12	15	11	19	15	21	24	8	0.693654
MYDGF	56005	809	259	2.5	155.5	215	288.2	0	0	0	0	0	1	2	0	3	0	0	1	0	4	0	1	4	4	4	6	8	14	7	19	18	26	42	28	0.862803
PROS1	5627	272	118	393.5	614.5	44.5	288.5	26	27	29	29	36	36	42	39	33	36	35	39	50	42	47	40	45	40	66	57	69	81	82	84	101	83	110	112	0.933589
MME	4311	62	399	816.5	49.5	116	288.6	65	73	81	80	76	85	61	49	61	60	71	69	84	66	74	78	81	70	76	67	98	63	75	68	75	102	133	89	0.488639
PRKCD	5580	41	121	553	411	317	288.6	1	9	6	4	13	15	25	16	17	32	32	33	47	36	45	44	53	57	40	52	43	15	9	10	13	8	7	6	-0.713147
LGALS3	3958	134	377	816.5	36.5	82	289.2	11	17	15	15	18	28	18	25	33	38	43	40	44	46	54	49	69	63	89	84	72	99	115	133	171	163	209	191	0.934025
TGFBI	7045	267	189	223.5	388.5	387.5	291.1	2	5	4	5	5	8	8	11	15	26	23	16	24	27	29	25	28	29	39	31	31	31	32	21	26	26	29	22	0.197614
PAM	5066	342	153	205	273	493.5	293.3	27	22	23	29	23	17	35	22	29	31	44	41	48	46	68	59	88	90	94	107	112	122	142	144	139	167	195	211	0.975822
EP300	2033	407	11	473	521.5	57.5	294	36	49	43	36	51	68	65	86	97	135	123	127	103	118	123	123	120	108	119	130	117	147	141	167	171	146	131	153	0.699571
RHOA	387	31	76	489.5	812	62.5	294.2	0	0	0	0	0	0	0	1	0	0	0	0	0	0	0	0	1	0	1	1	1	1	2	0	1	2	2	2	0.80413
HBA1	3039	209	496	282.5	273	226.5	297.4	43	39	43	43	34	38	29	35	45	34	72	39	44	51	44	66	73	58	118	107	117	184	206	220	228	265	274	280	0.943645
CDKN2A	1029	199	316	816.5	87	70.5	297.8	24	37	61	59	113	212	276	290	312	341	363	360	356	367	396	375	382	392	373	310	390	394	415	462	431	477	434	455	0.75192
PON1	5444	329	182	816.5	64.5	111	300.6	2	2	2	6	6	12	9	3	19	18	22	22	39	53	45	65	74	76	97	116	142	155	181	158	168	152	126	120	0.881519
COMP	1311	304	386	425	165.5	226.5	301.4	33	49	49	46	66	52	65	65	65	72	115	84	73	77	99	92	107	123	112	135	157	157	171	169	191	202	231	286	0.916658
PKD1	5310	299	80	576	273	280	301.6	11	14	19	18	24	40	42	37	23	47	46	45	56	41	49	45	60	40	49	47	43	46	54	51	63	62	74	54	0.562755
CYBA	1535	113	261	207	443	493.5	303.5	1	1	2	0	4	2	4	3	4	8	14	8	11	11	15	13	14	17	14	18	18	16	13	26	17	20	23	14	0.663325
PRKAA1	5562	466	234	210.5	311.5	297.5	303.9	0	0	0	0	1	0	0	2	0	4	5	1	6	23	25	31	64	63	121	124	192	249	271	353	407	493	573	623	0.944418
VAV3	10451	475	78	145	411	414	304.6	0	0	0	0	0	0	0	0	0	1	2	0	4	0	1	4	3	0	4	3	8	2	6	7	7	8	7	9	0.802275
POSTN	10631	351	403	321.5	192	259	305.3	0	0	0	1	0	2	0	0	0	2	1	4	5	2	8	10	8	19	25	26	29	40	53	47	68	99	98	124	0.919563
PTH	5741	212	313	307	668	26.5	305.3	19	19	10	13	14	12	10	11	13	8	12	10	7	6	7	5	5	9	9	11	9	10	17	12	12	11	9	12	0.476765
GHR	2690	154	34	565.5	366.5	414	306.8	30	26	38	48	70	61	60	46	53	61	50	51	43	52	46	43	56	66	52	47	33	48	45	37	44	34	46	39	-0.467968
COL4A2	1284	468	74	81	479	436	307.6	1	2	1	0	4	1	14	10	15	14	5	2	8	8	10	13	10	16	13	13	17	21	16	18	26	17	28	29	0.921901
NTS	4922	150	543	123	341	387.5	308.9	85	104	138	86	117	101	78	107	79	70	61	67	64	52	66	62	79	53	64	42	61	59	55	58	81	66	66	57	0.0259895
TBX1	6899	406	426	282.5	192	243	309.9	4	16	10	9	8	15	15	16	19	13	16	18	26	16	14	22	26	28	19	29	38	27	50	49	67	58	41	66	0.863857
EPOR	2057	373	424	190.5	273	297.5	311.6	17	23	27	32	36	20	34	31	28	30	21	25	21	12	20	31	17	39	35	25	34	31	40	27	29	32	28	27	0.4805
PSEN2	5664	200	504	446	165.5	243	311.7	6	6	13	30	27	20	33	22	24	28	19	20	18	19	17	17	18	15	18	18	15	21	30	11	18	7	22	15	-0.164884
RUNX3	864	310	283	522	204	243	312.4	0	0	0	0	1	1	1	1	1	1	0	5	7	10	19	24	17	20	31	37	28	51	44	51	42	41	33	50	0.898104
NDP	4693	159	613	63	341	387.5	312.7	0	1	4	11	3	9	12	9	2	6	3	7	3	12	8	9	5	9	5	9	15	8	15	20	15	16	13	19	0.790025
NLRP1	22861	441	167	446	251	259	312.8	4	3	1	5	2	17	10	7	8	12	15	9	11	16	20	18	22	31	34	38	48	49	56	69	81	89	114	78	0.939793
JAK1	3716	129	70	816.5	251	297.5	312.8	0	0	0	3	8	8	10	17	11	4	10	3	6	8	2	6	6	13	13	11	20	23	24	34	26	39	62	65	0.867751
FGF21	26291	271	909	24.5	155.5	207	313.4	0	0	0	0	0	0	0	0	0	0	1	0	0	0	0	1	2	9	14	28	32	50	75	102	99	153	167	152	0.909045
GH1	2688	186	317	321.5	251	493.5	313.8	94	120	90	88	91	78	59	78	39	69	48	43	52	45	49	35	33	42	46	47	59	49	42	47	54	49	39	42	0.0525124
GAPDH	2597	411	139	816.5	98.5	106.5	314.3	46	31	44	38	38	59	49	50	59	60	47	44	51	61	53	49	43	47	56	65	52	59	59	81	60	78	53	57	0.568662
AGA	175	153	541	816.5	20	49.5	316	23	39	31	52	49	66	65	60	58	42	40	54	69	68	39	62	49	52	53	39	51	30	17	16	14	30	12	42	-0.709161
LYZ	4069	297	297	24.5	812	150.5	316.2	3	4	2	0	3	0	2	5	2	2	2	1	1	2	2	3	3	3	1	5	5	5	4	5	5	7	10	4	0.794848
FGF23	8074	412	578	271	135.5	190	317.3	0	0	0	0	0	0	1	2	1	1	3	10	11	14	27	53	31	44	41	66	89	97	139	147	160	137	184	160	0.959847
ITK	3702	327	358	496.5	192	215	317.7	7	9	14	10	13	17	19	18	19	8	11	13	15	23	17	13	32	38	41	52	75	119	140	175	215	246	356	432	0.881336
MECP2	4204	609	97	411.5	215.5	259	318.4	2	1	3	2	2	3	13	6	9	12	18	48	41	46	46	58	61	65	70	82	93	115	116	104	108	112	137	128	0.96845
CDH13	1012	264	307	480	251	297.5	319.9	6	14	12	15	9	10	14	10	13	17	7	9	15	13	19	19	19	17	18	24	13	13	25	21	14	27	13	25	0.541672
TNFRSF8	943	534	367	8	341	350	320	41	37	45	37	57	68	81	72	49	59	63	62	62	59	40	48	62	51	50	68	54	46	42	68	72	77	61	63	0.255784
TLR6	10333	81	425	123	479	493.5	320.3	0	0	0	0	0	0	0	0	0	0	0	2	0	1	3	5	3	2	5	3	6	4	4	6	10	3	7	9	0.79001
FBN1	2200	254	57	539	366.5	387.5	320.8	5	4	6	6	11	17	19	23	26	29	45	45	37	32	38	33	42	41	38	46	46	44	32	47	51	50	44	47	0.470624
PTN	5764	96	293	243	479	493.5	320.9	2	6	20	13	15	16	15	13	18	14	16	13	29	16	22	29	29	29	24	27	34	19	35	31	34	28	30	31	0.651758
ADA	100	323	674	307	126.5	177	321.5	110	119	127	105	114	134	123	111	120	117	101	87	109	92	79	96	89	80	76	78	109	91	122	108	110	102	92	92	0.241924
HLA-DRB1	3123	198	329	816.5	98.5	177	323.8	36	55	71	80	106	98	117	129	91	117	124	99	140	102	133	136	136	149	140	150	157	159	151	160	129	148	204	140	0.65658
IL12B	3593	136	124	425	479	459.5	324.7	0	2	5	1	2	0	1	0	0	0	1	4	7	4	8	4	4	9	14	7	4	16	23	20	5	11	16	14	0.647943
B2M	567	210	243	496.5	311.5	365	325.2	20	11	15	9	12	9	11	7	3	7	1	4	10	0	2	1	2	10	4	2	8	2	3	3	4	2	2	0	-0.16732
GNRH1	2796	288	776	36	388.5	142	326.1	120	103	88	82	62	61	46	45	45	31	44	29	34	20	29	26	19	24	22	35	25	18	22	23	20	18	23	17	-0.64521
TNFRSF25	8718	335	475	254	251	317	326.4	20	17	18	25	16	23	17	22	20	13	19	21	24	30	27	34	30	34	35	38	30	40	53	45	45	47	58	37	0.858189
IL37	27178	330	744	63	215.5	280	326.5	0	0	0	0	0	0	0	0	0	0	0	1	1	3	3	3	13	13	16	13	27	21	24	23	48	80	52	82	0.874959
FASN	2194	369	181	816.5	251	17.5	327	10	10	14	15	16	14	25	27	25	21	35	31	26	42	51	41	47	59	63	52	47	44	60	48	78	65	69	74	0.824289
CALD1	800	541	240	816.5	8	31.5	327.4	52	66	58	49	56	55	53	51	47	58	54	60	47	77	78	106	118	114	97	108	122	116	152	150	175	176	226	292	0.908911
CHI3L1	1116	494	792	113.5	87	150.5	327.4	0	0	1	9	5	11	9	6	1	9	12	11	7	14	6	12	15	20	24	31	43	44	52	60	87	82	79	64	0.92486
FLT3LG	2323	247	520	91	366.5	414	327.7	0	0	0	0	2	13	27	29	31	24	36	26	33	25	24	12	14	19	18	9	19	15	7	12	12	11	14	11	-0.79237
TRH	7200	218	883	46.5	215.5	280	328.6	225	200	203	144	150	155	121	120	110	102	81	75	84	63	74	82	63	70	63	68	62	50	51	52	59	62	55	40	-0.831607
CTSS	1520	291	289	333.5	366.5	365	329	0	3	3	3	5	2	3	2	5	9	3	9	11	10	7	11	17	16	14	15	30	16	27	19	29	20	31	36	0.874932
EPHB2	2048	300	229	383	732	9	330.6	2	4	5	1	3	2	7	0	2	7	4	9	3	4	9	8	9	8	12	9	5	13	7	16	14	16	18	13	0.776773
TLR8	51311	85	273	393.5	443	459.5	330.8	0	0	0	0	0	0	0	0	0	0	0	0	1	0	0	6	9	6	12	21	19	19	12	23	25	28	26	23	0.936742
UCP2	7351	614	436	39.5	251	317	331.5	0	0	0	0	0	0	0	13	29	48	28	35	37	35	38	38	30	39	51	49	44	43	61	57	49	59	54	58	0.873594
CCR2	729230	97	198	454	479	436	332.8	0	0	0	0	1	2	4	15	12	26	30	29	24	45	46	45	35	54	50	51	66	70	76	70	61	74	74	77	0.925068
ACE2	59272	354	159	816.5	146	190	333.1	1	3	1	0	0	0	2	0	0	2	2	1	4	11	23	45	52	43	81	44	58	53	72	78	79	87	71	57	0.862492
GPER1	2852	285	750	216.5	177.5	243	334.4	14	7	13	16	19	25	14	26	22	28	30	25	36	36	53	44	42	44	63	84	90	79	113	136	159	147	165	154	0.950518
HFE	3077	360	37	341.5	443	493.5	335	47	56	47	42	55	38	59	100	152	148	189	138	151	154	147	172	153	138	117	115	118	119	107	83	91	107	88	91	-0.895543
ADAM12	8038	237	196	307	443	493.5	335.3	0	0	0	0	0	0	1	5	3	4	12	4	5	9	6	15	7	10	18	14	20	10	23	21	13	19	14	10	0.554407
RORA	6095	32	165	203.5	614.5	664.5	335.9	0	0	0	1	0	3	2	3	5	3	9	10	3	5	10	8	7	9	18	12	21	23	23	29	30	48	33	42	0.899754
SH2D1A	4068	488	465	254	215.5	259	336.3	13	13	16	11	23	24	31	40	44	32	54	53	65	61	77	77	88	83	84	73	95	108	115	92	107	84	87	101	0.790367
DNMT1	1786	649	328	363	146	200	337.2	0	0	0	0	0	0	0	0	3	7	15	21	28	33	36	45	58	58	60	68	88	127	133	144	160	173	201	225	0.966125
ALOX5	240	295	212	816.5	155.5	207	337.2	56	82	72	67	73	77	61	58	66	40	38	45	60	50	53	73	68	63	65	72	79	75	78	77	94	68	67	76	0.767416
CCL26	10344	292	500	24.5	411	459.5	337.4	0	1	3	1	3	5	6	10	8	14	10	18	16	16	19	34	27	23	21	21	19	35	35	42	43	34	33	36	0.805003
HPGDS	27306	241	835	307	251	54.5	337.7	119	135	160	162	178	177	168	188	166	174	188	174	174	169	210	171	167	176	164	153	167	179	185	187	185	151	151	126	-0.47996
IL27	246778	298	781	372.5	87	150.5	337.8	3	0	0	1	4	8	2	3	1	0	2	5	4	11	28	22	21	29	34	40	42	48	70	84	78	77	88	73	0.96213
NRG1	3084	187	284	493	341	387.5	338.5	2	1	1	8	3	18	13	13	16	17	6	14	10	28	48	35	45	47	70	63	71	86	86	77	86	77	82	90	0.938717
STK11	6794	390	166	570	273	297.5	339.3	0	0	0	0	0	0	0	0	6	13	5	4	6	13	15	16	19	30	34	29	34	43	35	56	62	69	59	64	0.969071
NT5E	4907	313	86	816.5	215.5	269.5	340.1	70	68	68	76	68	69	69	80	92	79	100	81	98	102	110	108	130	111	126	115	149	155	177	200	180	164	183	169	0.911724
PRNP	5621	277	516	411.5	273	226.5	340.8	27	38	36	63	70	51	58	74	67	77	95	109	102	115	111	136	146	136	185	154	129	154	157	150	159	148	137	148	0.682132
PRG2	5553	334	106	816.5	215.5	243	343	8	13	11	18	15	17	19	30	21	22	30	15	22	14	15	11	19	11	19	18	23	15	18	16	25	21	15	20	0.0124547
MSR1	4481	211	170	406.5	443	493.5	344.8	3	2	4	1	2	0	2	2	4	4	3	7	4	13	15	15	10	10	15	12	16	18	14	19	23	15	21	16	0.789722
BGLAP	632	389	356	264	668	49.5	345.3	21	24	9	13	6	3	3	4	5	2	4	3	5	3	5	4	3	3	3	7	7	6	10	5	4	5	6	11	0.583813
CYP19A1	1588	158	312	816.5	341	101.5	345.8	2	6	3	3	5	2	4	11	14	5	12	16	11	11	18	20	23	30	22	28	20	27	27	28	27	36	26	30	0.838202
STAT4	6775	224	348	333.5	411	414	346.1	0	0	0	0	2	2	2	4	5	12	17	17	13	16	19	13	13	17	22	28	24	18	18	28	37	28	30	29	0.778043
OLR1	4973	284	246	406.5	388.5	414	347.8	0	0	0	0	4	0	0	1	8	6	14	22	13	13	24	25	28	25	31	41	43	44	39	46	52	48	43	55	0.94217
IL4R	3566	125	58	254	732	571	348	5	6	8	9	10	11	16	13	12	20	15	18	19	14	20	9	13	15	10	14	12	8	12	15	15	7	13	11	-0.526164
PSG1	5669	565	505	13.5	614.5	42.5	348.1	0	1	2	0	2	0	2	0	0	0	0	0	1	1	1	0	0	0	0	1	2	1	1	1	2	1	2	0	0.451532
AQP1	358	92	385	298	479	493.5	349.5	0	0	4	16	18	18	9	17	11	13	18	15	18	18	14	21	24	22	24	21	30	23	26	35	21	44	38	28	0.774568
KL	9365	325	476	515	192	243	350.2	0	0	0	0	0	0	0	1	7	3	15	6	17	9	14	15	25	21	28	30	56	63	75	103	93	109	135	151	0.931634
PRKAB1	5564	445	483	157	311.5	365	352.3	0	0	0	0	1	0	0	2	0	4	5	1	6	23	25	31	64	63	121	125	192	249	271	352	405	491	572	622	0.94468
IL1RL1	9173	678	241	72.5	388.5	387.5	353.5	0	1	1	1	2	3	3	2	2	7	5	8	5	8	5	7	6	11	12	14	21	21	36	51	37	58	52	45	0.899984
ACTN4	81	216	291	500.5	443	317	353.5	0	1	0	1	1	0	2	0	4	5	10	9	4	10	16	11	11	14	17	18	22	16	19	39	33	27	38	28	0.866147
ARHGEF7	8874	657	606	372.5	44	88.5	353.6	8	11	35	38	46	48	52	53	55	54	43	50	48	56	66	53	62	59	58	73	58	52	56	58	51	55	51	45	-0.00302687
IL17D	53342	545	929	46.5	109	142	354.3	0	0	0	0	0	0	0	0	0	0	0	0	1	5	15	13	14	21	24	30	33	39	55	64	65	64	74	67	0.976404
REN	5972	414	271	82	952.5	62.5	356.4	4	3	5	7	10	5	4	9	5	6	4	8	11	6	14	17	13	23	10	10	17	18	18	12	17	23	16	12	0.551646
KLK4	9622	482	568	190.5	251	297.5	357.8	89	82	141	65	78	60	98	79	77	87	85	72	78	75	77	79	98	75	87	73	77	84	81	88	97	68	86	83	0.219866
LTF	4057	228	177	341.5	952.5	93	358.4	5	4	7	2	8	2	1	1	2	0	0	1	0	0	0	0	4	2	2	1	2	4	3	7	4	6	1	4	0.695023
HSD11B1	3290	359	308	816.5	126.5	190	360	0	0	0	2	0	0	4	9	3	6	10	13	20	29	30	24	43	47	50	49	30	12	6	5	5	8	3	3	-0.407309
TSPO	706	570	652	262	126.5	190	360.1	42	47	35	30	50	35	27	39	32	39	36	41	39	43	54	70	81	80	76	116	106	141	190	154	174	223	211	211	0.963104
CUX1	1523	521	256	816.5	69	142	360.9	29	40	58	47	70	63	88	117	119	125	89	101	114	134	110	149	116	142	142	149	139	127	138	155	162	146	159	114	0.632111
MCAM	4162	415	230	282.5	443	436	361.3	0	0	0	3	2	0	3	4	5	5	4	7	2	10	7	13	12	10	16	15	11	15	25	31	33	31	44	46	0.915617
CYP3A4	1576	462	172	816.5	215.5	142	361.6	2	1	9	4	13	11	26	23	32	32	42	29	33	43	64	55	50	31	51	56	67	56	56	65	63	63	55	67	0.708048
UCN	7349	273	808	69	311.5	350	362.3	2	3	0	4	2	4	11	15	28	39	50	39	54	40	61	68	56	50	34	44	43	42	29	45	40	41	30	23	-0.608696
MYLK	4638	135	107	816.5	366.5	387.5	362.5	29	41	39	20	29	38	36	40	38	33	44	33	27	25	39	39	37	31	34	30	31	39	27	47	35	60	57	44	0.503424
ASAH1	427	383	437	816.5	69	116	364.3	3	3	8	1	1	4	2	1	3	6	6	6	5	7	7	12	10	10	15	11	4	18	19	23	7	18	29	25	0.766824
SFTPD	6441	257	583	534	192	259	365	1	8	11	10	14	9	5	6	12	18	19	24	32	26	32	31	31	33	31	32	31	30	43	43	37	39	34	41	0.79795
IL25	64806	610	527	307	165.5	226.5	367.2	0	0	0	0	0	0	0	0	0	0	0	1	1	2	2	2	8	5	5	6	11	14	10	17	21	27	36	29	0.912059
GATA6	2627	238	362	147	521.5	571	367.9	0	0	0	0	0	0	2	0	1	2	3	3	1	1	2	7	5	4	5	7	6	8	15	14	19	15	9	14	0.845637
SOCS1	8651	352	309	816.5	155.5	207	368	0	0	0	3	0	1	3	2	9	13	21	24	26	39	52	41	47	30	54	46	42	52	63	68	62	66	69	85	0.902716
IFNAR1	3454	498	202	333.5	192	614.5	368	21	18	16	40	27	21	24	31	25	20	24	17	13	13	21	31	19	21	17	16	14	22	16	19	22	33	22	27	0.343141
DRD2	1813	305	562	453	251	269.5	368.1	61	87	83	97	97	70	84	74	74	75	102	90	48	75	56	78	67	85	75	78	84	69	85	96	76	103	81	90	0.309484
YAP1	10413	490	242	506	288.5	317	368.7	1	3	1	4	8	7	4	13	12	8	13	10	6	10	12	14	13	17	25	20	33	53	58	97	146	225	263	338	0.819116
ADRA1D	146	269	491	77	479	531	369.4	9	16	7	7	15	28	37	58	65	71	57	65	66	64	71	75	102	81	72	92	86	60	53	59	74	60	66	78	-0.01406
AGTR2	186	448	264	203.5	443	493.5	370.4	0	9	11	21	20	32	42	27	43	45	30	30	32	44	54	57	34	22	39	30	42	19	41	37	43	38	30	29	-0.133633
CYP2C9	1559	201	111	816.5	311.5	414	370.8	2	0	2	5	5	10	4	13	18	12	16	30	43	36	65	50	37	43	54	47	56	48	48	57	52	51	31	51	0.419513
HLA-DQB1	3119	103	506	446	388.5	414	371.5	15	27	32	37	49	46	45	35	42	47	43	38	43	28	39	40	33	41	32	42	26	36	39	48	43	46	43	41	0.277989
PTPN1	5770	281	133	816.5	311.5	317	371.8	0	0	2	2	4	1	4	5	16	12	14	16	27	32	38	32	41	47	41	43	52	46	66	71	73	75	59	90	0.943337
CXCR3	2833	489	482	110.5	366.5	414	372.4	0	0	0	0	0	0	0	0	6	8	10	23	22	36	41	42	45	49	61	49	35	49	51	40	41	58	57	55	0.73928
IL17B	27190	557	738	1	251	317	372.8	0	0	0	0	0	0	0	0	0	0	1	2	2	1	7	6	9	8	8	12	7	9	13	14	12	11	19	16	0.916282
SCG2	7857	673	420	110.5	311.5	350	373	4	9	14	13	10	16	12	8	11	11	3	3	4	5	4	2	6	4	7	3	7	4	4	2	5	3	2	3	-0.131349
CASR	846	361	260	282.5	668	297.5	373.8	0	5	7	5	4	6	15	20	20	31	40	27	42	36	57	50	53	54	64	74	78	90	74	93	84	92	96	82	0.932646
ATRX	546	398	360	568.5	251	297.5	375	0	2	4	2	3	6	9	8	8	15	17	5	12	12	16	17	20	23	19	28	19	40	29	31	35	49	39	55	0.901207
SGK1	6446	251	258	539	443	387.5	375.7	0	0	0	1	1	1	1	1	2	10	13	12	19	22	21	30	27	23	30	29	30	28	25	35	37	47	43	37	0.892976
G6PD	2539	279	400	548	341	317	377	87	95	75	77	76	79	62	57	63	67	57	62	66	71	57	76	65	78	76	63	68	71	74	107	105	118	122	128	0.843085
VTN	7448	34	1041	446	177.5	190	377.7	43	58	45	46	48	49	50	50	41	41	33	41	42	27	23	21	23	24	24	21	22	24	21	27	23	29	30	21	-0.469389
PDCD4	27250	660	372	110.5	366.5	387.5	379.3	0	0	0	0	0	0	0	0	0	3	0	3	1	6	7	4	6	9	13	18	26	23	30	41	51	28	59	46	0.920393
MX1	4599	464	322	489.5	288.5	334.5	379.7	2	5	6	4	6	14	7	12	9	14	7	11	11	8	19	13	16	25	8	10	13	13	17	14	16	23	19	23	0.580726
IQGAP1	8826	151	175	574	567	436	380.6	0	2	1	0	2	0	2	4	2	5	1	5	8	5	7	12	7	9	14	7	18	19	18	24	19	16	22	30	0.901323
GAL	51083	235	775	46.5	411	436	380.7	55	69	78	77	75	75	79	80	88	80	99	91	80	83	80	78	68	64	84	61	72	78	80	90	88	88	113	122	0.368331
TNFSF4	7292	84	854	103	411	459.5	382.3	0	1	0	0	1	0	2	2	1	4	4	4	2	1	4	1	5	1	5	8	3	8	6	8	10	3	17	12	0.698626
MKI67	4288	597	254	816.5	230.5	14.5	382.5	44	62	58	62	79	125	155	137	164	132	130	130	129	124	140	133	114	113	102	127	144	161	191	210	231	262	262	269	0.837115
F11R	50848	440	247	522	341	365	383	5	5	9	9	15	10	12	9	45	85	113	66	66	69	74	70	90	86	81	91	79	82	102	113	95	121	168	158	0.71262
GSTM1	2944	114	693	816.5	118	177	383.7	13	15	15	18	18	37	40	32	38	46	50	51	55	54	63	64	67	59	58	75	72	68	91	92	61	60	58	46	0.300948
BID	637	268	96	393.5	812	350	383.9	0	0	0	0	0	0	0	0	0	0	0	0	0	0	0	0	0	0	0	0	0	0	0	0	0	0	0	0	#VALUE!
CCR4	1233	472	459	237	366.5	387.5	384.4	1	0	1	1	2	2	1	3	5	7	8	18	23	13	21	24	29	33	25	31	25	31	32	42	37	41	45	39	0.907889
IL19	29949	355	576	63	443	493.5	386.1	0	0	0	0	0	0	0	0	1	0	1	0	1	3	3	3	5	4	6	2	6	10	10	9	10	8	8	6	0.829773
HLA-DPB1	3115	265	402	425	411	436	387.8	30	24	46	44	31	32	27	16	25	16	17	20	14	17	18	18	19	11	13	17	19	25	32	20	42	24	25	23	0.573993
SOD3	6649	270	422	157	521.5	571	388.3	1	0	3	0	2	0	0	1	0	1	1	5	4	1	4	5	1	6	4	4	2	4	12	5	4	4	6	9	0.494816
TACR1	6869	555	394	316.5	311.5	365	388.4	14	15	34	56	54	47	55	38	64	52	54	48	51	63	47	46	45	69	58	72	59	74	63	73	77	77	62	80	0.759376
WISP1	8840	646	300	63	443	493.5	389.1	0	0	0	0	0	0	0	0	0	0	1	4	1	4	1	0	2	6	3	5	2	9	5	11	10	13	21	13	0.816489
PTGIS	5740	168	393	106	614.5	664.5	389.2	2	1	0	1	7	3	6	9	1	14	8	5	16	8	7	10	9	12	8	10	8	3	5	5	2	7	2	9	-0.476023
SELPLG	6404	207	272	816.5	215.5	436	389.4	1	3	3	4	3	13	16	32	18	22	30	36	49	59	55	49	41	46	39	51	34	41	43	34	25	38	41	33	-0.399087
ITGA4	3676	163	115	816.5	521.5	334.5	390.1	0	0	0	1	1	1	2	1	2	2	2	2	0	4	0	2	3	1	6	3	3	3	2	2	5	3	6	6	0.588782
STIM1	6786	225	688	468	273	297.5	390.3	3	5	5	4	4	7	4	5	7	11	6	4	6	3	9	9	22	28	46	51	39	43	54	70	62	62	53	77	0.944918
MAP3K5	4217	311	160	473	521.5	493.5	391.8	0	0	0	0	0	0	0	3	7	5	6	19	15	29	21	29	24	34	34	35	39	30	33	42	40	48	58	53	0.921094
NFATC3	4775	322	349	237	521.5	531	392.1	0	0	0	0	0	1	0	3	3	1	0	2	5	4	2	3	1	4	4	3	3	5	3	2	7	2	2	7	0.379533
CHRM3	1131	399	599	522	192	259	394.2	5	11	6	4	8	8	8	7	5	8	10	8	6	7	6	14	32	22	19	33	36	52	72	61	62	83	78	74	0.944777
NOD1	10392	377	528	134	443	493.5	395.1	0	0	0	0	0	0	0	0	0	1	0	2	0	5	3	9	13	16	8	18	19	15	22	24	15	23	19	23	0.901979
COL11A2	1302	145	407	816.5	273	334.5	395.2	3	3	2	1	4	4	9	8	10	25	22	31	23	44	47	48	62	54	75	101	133	156	180	190	218	243	273	344	0.951681
STS	412	757	692	372.5	55	111	397.5	26	41	26	20	28	24	41	25	27	37	37	41	51	58	62	40	54	86	56	67	72	79	86	86	108	107	121	111	0.921469
BDKRB2	624	382	119	477.5	521.5	493.5	398.7	0	1	3	1	1	0	1	5	2	2	4	1	0	3	3	1	3	0	3	2	2	3	4	2	6	2	1	5	0.316684
IER3	8870	465	279	157	521.5	571	398.7	1	1	0	1	0	0	0	0	1	1	1	2	4	4	0	2	4	4	4	2	2	4	3	1	5	8	5	4	0.491333
IL32	9235	296	981	190.5	230.5	297.5	399.1	0	0	1	0	0	0	2	0	0	0	0	2	6	3	5	8	9	7	15	13	19	24	22	36	32	35	21	31	0.920367
IAPP	3375	573	831	97.5	215.5	280	399.4	60	60	90	64	60	70	67	94	90	77	101	85	104	98	117	85	78	96	113	91	118	123	124	149	147	129	126	130	0.738818
PIAS1	8554	349	211	363	614.5	459.5	399.4	0	1	0	0	2	1	2	3	5	9	7	8	8	5	9	5	6	7	6	7	10	12	13	10	22	5	16	12	0.570978
ADRB1	153	83	164	522	614.5	614.5	399.6	17	5	9	21	17	19	18	11	11	20	24	20	26	34	25	29	37	32	33	24	29	8	6	12	7	9	7	5	-0.725557
CEACAM5	1048	455	972	406.5	118	49.5	400.2	92	87	67	71	70	69	49	47	46	60	61	52	46	38	55	36	46	65	62	43	69	49	59	73	83	91	84	73	0.712142
CYCS	54205	139	163	816.5	668	215	400.3	17	17	13	15	24	29	19	14	24	12	19	23	22	17	20	28	15	17	20	13	16	18	22	12	17	19	24	17	-0.231509
CFL1	1072	456	531	383	341	297.5	401.7	9	4	5	10	9	13	36	29	25	35	34	31	38	37	51	42	61	62	56	50	69	60	76	71	89	87	83	82	0.94053
GRK5	2869	143	326	237	732	571	401.8	0	0	0	1	3	1	3	2	3	2	1	2	4	0	5	2	3	3	6	6	4	8	14	13	12	12	10	4	0.7402
LGALS9	3965	621	625	135.5	311.5	317	402	0	0	0	0	0	0	0	2	1	2	4	1	10	3	2	10	7	11	13	15	17	16	33	37	34	29	30	49	0.911267
NCF1	653361	215	238	539	567	459.5	403.7	2	2	3	3	12	11	10	9	3	2	10	8	11	19	8	16	12	10	9	9	7	8	10	11	4	11	11	3	-0.421598
TAC1	6863	422	484	166	288.5	664.5	405	6	10	18	45	31	28	16	22	22	14	19	22	17	17	21	18	17	21	25	12	20	14	26	13	18	25	25	26	0.287028
ENO2	2026	356	462	816.5	177.5	226.5	407.7	48	38	37	37	41	34	31	29	34	29	29	31	19	30	28	27	32	21	22	30	29	37	48	45	47	45	47	56	0.807034
F12	2161	148	65	816.5	479	531	407.9	16	10	25	17	18	13	9	13	14	10	11	12	13	7	17	9	14	13	7	15	29	13	12	16	19	33	20	33	0.658523
TCN2	6948	502	331	816.5	165.5	226.5	408.3	6	3	6	7	9	9	7	12	13	3	6	13	9	8	11	4	10	7	9	9	15	6	7	8	13	13	10	15	0.368628
NME1	4830	487	667	473	192	226.5	409.1	7	22	26	44	59	45	65	65	70	50	63	61	76	92	84	78	93	76	98	91	60	70	70	71	63	73	56	77	-0.238131
PLAG1	5324	353	567	123	952.5	54.5	410	0	0	0	0	0	0	0	0	1	2	2	2	1	0	3	4	1	2	5	1	2	4	7	9	4	2	7	5	0.604206
BAX	581	256	137	581	952.5	124	410.1	0	0	0	0	0	0	0	0	0	0	0	0	1	0	0	0	0	0	0	1	0	0	0	0	0	0	0	0	-0.20444
CD8A	925	155	717	393.5	614.5	177	411.4	34	28	37	35	33	34	36	33	23	56	41	35	34	47	43	42	43	44	54	54	57	54	42	60	81	67	68	78	0.862216
APLN	8862	582	859	123	215.5	280	411.9	0	0	0	2	1	1	0	0	0	1	7	4	9	10	10	16	24	40	39	47	60	61	77	91	89	105	100	112	0.981158
ACOD1	730249	955	1001	54.5	13.5	36.5	412.1	19	28	26	18	32	25	33	30	28	39	37	41	36	60	62	93	89	105	85	96	112	106	143	140	167	167	220	285	0.920923
CXCL14	9547	144	398	13.5	732	784.5	414.4	0	0	0	2	0	0	0	1	0	2	2	2	0	1	1	3	3	2	6	10	15	9	10	11	11	18	5	13	0.794873
SDC4	6385	442	52	527	521.5	531	414.7	0	0	1	2	2	1	0	4	5	8	7	11	18	11	12	12	11	11	13	18	14	18	19	21	26	21	23	18	0.80391
GNAS	2778	166	82	562.5	732	531	414.7	6	11	9	5	13	18	13	19	24	26	34	35	33	26	23	31	29	36	44	36	45	44	52	68	68	77	49	69	0.837554
ABCC1	4363	419	390	515	366.5	387.5	415.6	6	11	14	21	57	49	76	81	104	96	118	130	128	134	122	138	110	139	142	144	127	153	174	166	171	163	154	164	0.813067
GLP1R	2740	574	158	816.5	251	280	415.9	1	4	5	10	14	12	28	23	24	16	19	16	22	28	26	42	33	39	57	74	97	143	154	188	263	270	259	318	0.933294
XRCC1	7515	857	675	346	77.5	128.5	416.8	8	14	5	6	10	16	19	17	11	15	14	19	20	23	27	41	41	51	57	58	63	81	102	117	108	114	80	87	0.919161
SERPINB3	6317	517	666	483.5	177.5	243	417.4	33	30	26	26	26	19	29	29	33	25	32	28	21	25	27	40	35	22	38	33	43	41	65	44	55	56	46	51	0.79373
SHBG	6462	628	538	816.5	36.5	75.5	418.9	63	42	46	40	32	54	40	44	47	39	46	48	38	41	40	48	41	49	53	57	63	53	71	74	76	63	74	91	0.886343
SMPD1	6609	432	401	254	479	531	419.4	4	10	7	7	6	9	9	8	14	13	24	24	23	19	23	23	31	20	29	29	37	37	40	44	35	61	69	56	0.859099
CR1	1378	128	219	816.5	443	493.5	420	32	19	25	24	21	25	34	30	22	31	21	14	16	11	19	20	19	13	22	19	15	29	24	15	11	18	12	14	-0.0892626
TINAGL1	64129	672	210	353.5	411	459.5	421.2	1	0	0	0	0	0	0	1	0	1	1	1	2	0	2	1	0	0	4	3	1	3	3	5	8	5	1	5	0.632727
CTF1	1489	409	486	123	521.5	571	422.1	0	0	1	0	1	4	9	8	7	12	17	16	13	14	9	15	15	13	18	11	13	21	13	31	22	31	23	30	0.686259
PRKG1	5592	283	98	468	732	531	422.4	1	0	0	0	1	1	2	0	1	4	2	5	5	7	8	8	10	18	18	18	31	20	25	24	26	38	29	23	0.903343
CCR7	1236	473	644	359	288.5	350	422.9	0	0	1	1	6	1	7	5	10	11	5	12	13	25	33	33	37	46	38	39	42	47	49	63	60	54	56	57	0.934767
NCOR2	9612	561	35	816.5	411	297.5	424.2	3	3	2	3	2	2	2	8	9	10	7	9	6	7	13	12	9	12	13	15	10	16	10	20	14	26	20	28	0.824285
ITGAV	3685	64	27	557	812	664.5	424.9	0	1	0	2	1	1	1	2	0	0	2	1	0	0	1	1	1	4	0	2	2	1	0	2	3	4	6	8	0.653099
ADRA2A	150	59	468	316.5	668	614.5	425.2	1	1	1	1	2	2	1	10	4	8	11	9	7	6	4	5	6	4	8	2	6	4	4	4	3	7	8	1	-0.50782
AZU1	566	458	510	190.5	479	493.5	426.2	8	12	6	8	9	7	12	11	9	14	8	18	12	8	14	7	6	7	11	8	16	11	9	16	16	12	20	18	0.459371
HLA-DQA1	3117	165	450	425	521.5	571	426.5	13	30	34	33	40	42	38	46	28	31	33	24	26	15	24	20	23	14	9	16	9	8	13	13	14	12	13	14	-0.736131
RNASE3	6037	759	961	157	98.5	159.5	427	5	31	20	27	34	34	41	43	36	51	28	35	32	26	19	24	26	28	17	19	27	27	23	24	23	23	22	23	-0.478612
CYP2C18	1562	318	71	816.5	443	493.5	428.4	2	1	3	2	4	5	3	6	9	2	6	3	3	4	9	5	5	4	7	2	5	2	8	3	2	3	1	3	-0.382638
ELN	2006	433	275	816.5	521.5	96.5	428.5	7	13	11	8	9	12	10	5	12	13	5	10	9	5	12	15	8	12	9	17	18	12	15	12	17	17	15	20	0.765275
RAI1	10743	715	487	77	411	459.5	429.9	42	37	30	19	16	17	7	8	7	5	4	7	6	5	8	13	10	12	21	16	28	33	45	37	51	56	57	56	0.954383
CA2	760	250	537	816.5	251	297.5	430.4	17	30	21	34	39	34	23	25	33	22	29	19	22	18	30	35	34	40	38	38	43	31	44	52	48	47	45	40	0.824686
PLA2G1B	5319	682	770	146	388.5	167.5	430.8	3	5	4	6	4	7	13	20	18	17	5	7	7	10	9	14	4	15	10	13	4	7	12	12	6	6	6	8	-0.0369177
CCR3	1232	374	580	110.5	521.5	571	431.4	0	0	0	0	0	0	3	15	13	20	18	20	19	17	9	18	23	16	10	19	18	14	14	14	11	6	16	11	-0.533538
AGER	177	286	286	243	479	869.5	432.7	6	4	13	3	10	6	10	20	15	14	18	25	25	42	47	51	53	84	98	87	105	112	148	150	164	150	179	172	0.983558
CD276	80381	767	515	63	388.5	436	433.9	0	0	3	3	13	6	8	8	14	6	20	11	16	15	17	18	17	20	17	15	14	17	24	29	26	31	42	35	0.779684
MFGE8	4240	364	387	237	567	614.5	433.9	1	2	3	7	6	4	1	3	4	3	2	1	3	3	6	10	7	9	14	13	6	12	19	24	9	16	12	19	0.791075
S1PR1	1901	236	352	307	668	614.5	435.5	0	0	0	0	1	0	1	1	6	4	9	10	5	9	16	14	19	31	29	19	39	34	44	40	58	56	71	57	0.946765
SCN5A	6331	606	216	816.5	479	62.5	436	1	0	0	1	3	2	3	1	5	5	13	9	18	20	20	27	21	34	25	28	24	30	45	39	61	37	43	44	0.860907
BIRC5	332	208	143	353.5	812	664.5	436.2	0	0	0	0	1	1	0	0	0	4	3	3	0	3	1	2	2	1	2	4	2	7	6	3	5	3	8	3	0.555657
PADI4	23569	536	410	816.5	177.5	243	436.6	30	28	28	37	37	34	42	44	53	39	49	41	34	53	66	75	83	84	83	100	109	129	140	143	147	171	172	209	0.976747
F13A1	2162	146	26	190.5	952.5	869.5	436.9	3	3	4	1	1	3	3	1	3	5	4	2	4	2	5	1	3	0	1	2	4	5	3	4	4	4	6	6	0.462595
HPSE	10855	550	664	816.5	23	142	439.1	56	77	79	69	85	98	74	80	89	101	102	103	111	140	144	178	170	179	197	169	221	176	250	249	263	235	223	248	0.923035
CYP2D6	1565	309	447	816.5	288.5	334.5	439.1	2	11	5	27	31	38	64	52	57	67	65	54	57	66	55	69	69	74	76	79	78	69	105	105	105	94	95	97	0.876564
WNK1	65125	563	188	816.5	614.5	14.5	439.3	20	27	36	42	37	25	32	31	18	26	40	35	36	57	72	65	69	65	64	70	78	93	97	113	103	129	100	105	0.926772
NPPB	4879	622	681	446	192	259	440	4	2	8	7	4	10	7	6	7	14	14	16	19	42	65	60	70	78	68	74	83	54	59	46	68	45	45	47	0.367316
PTS	5805	601	458	816.5	135.5	190	440.2	6	8	6	6	7	8	17	9	21	15	21	27	17	16	9	19	10	10	21	20	18	19	10	19	19	21	46	17	0.264041
NPEPPS	9520	639	423	282.5	812	49.5	441.2	0	0	0	0	0	0	0	0	0	2	0	0	0	0	0	0	0	0	0	0	0	2	0	0	0	0	0	0	0.116871
GGT1	2678	142	524	816.5	341	387.5	442.2	10	15	8	5	15	5	6	5	7	7	9	3	8	6	7	10	7	18	8	7	13	10	13	25	17	16	16	7	0.56812
FHL2	2274	177	478	254	732	571	442.4	0	0	0	0	0	0	0	1	0	0	5	3	7	5	5	3	4	5	7	6	7	8	8	11	5	12	10	9	0.742398
ANTXR1	84168	405	245	425	567	571	442.6	6	3	7	5	11	11	7	14	10	19	23	34	25	42	58	85	103	98	82	120	97	127	108	153	111	143	144	171	0.936697
GC	2638	524	125	816.5	177.5	571	442.8	17	19	18	18	16	24	11	10	15	20	16	17	20	13	18	16	22	19	27	35	29	42	36	52	71	66	60	62	0.913829
NEDD4	4734	110	218	816.5	614.5	459.5	443.7	0	0	0	0	0	0	1	3	5	2	6	8	6	4	6	4	6	4	11	6	16	8	14	13	19	19	18	33	0.807027
SCGB1A1	7356	518	479	42.5	567	614.5	444.2	15	13	11	9	14	8	9	10	17	10	30	6	13	10	11	20	10	14	9	12	2	13	3	12	4	16	8	7	-0.432115
SOAT1	6646	371	614	816.5	204	226.5	446.4	23	18	20	17	44	149	203	213	256	345	388	356	371	426	470	447	494	532	545	583	625	749	880	1059	1049	1184	1327	1479	0.9383
SFTPC	6440	348	757	190.5	443	493.5	446.4	4	14	21	10	14	21	16	10	14	13	9	26	25	22	25	26	28	28	26	38	32	55	86	81	153	204	178	232	0.849858
TPT1	7178	694	395	353.5	411	387.5	448.2	20	14	30	21	22	21	35	40	40	48	42	34	26	25	33	29	32	27	42	32	44	65	63	61	43	53	34	64	0.641531
PDE4B	5142	443	214	307	668	614.5	449.3	0	0	0	0	0	0	0	2	0	3	1	0	3	1	1	4	2	3	10	6	5	7	5	9	5	7	17	14	0.811211
PSG2	5670	927	992	36	118	177	450	92	88	66	71	70	69	48	45	46	59	59	52	47	37	55	34	45	62	61	42	70	45	56	75	82	90	85	71	0.692722
REG3A	5068	585	430	223.5	230.5	784.5	450.7	44	44	46	46	44	49	56	66	84	69	75	74	81	90	96	97	71	78	86	93	92	97	115	151	129	113	117	151	0.807477
NF2	4771	397	315	816.5	366.5	365	452	49	55	52	47	40	64	37	55	68	75	74	70	67	62	50	67	61	74	69	58	77	73	66	47	80	80	63	72	0.149961
F11	2160	178	87	816.5	521.5	664.5	453.5	64	88	75	67	79	70	67	52	73	49	71	56	62	66	74	74	71	67	71	50	79	54	79	91	97	75	112	89	0.62781
CBS	875	219	103	816.5	567	571	455.3	8	13	10	12	4	21	14	19	30	20	23	30	18	18	29	23	27	17	40	36	33	41	35	31	30	38	44	33	0.669417
HAVCR2	84868	426	863	123	411	459.5	456.5	0	0	0	0	0	0	0	0	0	0	0	0	1	2	4	4	7	7	10	14	21	33	48	43	52	69	67	84	0.934626
AOC3	8639	261	442	489.5	521.5	571	457	8	4	8	6	15	15	7	11	22	16	22	22	26	23	21	26	28	28	25	14	21	26	24	29	15	16	19	21	-0.325974
BCHE	590	438	684	458.5	341	365	457.3	95	92	94	96	77	85	73	76	82	97	87	99	113	129	111	168	136	150	159	134	167	161	144	208	173	171	193	181	0.855929
PC	5091	425	534	393.5	668	269.5	458	2	17	5	8	8	13	12	14	14	9	9	10	15	5	9	9	9	12	8	10	13	16	10	21	19	11	14	15	0.565831
ORM1	5004	372	180	72.5	952.5	719.5	459.3	6	2	3	2	6	3	1	3	3	1	3	0	2	2	2	2	2	5	3	4	3	4	8	11	13	7	17	9	0.809792
DFFB	1677	875	573	816.5	9.5	33.5	461.5	19	28	26	18	32	25	33	31	31	46	42	49	42	64	63	103	94	109	87	97	114	106	145	143	168	171	222	284	0.914477
SPINT2	10653	508	707	816.5	109	167.5	461.6	0	0	0	0	0	0	0	3	1	1	1	3	1	2	0	1	1	5	2	5	4	1	3	4	8	7	4	6	0.699656
GAB1	2549	586	138	190.5	732	664.5	462.2	0	0	0	0	0	0	1	2	3	6	10	14	6	8	10	8	6	4	5	5	5	4	5	7	4	13	10	7	-0.215316
FABP3	2170	737	540	223.5	388.5	436	465	3	7	10	4	11	8	10	6	7	9	11	6	9	11	15	21	19	17	18	19	28	30	24	44	32	32	27	23	0.810351
GSTA1	2938	222	619	157	668	664.5	466.1	2	1	2	4	0	2	1	4	6	2	0	4	0	1	1	1	2	2	3	0	1	4	5	2	4	3	5	5	0.656737
SELENBP1	8991	654	519	816.5	146	200	467.1	0	6	6	0	1	4	2	6	6	8	10	5	4	2	6	7	9	6	12	15	14	12	14	18	19	25	22	27	0.904743
PLA2G7	7941	501	477	307	521.5	531	467.5	4	17	8	16	32	12	20	26	24	34	22	21	16	26	25	21	19	21	23	24	18	19	21	22	25	28	20	17	0.0171987
MAVS	57506	617	481	101.5	567	571	467.5	5	2	1	2	1	3	1	0	3	1	1	3	11	5	13	17	20	9	18	27	28	29	39	36	43	58	60	62	0.955963
CCS	9973	500	457	372.5	479	531	467.9	1	2	1	2	3	4	1	4	2	8	9	3	3	8	5	7	9	6	7	11	17	17	15	17	11	15	15	13	0.777434
CETP	1071	509	235	816.5	366.5	414	468.2	16	19	22	27	43	43	44	39	39	42	34	47	41	55	44	36	47	65	65	65	63	67	78	57	58	53	65	54	0.604498
CCL28	56477	174	566	91	732	784.5	469.5	7	5	9	9	7	9	17	9	14	26	22	27	22	16	30	33	40	43	38	31	43	41	43	48	39	46	45	25	0.638616
MEFV	4210	511	777	468	230.5	365	470.3	2	1	4	9	12	25	20	29	27	31	35	49	46	52	41	63	60	60	55	76	73	86	98	101	93	128	120	104	0.938015
FCER2	2208	118	833	816.5	273	317	471.5	36	65	57	66	57	48	41	41	32	28	23	22	24	19	17	22	12	15	15	14	17	17	17	15	6	11	10	8	-0.829048
CORIN	10699	403	494	77	668	719.5	472.3	0	0	1	0	0	1	0	0	1	1	3	1	4	6	5	3	6	11	14	17	18	17	17	28	21	34	31	20	0.913486
GCH1	2643	332	327	425	614.5	664.5	472.6	2	3	7	15	6	15	19	20	26	19	18	13	16	15	19	17	15	14	19	19	13	20	13	16	16	15	11	13	-0.319126
LHB	3972	106	642	106	732	784.5	474.1	3	4	2	2	5	7	5	7	1	1	2	4	4	3	2	2	2	2	6	1	6	4	4	6	3	1	4	3	0.154788
HLA-G	3135	379	590	534	411	459.5	474.7	5	4	3	7	10	14	15	29	14	59	44	30	28	66	36	47	49	77	50	64	47	70	59	69	87	68	91	64	0.737084
FGF5	2250	73	547	237	732	784.5	474.7	2	5	2	3	3	1	3	5	6	2	2	7	1	2	0	1	1	2	2	1	2	3	0	3	4	8	14	6	0.494227
VCL	7414	206	262	560.5	732	614.5	475	20	15	23	18	13	17	24	22	19	14	6	11	10	9	22	11	18	15	14	19	29	17	24	32	42	32	19	28	0.777737
ENO1	2023	452	337	816.5	443	334.5	476.6	3	5	3	10	5	10	24	33	16	21	33	38	36	32	32	45	50	47	44	56	64	43	43	46	52	58	62	63	0.79008
IL5RA	3568	522	50	425	668	719.5	476.9	0	0	0	0	1	0	0	0	0	0	1	3	0	0	0	0	0	2	2	1	0	0	0	0	1	1	0	5	0.161184
PDIA3	2923	182	249	816.5	567	571	477.1	2	5	11	2	9	10	14	15	8	17	7	6	21	10	8	12	9	17	7	18	14	14	14	18	19	29	16	4	0.376495
HADHA	3030	340	392	123	812	719.5	477.3	0	1	0	2	5	2	4	3	5	13	7	8	8	7	8	3	9	7	7	7	9	14	7	4	14	13	16	19	0.6396
S100A12	6283	711	901	167.5	273	334.5	477.4	48	61	88	60	66	65	51	56	45	44	53	50	44	57	56	45	39	53	47	48	63	54	62	76	62	75	57	66	0.64731
DST	667	381	217	816.5	443	531	477.7	30	31	20	22	24	25	26	18	27	17	12	17	18	23	30	18	26	21	32	35	42	46	48	50	75	74	69	85	0.940578
ATR	545	551	204	539	567	531	478.4	4	1	7	4	8	8	8	10	10	23	25	37	22	40	60	84	99	97	84	116	90	120	104	147	112	143	134	165	0.934825
CCL18	6362	119	1041	5	614.5	614.5	478.8	2	0	0	1	2	4	12	13	15	17	10	11	10	20	19	22	19	20	14	17	16	16	18	30	20	21	25	17	0.565293
MSH3	4437	493	285	816.5	388.5	414	479.4	27	41	38	37	33	24	32	15	30	25	34	35	30	28	37	32	30	30	23	23	26	31	27	35	26	26	32	28	-0.37858
PRKAR1A	5573	302	187	816.5	812	280	479.5	1	3	0	1	0	2	1	3	3	2	4	1	6	5	5	4	10	8	14	7	13	14	19	9	28	17	24	20	0.85749
IL16	3603	274	440	353.5	668	664.5	480	0	0	0	1	0	1	9	8	10	13	16	11	6	13	12	11	11	8	1	7	9	9	7	11	10	18	9	16	0.0755299
PRSS8	5652	347	145	816.5	521.5	571	480.2	0	0	0	1	1	1	1	0	0	0	2	5	5	3	6	3	8	5	7	11	8	4	5	9	14	8	20	9	0.676856
CHDH	55349	675	728	816.5	60.5	124	480.8	15	10	15	9	17	15	22	17	19	26	31	44	49	37	52	57	62	89	91	87	120	124	168	161	155	187	237	204	0.961382
RALBP1	10928	686	303	406.5	521.5	493.5	482.1	0	0	0	2	0	1	1	0	1	2	0	4	1	5	3	7	9	8	13	11	11	15	14	28	19	24	11	24	0.868908
ELP1	8518	583	200	353.5	614.5	664.5	483.1	5	5	2	7	6	6	11	8	15	15	14	26	22	35	22	27	25	26	20	22	27	21	29	32	26	33	26	17	0.188052
ADAM8	101	107	661	132.5	732	784.5	483.4	5	4	2	5	2	4	5	7	5	3	4	6	6	11	7	13	14	13	16	22	23	23	21	22	19	25	27	28	0.948759
IL18R1	8809	175	375	52	952.5	869.5	484.8	0	0	0	0	0	0	1	0	0	1	0	0	0	0	0	0	1	0	2	1	1	1	2	1	3	2	1	0	0.590574
MS4A1	931	266	739	816.5	273	334.5	485.8	2	7	8	11	16	8	10	8	21	29	48	71	64	82	75	82	77	71	102	88	101	88	92	107	88	112	92	91	0.770496
COL9A1	1297	420	193	816.5	479	531	487.9	28	35	33	38	45	39	52	42	43	55	94	63	52	52	67	67	77	93	82	102	124	125	141	136	170	180	198	244	0.908597
CUL3	8452	263	239	571	952.5	414	487.9	0	0	0	0	0	0	0	0	0	1	0	0	1	4	4	7	4	7	7	7	9	7	17	16	11	15	12	18	0.914537
EPHB6	2051	479	501	282.5	567	614.5	488.8	44	56	61	49	48	62	48	38	54	53	50	46	43	58	54	65	56	72	68	72	80	68	91	87	100	91	90	76	0.889827
PLXNA2	5362	249	605	816.5	366.5	414	490.2	29	37	28	40	41	46	59	35	53	40	43	48	60	73	83	114	126	126	190	231	254	312	360	389	369	423	455	537	0.979841
CYP3A5	1577	223	406	816.5	479	531	491.1	0	0	0	0	1	2	5	1	0	2	2	6	5	15	21	24	21	35	27	17	23	31	27	30	34	36	33	37	0.865639
COL3A1	1281	192	25	557	812	869.5	491.1	4	2	1	2	2	2	2	3	1	1	2	4	3	1	2	0	0	3	6	4	3	4	2	5	4	14	7	7	0.619808
KRT19	3880	539	388	816.5	366.5	350	492	6	2	3	7	11	17	18	21	11	18	25	14	13	17	20	27	27	26	27	17	27	29	30	37	28	34	46	37	0.809048
DEFB1	1672	491	745	132.5	521.5	571	492.2	0	0	0	0	0	1	1	4	8	5	6	9	8	12	10	6	11	8	14	18	14	6	12	10	11	8	16	9	0.295219
RPS19	6223	336	513	548	614.5	459.5	494.2	37	23	33	39	43	45	42	32	45	32	41	30	40	59	39	63	60	66	58	47	57	57	71	65	66	68	63	36	0.477482
CAST	831	435	169	816.5	521.5	531	494.6	13	15	15	18	21	20	16	22	26	29	34	17	24	25	20	29	32	24	35	17	20	21	31	27	26	15	16	15	-0.378177
EFNA1	1942	613	252	223.5	668	719.5	495.2	0	0	2	2	3	5	2	2	2	2	2	1	1	1	4	4	2	5	1	1	3	4	4	8	4	1	0	4	0.251384
SULT2A1	6822	659	454	816.5	251	297.5	495.6	23	45	47	46	51	77	67	94	114	115	84	77	95	100	86	89	68	98	94	98	87	89	84	101	83	121	92	101	0.403957
ATP2A2	488	413	116	567	812	571	495.8	10	16	7	10	15	28	24	15	26	31	32	34	33	39	35	37	57	46	48	67	57	78	68	80	95	80	92	91	0.951134
ABCC6	368	404	405	372.5	521.5	784.5	497.5	40	38	34	22	24	21	36	26	26	31	37	37	38	39	57	50	34	43	39	43	39	56	42	66	47	62	49	59	0.610369
TXN2	25828	375	281	99.5	952.5	784.5	498.5	0	0	0	0	1	1	0	0	0	1	3	0	2	4	2	1	4	6	6	5	3	9	3	4	2	10	1	8	0.447797
BEST1	7439	834	737	816.5	31	75.5	498.8	4	4	8	3	4	14	4	8	12	9	25	14	24	22	49	74	70	71	69	105	62	96	67	75	65	57	81	60	0.618511
GLS2	27165	965	623	816.5	27.5	62.5	498.9	15	26	18	32	33	51	53	48	36	30	30	40	53	49	21	51	35	40	35	41	34	20	18	17	9	19	13	28	-0.688092
ADD1	118	481	295	816.5	443	459.5	499	1	0	1	0	1	4	3	5	5	5	15	5	8	10	11	7	10	9	10	9	8	4	4	9	5	2	4	4	-0.678748
ALAD	210	547	503	57.5	668	719.5	499	19	12	8	10	15	14	10	8	16	11	13	20	10	20	19	12	14	16	15	12	11	14	12	4	9	10	8	8	-0.686292
CYP11B1	1584	568	803	190.5	443	493.5	499.6	0	4	6	6	10	8	6	5	6	5	3	4	2	3	3	6	3	8	5	6	7	6	6	6	7	11	7	7	0.767157
FMR1	2332	454	417	580	521.5	531	500.7	2	2	4	8	18	22	38	20	29	41	34	23	30	28	33	43	29	32	47	50	51	73	83	70	94	76	85	58	0.860032
ATP8A2	51761	873	807	489.5	135.5	200	501	6	7	4	8	3	2	7	5	7	7	5	8	7	3	4	7	4	2	7	3	6	3	3	5	4	12	3	7	0.0418217
PDE4D	5144	469	192	458.5	668	719.5	501.4	0	0	0	0	0	0	1	1	1	1	3	1	5	4	0	14	13	7	8	11	7	9	12	11	11	8	18	14	0.712781
ACAD8	27034	868	586	816.5	87	150.5	501.6	3	5	5	4	2	17	12	23	24	21	26	31	32	44	52	52	65	69	148	96	118	120	127	148	205	158	183	247	0.942426
ARNTL	406	625	656	473	366.5	387.5	501.6	9	10	14	18	12	16	20	17	21	25	39	35	29	41	42	55	60	58	63	55	73	81	80	81	96	122	122	128	0.950776
LIPG	9388	624	368	425	521.5	571	501.9	3	4	3	4	5	5	2	4	6	5	5	9	8	20	19	19	12	21	11	20	19	25	22	25	19	7	19	21	0.4742
RNASE1	6035	787	206	816.5	614.5	88.5	502.5	23	26	21	23	31	41	40	33	43	38	39	38	48	28	26	26	36	31	36	27	20	27	19	18	28	9	18	12	-0.809224
NOCT	25819	862	679	267	341	365	502.8	3	1	3	1	3	5	5	8	10	7	8	20	14	17	24	20	20	17	27	27	20	27	21	22	24	24	18	26	0.569382
OPA1	4976	584	338	500.5	521.5	571	503	3	1	3	4	2	4	2	2	1	5	4	8	11	19	11	8	25	21	16	27	22	20	21	21	21	23	17	35	0.726238
ALAS2	212	485	310	333.5	668	719.5	503.2	0	0	1	1	1	1	0	0	2	2	3	3	4	3	5	5	5	7	10	7	6	10	10	6	9	13	4	12	0.718926
CD53	963	393	365	282.5	812	664.5	503.4	2	1	1	7	4	3	3	5	1	0	1	1	2	2	1	0	1	3	0	0	1	0	0	2	2	0	1	1	-0.169988
ADCYAP1R1	117	314	324	363	732	784.5	503.5	0	0	0	3	1	4	2	9	6	5	11	9	10	10	9	5	9	10	5	5	10	10	5	17	9	9	9	6	-0.0603424
HLA-DRB5	3127	339	686	816.5	311.5	365	503.6	8	9	23	32	30	48	49	60	43	61	52	54	73	53	75	64	61	81	68	75	80	77	81	91	69	74	98	76	0.711831
CYP17A1	1586	203	601	816.5	443	459.5	504.6	3	4	12	7	9	10	13	19	19	19	19	20	22	23	30	24	24	21	30	23	25	33	28	30	22	31	22	26	0.43782
AGO2	27161	642	585	510	215.5	571	504.7	39	25	31	41	57	44	37	58	50	65	53	46	56	63	81	105	95	125	100	107	109	119	135	137	153	141	152	168	0.959365
PLCD1	5333	546	404	393.5	614.5	571	505.8	0	0	5	3	4	7	8	9	8	8	2	2	6	4	3	6	3	3	9	5	5	0	4	1	1	1	0	1	-0.432076
PRKCH	5583	447	270	296	732	784.5	505.9	1	1	3	4	5	1	2	1	4	3	2	0	2	4	0	0	1	4	2	4	2	1	4	0	2	1	2	4	0.19292
CCL24	6369	227	617	9	812	869.5	506.9	0	0	0	0	0	0	0	1	2	2	3	2	4	9	2	6	2	8	1	1	5	2	3	5	3	4	4	7	0.0683297
LPIN1	23175	566	419	458.5	521.5	571	507.2	0	0	0	0	0	0	0	0	3	0	1	0	3	1	3	2	5	6	14	10	10	18	23	14	14	19	14	15	0.863767
PITX1	5307	484	724	458.5	411	459.5	507.4	2	2	1	0	0	3	6	4	4	8	10	4	13	5	5	5	4	10	10	4	10	12	7	5	13	10	11	12	0.384888
MYOCD	93649	410	767	223.5	567	571	507.7	0	0	0	0	0	0	0	0	0	0	0	2	3	6	11	16	9	17	20	17	21	20	20	29	21	29	21	27	0.918185
TPH1	7166	704	373	282.5	567	614.5	508.2	0	1	0	0	1	0	3	1	3	0	2	3	6	3	11	17	15	24	13	25	20	18	34	35	15	20	26	20	0.739202
HCFC1	3054	337	366	307	812	719.5	508.3	2	1	0	3	2	7	4	9	3	5	11	10	8	10	8	9	6	10	6	7	9	4	9	12	6	6	9	6	-0.376052
CEBPZ	10153	887	438	157	567	493.5	508.5	20	10	17	15	16	25	41	24	30	47	44	34	31	26	40	47	33	36	32	20	27	34	24	28	30	45	34	35	-0.174346
IRAK3	11213	483	185	383	732	784.5	513.5	0	0	0	0	0	0	0	0	0	1	0	0	2	1	2	2	3	6	1	6	5	5	7	10	6	11	4	10	0.831665
EPHX2	2053	460	640	190.5	614.5	664.5	513.9	0	0	2	2	4	6	2	4	2	1	6	5	5	4	2	6	4	11	5	6	7	6	5	7	8	12	7	15	0.622874
ACPP	55	495	719	816.5	126.5	414	514.2	97	103	97	98	79	83	85	96	119	85	105	99	100	117	117	118	97	101	101	98	107	112	128	172	149	136	130	155	0.698683
P2RY12	64805	287	431	527	668	664.5	515.5	0	0	0	0	0	0	0	0	0	2	0	5	2	17	13	20	25	15	28	30	44	49	40	60	70	58	84	44	0.914709
SCNN1A	6337	527	298	816.5	443	493.5	515.6	0	0	0	0	0	0	2	1	1	2	1	8	4	6	5	1	8	3	4	6	1	2	2	5	2	2	0	0	-0.506807
PFN1	5216	121	168	816.5	812	664.5	516.4	0	1	0	3	1	1	0	2	5	1	2	2	2	1	0	3	4	6	4	5	6	5	16	22	22	24	15	22	0.867193
PLA2G6	8398	652	446	548	443	493.5	516.5	1	5	2	5	2	5	12	17	16	18	4	7	7	10	10	14	7	16	15	18	11	16	16	22	8	13	13	19	0.626466
LRP5	4041	663	391	223.5	521.5	784.5	516.7	2	0	1	1	3	3	4	4	3	4	8	14	16	16	22	31	24	29	28	27	30	35	43	30	47	38	40	41	0.91188
ECE1	1889	60	323	816.5	668	719.5	517.4	1	0	0	1	2	4	4	12	22	18	28	14	22	14	8	10	17	16	11	13	10	4	13	12	13	6	13	6	-0.607143
MC4R	4160	648	443	446	521.5	531	517.9	0	0	0	0	1	0	2	2	8	14	11	16	15	43	42	44	53	49	39	40	43	42	57	45	48	51	41	47	0.658394
RNASE2	6036	750	699	138.5	479	531	519.5	4	7	3	6	5	7	6	7	9	7	3	12	3	10	6	5	6	5	9	11	12	2	2	14	6	9	4	10	0.126907
NPR1	4881	578	131	372.5	732	784.5	519.6	2	1	5	1	5	6	0	5	7	7	7	13	11	10	8	6	10	8	17	19	16	8	7	11	10	18	10	9	0.179715
SLC11A1	6556	328	526	214.5	812	719.5	520	3	3	2	2	12	15	16	19	26	26	36	28	37	27	29	20	35	25	26	28	13	23	16	24	18	23	20	29	-0.56973
AICDA	57379	763	542	496.5	388.5	414	520.8	0	0	0	0	0	1	1	1	1	1	4	1	2	17	17	17	13	23	23	20	24	35	23	32	18	28	12	14	0.565569
ASCC1	51008	803	764	816.5	87	134	520.9	6	9	26	26	22	30	31	37	30	34	27	33	31	38	45	32	43	39	36	44	36	31	32	39	27	39	24	21	-0.29754
GP1BA	2811	214	191	816.5	668	719.5	521.8	6	5	10	7	9	11	15	17	11	14	25	15	22	23	29	16	20	18	19	16	22	8	7	7	8	3	4	14	-0.772921
PPT1	5538	320	353	565.5	388.5	983.5	522.1	2	8	3	14	4	8	6	10	8	8	14	13	11	14	15	17	23	18	18	14	17	10	24	19	19	26	18	18	0.523991
FDXR	2232	647	911	816.5	87	150.5	522.4	12	7	3	6	2	5	3	5	3	6	5	5	5	4	3	5	2	6	4	2	7	3	2	2	4	7	0	7	-0.106694
MPL	4352	245	268	425	812	869.5	523.9	4	10	3	10	13	32	34	33	37	30	29	19	22	12	19	17	22	21	33	38	52	42	43	30	43	52	55	41	0.800419
SRY	6736	774	488	267	521.5	571	524.3	9	10	30	35	31	43	23	33	31	28	24	32	28	27	24	32	25	27	30	33	32	40	50	40	49	42	35	46	0.789145
FOXC1	2296	618	720	479	311.5	493.5	524.4	39	38	34	22	23	21	35	26	26	31	33	37	35	54	55	41	39	41	37	46	35	51	55	66	48	72	80	75	0.753877
PDCD1LG2	80380	674	836	20	521.5	571	524.5	0	0	0	0	0	0	0	0	0	0	0	1	1	8	3	5	7	5	5	5	15	9	6	9	9	16	16	21	0.841057
DDAH2	23564	576	600	52	732	664.5	524.9	0	0	1	1	0	0	0	1	0	1	2	1	0	3	1	6	7	15	8	13	14	11	18	31	16	7	19	12	0.72273
GSTM2	2946	111	574	489.5	732	719.5	525.2	0	1	1	10	12	22	23	22	25	33	41	35	32	42	49	48	48	42	47	67	65	70	89	92	65	56	58	39	0.560761
COL4A1	1282	226	59	816.5	812	719.5	526.6	0	0	0	1	0	0	0	1	0	0	0	0	0	0	0	2	2	7	1	5	7	5	10	7	7	8	10	7	0.880717
KCNQ1	3784	345	265	573	732	719.5	526.9	1	0	0	0	1	2	5	11	12	19	27	29	31	36	36	30	42	45	48	46	49	55	53	49	48	58	37	49	0.770365
SLC22A3	6581	896	460	816.5	204	259	527.1	7	10	15	10	10	14	18	12	18	7	12	14	9	20	17	12	21	22	35	40	63	107	134	163	196	237	354	433	0.862686
CHRNA7	1139	290	363	246	952.5	784.5	527.2	0	0	0	0	0	0	0	0	1	1	1	1	1	2	0	2	0	1	0	2	2	4	2	6	5	9	7	9	0.819785
TNFRSF11A	8792	229	427	46.5	952.5	983.5	527.7	0	4	1	0	3	2	6	2	1	2	4	7	7	5	7	6	9	12	12	13	12	20	18	28	24	26	35	36	0.936361
TNNI3	7137	667	930	816.5	87	142	528.5	2	7	4	5	12	17	21	42	50	54	57	58	57	55	63	60	46	53	63	70	66	57	61	84	65	86	74	87	0.729051
TFDP1	7027	733	522	458.5	443	493.5	530	0	1	1	2	1	0	2	2	2	1	1	1	1	3	5	4	0	6	3	4	5	0	3	4	3	7	11	4	0.531823
GHRL	51738	169	564	577	732	614.5	531.3	6	3	1	8	10	18	12	19	28	24	21	34	15	19	28	18	26	12	17	22	21	18	13	6	13	14	15	11	-0.634859
SLC8A1	6546	540	250	415.5	732	719.5	531.4	1	1	0	1	0	3	2	5	7	6	5	6	10	4	4	2	6	10	6	8	10	20	17	20	20	17	29	24	0.865053
PTPRF	5792	338	278	816.5	614.5	614.5	532.3	7	7	11	7	3	11	8	13	17	12	19	22	9	11	16	23	12	16	18	21	14	25	18	17	10	24	26	19	0.298141
IL17RB	55540	627	549	307	567	614.5	532.9	0	0	0	0	0	0	0	0	0	0	1	0	0	0	0	0	0	0	2	1	1	5	4	4	6	2	2	8	0.754156
ALOX15	246	388	873	401.5	479	531	534.5	2	2	0	1	2	0	1	0	2	4	3	3	2	5	7	12	9	9	17	14	11	5	25	18	20	20	18	27	0.856009
FEV	54738	595	706	282.5	521.5	571	535.2	5	10	18	11	19	16	19	13	16	15	15	12	10	19	18	25	23	33	29	37	33	38	36	36	50	45	37	56	0.934474
C1QL1	10882	504	937	816.5	177.5	243	535.6	35	29	39	49	31	40	30	50	40	43	37	46	63	79	82	77	78	88	69	91	74	107	106	105	124	97	100	106	0.849017
DRD1	1812	400	474	527	614.5	664.5	536	17	18	22	23	18	22	28	17	27	21	25	17	15	19	20	14	28	31	26	20	31	36	25	33	41	32	34	36	0.781517
MC2R	4158	623	371	816.5	411	459.5	536.2	0	0	0	6	5	10	12	11	13	3	12	5	10	3	10	6	9	10	10	7	14	16	8	11	7	5	5	5	-0.115958
ITGB4	3691	47	140	816.5	812	869.5	537	0	0	0	0	1	1	0	1	2	0	2	0	2	2	1	1	0	4	4	1	1	1	0	3	1	4	5	0	0.207577
CCRL2	9034	748	683	157	567	531	537.2	1	0	0	1	2	1	0	3	4	11	8	9	12	9	10	15	12	14	10	13	19	15	11	18	17	33	25	28	0.803414
ARSB	411	423	380	496.5	668	719.5	537.4	4	6	8	2	4	4	5	3	3	3	6	3	3	5	7	6	7	9	14	12	13	10	16	18	13	17	10	15	0.835732
CTNNBL1	56259	878	678	254	443	436	537.8	12	20	17	8	9	14	11	15	12	14	22	17	21	26	31	23	27	40	33	37	30	41	37	42	58	68	64	56	0.900214
SH2B2	10603	636	409	333.5	443	869.5	538.2	8	13	4	6	10	7	8	9	10	17	26	15	13	20	26	22	18	30	18	16	22	25	19	47	44	29	21	30	0.485356
ETV6	2120	499	383	425	668	719.5	538.9	7	4	5	10	6	17	31	41	29	50	44	55	37	34	38	37	40	40	34	20	37	35	44	27	41	32	34	31	-0.461823
RAG1	5896	451	593	515	567	571	539.4	2	5	12	12	13	14	22	18	14	19	8	18	13	23	13	12	13	12	16	25	14	19	16	17	20	23	15	15	0.346413
KDM1A	23028	632	650	515	443	459.5	539.9	0	0	0	0	0	0	1	1	1	4	0	3	1	0	1	4	1	9	5	8	9	15	18	32	21	41	61	70	0.848127
OXT	5020	321	769	213	614.5	784.5	540.4	1	2	3	2	0	0	0	1	0	1	0	2	0	1	0	0	1	0	1	4	6	3	10	6	7	4	5	7	0.778714
INPPL1	3636	402	389	296	952.5	664.5	540.8	0	0	0	0	0	0	0	0	2	4	3	8	4	9	4	10	5	16	8	11	11	7	7	9	10	7	9	13	0.430051
ERAP1	51752	278	287	207	952.5	983.5	541.6	0	0	0	0	0	0	0	0	0	0	1	0	8	0	2	2	7	2	6	6	7	17	13	22	13	22	17	15	0.847435
SI	6476	863	864	816.5	55	111	541.9	50	38	37	45	39	33	48	38	37	43	43	57	47	50	37	56	55	67	85	88	68	127	122	115	127	136	135	110	0.907184
MLC1	23209	480	535	816.5	443	436	542.1	7	3	5	9	7	3	8	8	16	11	15	22	23	22	29	21	29	29	38	23	24	35	50	32	37	44	52	37	0.7955
ENTPD1	953	188	697	816.5	479	531	542.3	0	2	2	1	3	1	3	4	8	10	18	8	12	9	6	15	6	19	13	22	17	25	18	35	35	43	27	41	0.825357
SMARCB1	6598	592	266	436.5	812	614.5	544.2	1	1	1	0	0	4	1	0	3	12	12	7	13	6	15	18	14	14	16	25	14	20	20	18	26	27	32	33	0.868583
CDK11B	984	779	962	816.5	64.5	101.5	544.7	3	9	17	19	13	22	21	25	26	31	20	17	24	28	15	20	14	23	20	20	19	20	18	27	29	23	19	19	0.163367
NUCB2	4925	607	597	816.5	341	365	545.3	3	1	0	2	1	0	2	0	3	3	3	2	4	2	3	3	6	6	10	3	6	9	14	9	11	12	17	17	0.885671
HMBS	3145	505	680	816.5	341	387.5	546	40	45	25	34	38	35	35	40	35	36	33	43	54	49	50	36	56	44	68	60	70	59	47	87	79	82	79	89	0.841981
PAH	5053	453	341	816.5	732	387.5	546	27	44	39	35	48	28	30	32	33	25	27	28	16	35	26	20	21	21	28	24	28	35	32	37	34	24	30	37	0.498204
UMOD	7369	362	705	816.5	388.5	459.5	546.3	27	28	33	34	41	35	57	52	46	44	74	64	66	82	74	67	64	84	84	96	119	113	127	150	139	165	165	188	0.932571
SLC6A2	6530	669	231	816.5	521.5	493.5	546.3	1	1	1	8	7	8	8	13	26	17	21	26	30	28	26	33	39	19	36	28	21	29	31	31	21	32	17	26	-0.112721
PAEP	5047	735	696	816.5	215.5	269.5	546.5	27	26	30	30	36	23	25	30	39	55	46	39	38	52	56	67	76	65	81	84	84	99	103	115	119	127	162	167	0.961643
CYP11B2	1585	525	837	816.5	251	317	549.3	3	8	12	8	3	12	9	10	13	9	11	19	20	15	26	19	20	17	15	19	26	18	27	25	21	23	11	26	0.341479
SPINK1	6690	446	848	816.5	288.5	350	549.8	59	57	33	31	35	35	23	32	17	20	23	34	34	45	32	39	48	42	56	52	74	62	74	78	83	102	83	94	0.9533
RAPGEF5	9771	840	872	816.5	80	142	550.1	7	10	13	6	9	6	7	8	14	13	14	7	9	12	23	25	27	39	55	47	53	61	65	56	71	61	52	59	0.909029
SLC25A37	51312	879	868	816.5	69	124	551.3	2	3	0	3	1	1	6	1	3	8	6	8	7	7	10	12	5	31	18	33	40	43	60	62	72	61	71	101	0.941616
LTB4R	1241	729	374	138.5	732	784.5	551.6	0	5	1	5	0	2	1	2	4	1	3	2	3	8	8	8	9	6	9	7	23	11	20	13	16	26	19	21	0.8521
GATA5	140628	439	714	223.5	668	719.5	552.8	0	0	0	0	0	0	0	0	0	1	1	1	1	1	1	0	1	1	2	3	1	5	5	5	8	4	6	2	0.726445
PPP2CA	5515	387	174	816.5	952.5	436	553.2	0	0	0	0	0	0	0	1	0	2	2	1	1	1	0	1	1	2	1	1	0	1	3	3	5	6	11	2	0.604631
BCS1L	617	746	610	816.5	230.5	365	553.6	10	15	13	15	13	12	11	2	9	12	15	5	19	15	26	27	26	31	49	27	30	25	42	56	43	43	53	42	0.835262
MUC2	4583	890	497	816.5	251	317	554.3	1	4	6	5	15	10	18	16	26	23	25	15	29	30	30	32	16	24	25	18	24	30	34	29	21	18	24	24	-0.0549565
EXT1	2131	776	471	515	479	531	554.4	4	1	0	0	0	4	2	8	21	58	51	35	19	13	19	17	15	17	14	21	24	14	16	25	23	19	16	9	-0.471892
MBTPS1	8720	662	288	393.5	567	869.5	556	0	0	0	0	1	0	1	0	0	0	0	1	3	3	7	7	8	15	16	7	12	21	17	13	21	18	33	22	0.891839
H2AFX	3014	461	421	816.5	668	414	556.1	0	2	0	1	2	2	1	0	1	0	1	2	4	14	17	17	33	25	28	38	15	28	21	19	21	31	25	12	0.504201
NOTCH4	4855	620	376	506	614.5	664.5	556.2	0	0	0	0	0	1	2	4	2	1	6	5	3	7	14	6	3	5	3	3	7	8	8	16	6	11	11	8	0.411321
UCN3	114131	644	752	210.5	567	614.5	557.6	7	20	14	11	29	23	31	21	33	24	25	18	32	25	32	19	29	39	27	28	34	31	43	33	34	35	30	46	0.646497
WISP3	8838	736	1006	77	251	719.5	557.9	16	8	16	16	12	19	8	8	18	9	10	10	10	8	14	16	23	21	12	18	14	15	26	21	11	20	27	22	0.653277
XDH	7498	378	226	506	812	869.5	558.3	9	17	18	16	21	15	18	13	9	12	12	12	8	10	11	8	5	6	13	11	8	10	15	9	12	11	16	12	0.349363
DLAT	1737	829	304	816.5	411	436	559.3	8	9	5	6	9	8	7	4	8	14	7	2	9	5	6	14	10	12	8	6	12	14	9	12	9	23	22	9	0.612319
RRAD	6236	668	489	816.5	388.5	436	559.6	29	25	40	46	57	63	91	91	106	108	137	151	154	140	144	156	165	173	176	208	203	259	233	257	272	241	279	269	0.947967
MS4A2	2206	357	612	13.5	952.5	869.5	560.9	1	1	0	0	1	0	1	2	2	1	2	0	3	3	2	1	8	6	13	25	21	18	32	20	45	39	34	28	0.897005
PNMA2	10687	987	1020	2.5	388.5	414	562.4	1	2	1	2	1	1	1	3	2	1	2	2	1	0	3	1	5	2	4	5	5	6	3	8	7	13	8	12	0.852046
PARD3	56288	706	396	816.5	443	459.5	564.2	0	1	0	0	0	2	1	1	4	2	4	6	9	12	11	15	22	18	16	13	20	10	23	30	18	24	28	26	0.824867
TRAM1	23471	908	369	157	668	719.5	564.3	2	11	12	15	28	25	25	40	33	34	40	42	36	42	43	36	41	45	47	47	52	39	47	42	49	47	63	34	0.416969
SCD	6319	544	561	816.5	443	459.5	564.8	8	10	22	16	26	22	31	34	25	33	37	42	32	46	46	52	52	65	62	74	70	91	90	139	108	90	116	118	0.919303
CXADR	1525	556	557	816.5	614.5	280	564.8	0	0	0	0	0	0	0	1	1	4	6	6	8	15	9	7	7	7	6	3	2	9	8	8	5	8	7	8	-0.144543
CD48	962	280	746	282.5	732	784.5	565	10	19	11	28	18	12	13	8	13	9	4	4	3	5	4	10	8	4	7	3	4	6	6	5	9	3	7	4	0.145916
CCHCR1	54535	849	800	816.5	155.5	207	565.6	0	5	5	1	2	4	2	8	6	14	13	9	6	5	12	10	9	11	11	14	14	12	19	13	22	29	24	30	0.831095
CISH	1154	696	346	816.5	479	493.5	566.2	4	4	2	4	4	7	6	9	15	43	53	64	73	98	115	111	133	112	142	130	141	141	163	179	169	190	167	199	0.96019
CEACAM3	1084	770	991	816.5	98.5	159.5	567.1	92	87	65	71	69	69	49	45	46	59	59	54	46	38	56	34	45	64	62	42	70	46	60	73	81	90	85	71	0.692618
ATP1A1	476	358	445	415.5	952.5	664.5	567.1	0	0	0	0	0	0	0	0	0	0	0	1	1	0	0	0	0	1	1	1	2	2	2	2	0	5	1	3	0.623097
COL9A3	1299	559	615	816.5	411	436	567.5	29	35	35	41	49	42	53	49	47	55	101	66	61	58	72	75	90	100	91	104	131	128	144	145	179	185	201	252	0.907933
NSMAF	8439	781	587	24.5	732	719.5	568.8	3	7	15	8	7	12	16	15	19	20	18	22	20	18	29	34	28	28	27	24	41	26	34	48	49	50	53	48	0.876467
UGCG	7357	755	999	816.5	109	167.5	569.4	3	3	2	0	0	5	8	4	15	10	14	11	9	9	15	16	14	7	7	9	20	19	27	17	15	18	26	15	0.555711
SMS	6611	643	608	816.5	366.5	414	569.6	51	44	34	23	25	27	17	17	22	22	25	24	25	18	34	41	26	28	47	56	38	65	86	79	91	107	102	118	0.931311
ARR3	407	717	676	223.5	952.5	280	569.8	0	1	1	8	8	2	5	2	5	2	6	2	17	8	10	10	6	9	7	7	7	15	5	9	12	14	12	14	0.401024
AP1S2	8905	467	950	816.5	288.5	334.5	571.3	1	1	0	1	4	1	1	0	3	1	6	2	0	4	4	2	2	3	11	5	4	6	3	12	10	4	14	14	0.669076
PDAP1	11333	893	722	123	251	869.5	571.7	44	44	45	45	44	48	55	64	84	68	74	73	80	88	91	95	67	76	79	82	86	92	109	141	122	103	104	135	0.748152
CD200	4345	526	646	816.5	411	459.5	571.8	25	25	45	30	20	22	22	28	36	36	31	28	43	39	43	43	42	47	53	53	54	41	83	63	57	65	85	75	0.861172
CYSLTR2	57105	730	701	41	668	719.5	571.9	0	0	0	0	0	0	0	0	0	0	1	3	0	3	2	3	3	4	2	4	2	9	2	4	3	6	1	4	0.369831
TLR10	81793	317	795	13.5	952.5	784.5	572.5	0	0	0	0	0	0	0	0	0	0	0	0	0	1	1	2	3	2	2	1	3	2	4	6	5	8	8	6	0.89847
FLOT2	2319	630	889	543	388.5	414	572.9	1	3	2	3	5	8	5	1	10	7	5	7	8	6	7	2	4	9	17	19	12	20	29	32	36	33	15	23	0.797431
NECTIN1	5818	220	629	425	812	784.5	574.1	2	0	0	0	1	1	0	2	4	7	9	12	12	10	9	17	14	19	13	11	8	12	19	15	12	20	19	21	0.602671
APLNR	187	769	788	138.5	567	614.5	575.4	0	0	0	0	0	0	1	0	3	2	7	1	2	10	3	5	4	10	7	12	14	6	18	22	23	29	26	37	0.879068
FAM126A	84668	984	995	816.5	26	57.5	575.8	10	11	9	11	11	9	10	8	17	18	25	19	20	27	28	40	40	62	55	60	85	83	102	133	180	195	204	266	0.920842
NPY2R	4887	753	507	527	521.5	571	575.9	0	4	5	3	5	7	10	12	10	15	9	12	17	12	14	18	15	15	14	13	25	16	20	19	15	12	8	14	0.118065
PPARGC1B	133522	680	647	157	732	664.5	576.1	0	0	0	0	0	0	0	0	2	1	0	1	2	4	2	5	8	7	2	9	5	6	9	7	4	17	7	8	0.673462
GRK2	156	474	122	816.5	812	664.5	577.8	0	0	0	1	1	2	8	5	11	14	15	14	15	13	14	22	21	12	16	17	25	23	24	33	21	23	38	21	0.706815
PPIB	5479	471	213	816.5	732	664.5	579.4	0	3	2	0	6	3	3	1	2	5	4	4	5	2	3	4	1	4	4	6	11	11	8	2	5	5	6	13	0.512388
BAG6	7917	775	253	564	812	493.5	579.5	0	0	0	0	1	0	0	1	0	1	0	0	0	0	1	3	1	0	4	1	4	3	8	7	16	6	7	2	0.66771
NISCH	11188	812	694	425	479	493.5	580.7	0	0	1	2	1	4	3	7	1	3	9	0	3	13	8	11	9	3	7	7	9	6	9	15	2	7	4	18	0.234944
ADORA2B	136	760	318	446	668	719.5	582.3	0	0	0	0	0	0	0	0	0	0	0	0	0	0	0	0	0	1	2	0	1	0	5	5	2	4	3	3	0.749832
PTGDR	5729	789	635	307	567	614.5	582.5	0	0	1	0	0	2	1	3	3	3	1	1	1	2	5	6	3	11	6	5	6	6	6	4	3	5	7	6	0.493812
GUCY1A1	2982	520	176	282.5	952.5	983.5	582.9	0	0	0	0	0	0	0	0	0	0	0	0	0	0	1	0	0	0	0	0	0	0	0	0	1	0	2	0	0.321526
SCN8A	6334	510	588	816.5	479	531	584.9	30	35	35	39	46	41	54	44	46	58	96	67	54	56	75	74	84	100	87	109	133	127	156	145	178	206	222	257	0.914514
SLC12A3	6559	427	453	816.5	567	664.5	585.6	7	6	2	5	11	18	22	30	29	27	29	33	43	42	43	51	51	47	62	58	62	73	76	91	88	82	103	108	0.968998
RYR2	6262	421	334	578	812	784.5	585.9	0	1	3	5	6	6	15	7	10	10	16	22	24	18	38	31	25	36	33	38	42	35	30	53	50	60	51	47	0.865777
TRPV1	7442	778	709	515	479	459.5	588.1	1	1	1	2	4	0	1	2	3	6	13	31	35	52	96	100	98	117	153	128	129	154	152	183	189	174	192	190	0.961517
EPHA4	2043	401	470	554	732	784.5	588.3	1	1	0	0	1	5	8	7	12	5	9	8	14	10	8	11	10	19	17	13	10	12	17	15	22	15	18	27	0.731483
BMPR1B	658	127	559	436.5	952.5	869.5	588.9	0	0	0	0	0	0	0	0	1	0	2	2	0	4	0	2	1	1	0	3	3	2	6	4	2	6	5	3	0.572665
HSPA14	51182	922	698	816.5	230.5	280	589.4	6	4	9	13	9	6	14	12	10	13	11	10	10	16	15	19	10	18	16	13	23	14	21	24	20	25	23	21	0.787598
F2RL2	2151	747	416	816.5	479	493.5	590.4	0	0	0	0	0	2	1	1	4	1	3	4	8	11	5	10	16	18	10	11	14	6	12	23	13	10	16	16	0.594477
ACACA	31	507	1041	816.5	311.5	280	591.2	24	12	8	15	12	13	11	19	25	40	41	41	53	52	47	58	75	48	88	78	57	52	55	56	181	137	154	194	0.753511
TERF1	7013	615	441	560.5	732	614.5	592.6	0	0	0	1	0	0	2	8	6	11	9	23	19	20	27	23	29	29	32	32	26	18	25	31	40	33	38	34	0.744221
NDUFA2	4695	463	875	816.5	732	82	593.7	11	15	29	51	45	60	61	65	76	75	96	99	100	112	82	118	101	99	87	83	89	94	101	126	114	131	119	108	0.43709
NOL3	8996	569	861	383	812	350	595	5	4	8	4	7	5	0	3	5	9	6	8	6	12	18	20	17	21	24	26	18	25	21	22	33	26	23	21	0.790313
AGR2	10551	470	820	406.5	668	614.5	595.8	7	3	1	2	1	1	3	6	3	3	3	7	15	9	9	19	18	19	18	21	31	42	41	46	55	61	93	56	0.908976
ATRNL1	26033	847	569	816.5	366.5	387.5	597.3	5	6	1	3	3	3	11	5	5	5	9	5	10	9	10	6	9	6	2	11	11	7	10	9	13	18	17	9	0.514028
HUNK	30811	916	638	157	614.5	664.5	598	77	64	74	104	110	127	111	83	107	110	109	87	113	79	108	93	116	101	82	97	99	90	85	91	84	77	85	68	-0.612057
STAM2	10254	782	209	816.5	614.5	571	598.6	1	3	2	5	4	2	3	7	4	8	4	13	6	4	8	6	6	5	8	2	9	6	6	10	12	6	9	13	0.361127
GCA	25801	791	595	816.5	388.5	414	601	3	3	5	7	5	9	3	6	8	9	11	12	4	14	13	10	9	13	19	17	13	15	22	16	17	15	30	26	0.755426
TAB1	10454	593	232	515	952.5	719.5	602.4	0	0	0	0	0	0	0	0	1	0	0	1	1	1	0	3	2	1	2	0	0	0	1	1	3	0	3	4	0.376097
HTN3	3347	969	969	816.5	98.5	159.5	602.5	4	13	6	6	12	14	8	7	6	7	6	9	5	15	10	5	11	7	7	4	5	7	6	1	29	21	7	10	0.245287
SMOX	54498	723	691	816.5	288.5	493.5	602.5	43	26	33	22	21	22	15	17	13	16	17	18	19	29	27	30	31	18	30	37	45	36	41	69	60	61	70	61	0.908861
LTC4S	4056	380	936	393.5	732	571	602.5	3	1	5	3	7	12	5	8	5	3	9	5	9	12	5	5	6	8	5	4	4	7	4	4	5	3	3	0	-0.725561
SPG7	6687	784	539	816.5	614.5	259	602.6	0	0	0	0	1	0	0	2	1	1	1	1	0	1	4	2	4	2	6	5	2	2	4	6	6	11	7	7	0.792035
CNOT6	57472	963	851	446	366.5	387.5	602.8	1	0	1	0	2	1	0	2	4	4	1	11	7	9	15	10	16	10	13	14	9	14	6	14	14	12	13	20	0.544882
MFN2	9927	641	624	816.5	443	493.5	603.6	1	3	1	2	6	2	7	1	2	6	2	2	2	8	5	9	9	19	13	17	20	25	38	34	29	36	47	39	0.95549
S1PR3	1903	716	639	157	732	784.5	605.7	0	0	0	0	0	0	0	1	1	5	4	4	3	3	3	1	4	6	3	0	5	4	6	6	6	5	5	7	0.546988
PSAT1	29968	529	673	816.5	952.5	62.5	606.7	1	1	0	0	3	1	5	2	1	2	2	0	1	3	3	4	3	3	4	0	1	3	9	2	2	4	6	5	0.467091
CYP21A2	1589	477	871	816.5	411	459.5	607	16	14	19	11	14	20	8	21	22	19	14	15	13	17	5	14	17	15	17	21	19	16	18	17	18	16	18	21	0.559908
MOS	4342	658	787	816.5	366.5	414	608.4	22	38	31	25	22	39	27	30	26	21	22	23	23	17	28	22	19	26	21	37	38	43	90	178	335	473	558	667	0.790516
COL9A2	1298	554	662	816.5	479	531	608.5	28	35	33	39	45	39	53	42	44	55	95	62	53	51	67	67	77	92	83	101	127	126	141	138	175	178	198	243	0.90999
NR6A1	2649	191	492	425	952.5	983.5	608.8	0	0	0	0	1	1	1	6	7	5	2	5	3	7	8	2	5	1	2	6	1	1	3	7	9	4	6	3	0.105886
CYSLTR1	10800	538	598	816.5	521.5	571	609	1	0	1	0	0	0	0	4	3	2	2	7	7	5	9	8	13	13	8	10	7	8	8	8	10	4	12	16	0.452368
TUSC2	11334	874	799	138.5	251	983.5	609.2	44	45	45	45	45	49	56	64	86	68	74	75	80	90	94	95	68	80	81	83	86	94	110	145	127	106	105	138	0.748952
LRPAP1	4043	512	626	816.5	521.5	571	609.4	24	33	38	25	47	33	42	47	46	46	61	50	60	77	67	70	78	94	83	78	86	77	107	97	81	117	87	101	0.806194
PCLAF	9768	701	665	816.5	411	459.5	610.6	112	175	133	87	99	80	106	74	35	53	50	42	27	40	28	38	38	33	38	34	32	24	31	52	34	38	27	26	-0.329227
HSPB3	8988	801	993	816.5	146	297.5	610.8	17	23	23	52	62	83	89	97	98	145	141	113	173	143	150	157	129	152	146	144	128	169	161	216	194	218	196	209	0.75094
IFNL1	282618	826	1016	483.5	341	387.5	610.8	0	0	0	0	0	0	0	0	0	0	0	0	0	1	1	4	3	5	5	4	13	9	9	5	6	9	10	8	0.820248
DHX40	79665	944	766	816.5	230.5	297.5	610.9	30	28	28	37	37	34	43	45	53	39	49	41	34	50	64	61	72	79	74	90	99	119	133	129	133	162	159	188	0.971232
PDLIM3	27295	590	894	816.5	366.5	387.5	610.9	5	6	1	3	3	3	11	5	5	5	9	5	10	9	10	6	9	7	2	11	12	7	10	9	13	17	17	9	0.514088
INHA	3623	385	548	446	812	869.5	612.1	10	7	7	4	4	10	6	4	13	8	11	11	9	10	8	10	12	13	6	12	13	8	10	10	15	28	12	15	0.45907
ADRA2C	152	137	671	321.5	952.5	983.5	613.1	0	1	0	0	0	1	0	1	0	3	0	1	2	3	1	4	3	3	1	1	2	0	0	0	3	0	2	0	-0.271715
AAAS	8086	905	637	816.5	98.5	614.5	614.3	28	20	15	9	7	5	15	12	16	32	41	54	61	54	70	53	76	66	67	94	64	75	104	81	73	83	82	87	0.753618
PCDH1	5097	861	144	254	952.5	869.5	616.2	0	0	0	0	0	0	0	0	0	0	0	0	0	0	0	0	0	0	1	1	0	0	3	1	4	2	2	0	0.589296
RHD	6007	707	469	816.5	521.5	571	617	7	8	10	9	19	14	23	31	24	13	26	15	17	19	21	38	31	22	30	28	29	27	49	57	51	42	47	54	0.832862
ARSD	414	920	822	816.5	230.5	297.5	617.3	7	0	4	8	2	3	4	4	5	3	4	12	13	9	9	7	17	17	25	28	36	48	60	92	106	145	161	193	0.886567
PTGDR2	11251	664	841	406.5	567	614.5	618.6	0	0	0	0	0	0	0	0	0	1	1	2	1	4	3	10	5	5	7	11	17	19	14	14	18	7	14	7	0.692704
C7	730	185	162	816.5	952.5	983.5	619.9	2	1	2	0	2	3	2	0	1	1	0	1	1	2	2	2	2	2	1	1	0	0	1	0	0	0	1	0	-0.503043
PLCE1	51196	552	345	816.5	668	719.5	620.2	0	0	0	0	0	0	0	0	0	0	0	0	0	0	0	0	1	1	1	3	4	4	9	16	19	7	8	11	0.78958
LILRB2	10288	535	472	816.5	614.5	664.5	620.5	0	0	0	0	0	0	0	0	1	0	1	0	1	2	1	0	0	1	6	5	8	5	11	22	20	30	30	28	0.885042
PAFAH1B1	5048	486	631	816.5	567	614.5	623	49	30	54	43	55	42	50	47	71	58	60	68	36	67	52	61	52	81	75	75	95	90	138	119	102	118	100	148	0.855035
MINK1	50488	850	434	816.5	521.5	493.5	623.1	43	44	51	56	60	39	39	42	53	45	42	48	36	46	34	42	37	38	40	50	36	40	43	55	58	48	68	77	0.663545
LY86	9450	523	618	157	952.5	869.5	624	0	0	1	0	0	1	0	0	3	1	2	2	3	3	5	5	2	6	3	0	3	4	3	1	3	3	7	3	0.129656
GYPC	2995	567	913	816.5	388.5	436	624.2	3	6	10	5	4	7	8	11	11	9	10	9	14	10	12	13	11	9	8	17	14	19	18	21	21	20	23	32	0.842423
TBPL1	9519	788	730	446	288.5	869.5	624.4	58	42	67	83	98	91	107	90	112	88	125	114	118	121	123	122	137	187	143	136	140	213	147	179	197	170	171	183	0.763298
PDCL	5082	824	499	282.5	732	784.5	624.4	1	0	0	1	0	0	2	2	3	4	6	5	5	4	8	10	9	7	12	8	11	11	7	7	4	5	7	4	-0.0344798
PDLIM5	10611	579	332	816.5	732	664.5	624.8	4	9	13	9	32	38	34	45	57	64	55	60	58	68	60	49	55	68	80	59	70	41	70	77	95	71	69	65	0.443016
COL4A5	1287	376	199	816.5	952.5	784.5	625.7	7	6	17	11	12	16	18	10	7	17	20	14	9	17	14	23	19	15	12	15	13	20	38	36	39	39	29	31	0.727076
HLA-DPA1	3113	395	659	254	952.5	869.5	626	25	9	20	15	9	10	7	6	6	4	6	10	3	5	7	7	6	2	4	6	7	13	16	8	17	10	11	9	0.552332
SH2B3	10019	604	381	816.5	668	664.5	626.8	0	0	0	0	0	1	0	1	0	0	4	1	4	3	4	3	4	3	5	4	13	13	11	10	7	12	15	9	0.79255
HLA-E	3133	492	525	436.5	812	869.5	627	2	0	6	1	1	1	2	3	13	13	14	7	9	12	10	11	10	14	8	15	13	17	20	25	20	15	24	22	0.796229
MYH14	79784	653	370	816.5	952.5	350	628.4	0	0	0	0	0	0	0	0	0	0	2	1	2	0	3	1	0	0	1	0	1	1	2	1	0	1	1	3	-4.06341e-17
ABCC9	10060	575	451	190.5	952.5	983.5	630.5	0	0	0	0	0	0	0	1	3	1	2	1	3	1	6	2	4	2	1	2	4	6	4	0	5	4	1	1	0.0508767
SULT1A1	6817	751	715	816.5	411	459.5	630.6	10	5	6	3	8	11	9	9	12	11	16	11	11	15	26	28	16	23	16	35	23	24	25	19	24	19	22	28	0.476317
FLNC	2318	428	514	816.5	732	664.5	631	1	0	0	2	0	1	3	4	2	5	12	6	3	6	4	4	3	5	4	5	6	7	5	8	12	5	14	14	0.472426
TGM1	7051	577	581	816.5	567	614.5	631.2	4	6	6	6	6	7	5	6	10	13	9	10	2	11	7	14	7	10	4	17	10	16	22	25	27	45	28	33	0.818629
TNFRSF10C	8794	497	658	816.5	614.5	571	631.4	1	3	2	1	0	4	3	0	3	6	4	2	7	5	13	9	4	7	11	3	7	10	1	9	11	14	8	12	0.447639
ATP2B1	490	478	415	534	952.5	784.5	632.8	0	0	0	2	1	1	1	0	0	0	3	0	0	0	1	0	1	2	2	0	2	2	2	5	2	1	2	4	0.523782
REM1	28954	961	771	157	614.5	664.5	633.6	57	43	52	52	48	57	53	62	56	52	66	76	76	53	72	72	65	78	100	105	108	117	123	144	123	130	128	171	0.916624
MT-CYB	4519	692	869	91	732	784.5	633.7	68	77	74	84	110	115	87	88	102	110	103	112	82	92	96	103	79	75	80	66	61	72	101	92	97	93	102	69	-0.248291
QPCT	25797	761	867	816.5	341	387.5	634.6	0	1	3	4	4	4	2	5	3	1	0	1	3	5	5	6	8	3	9	4	4	14	11	16	11	10	8	11	0.756609
ALOX5AP	241	301	725	816.5	668	664.5	635	0	0	0	0	0	0	0	0	0	0	0	0	0	0	0	1	2	4	3	2	6	4	6	1	7	6	5	3	0.760588
SLC27A5	10998	705	824	816.5	215.5	614.5	635.1	27	19	22	20	13	18	32	35	25	24	23	26	27	31	31	21	31	31	32	19	28	27	13	26	22	22	17	16	-0.5327
IKZF3	22806	506	672	483.5	732	784.5	635.6	0	0	1	1	1	1	2	1	2	4	2	4	4	5	4	2	3	13	10	8	5	13	9	19	15	14	15	10	0.784563
ATOX1	475	598	849	282.5	732	719.5	636.2	0	0	0	0	0	1	0	1	2	6	4	3	2	5	2	4	2	3	8	5	3	7	6	12	7	5	9	8	0.683118
TNFRSF9	3604	503	814	816.5	521.5	531	637.2	0	0	1	2	3	5	3	6	12	11	13	15	25	24	22	20	17	29	27	22	28	33	34	43	32	29	22	27	0.630582
GRASP	160622	864	779	157	668	719.5	637.5	3	7	15	13	23	13	16	16	22	25	30	24	29	30	24	18	33	34	49	49	59	50	62	67	65	70	74	77	0.940784
MSRA	4482	806	452	254	812	869.5	638.7	0	0	0	1	0	1	1	0	0	1	2	3	3	6	7	4	9	13	6	15	17	14	14	17	7	21	8	10	0.648857
DIO2	1734	344	759	816.5	614.5	664.5	639.7	15	19	13	18	8	11	12	11	12	9	21	25	15	18	25	32	20	27	64	83	88	58	71	68	66	48	24	28	0.473299
CRB1	23418	777	455	372.5	812	784.5	640.2	0	1	0	0	0	0	0	0	0	1	0	3	1	2	3	1	3	4	2	2	0	1	2	6	7	4	8	6	0.659743
ASRGL1	80150	903	823	816.5	273	387.5	640.6	24	21	26	30	21	23	35	37	53	49	49	57	65	78	57	81	86	80	70	89	119	107	106	146	161	167	157	154	0.934034
NAA16	79612	1020	980	106	567	531	640.8	1	1	1	3	5	9	11	9	10	5	11	6	8	7	7	8	18	14	17	19	13	11	24	7	20	13	15	9	0.399059
MYCBP2	23077	605	333	816.5	668	784.5	641.4	13	19	11	16	13	12	12	6	10	14	11	18	16	22	28	21	36	28	39	29	45	40	41	49	49	64	75	74	0.942312
TPM1	7168	368	203	816.5	952.5	869.5	641.9	6	6	6	5	8	9	5	7	5	8	5	8	10	12	9	9	5	5	3	7	7	4	3	9	3	4	4	6	-0.520885
NAT10	55226	876	844	816.5	341	334.5	642.4	5	6	1	3	3	3	11	5	5	5	9	5	10	9	10	6	9	7	2	11	11	7	10	9	17	18	19	12	0.606783
FTO	79068	762	670	816.5	479	493.5	644.2	1	0	0	0	0	1	0	0	0	1	0	0	0	0	0	1	0	10	52	50	77	87	82	88	100	93	100	68	0.908394
LRG1	116844	745	508	372.5	812	784.5	644.4	0	1	1	0	1	0	0	1	0	0	0	4	0	1	4	2	2	2	3	1	5	2	2	2	3	10	9	6	0.630856
HDLBP	3069	765	412	816.5	614.5	614.5	644.5	2	3	6	9	7	2	9	9	7	9	6	17	5	9	12	6	5	7	10	5	14	11	8	9	17	9	11	16	0.344375
FBLN2	2199	697	325	816.5	668	719.5	645.2	0	0	0	1	1	2	6	3	2	4	1	5	1	0	2	0	1	2	1	0	2	1	4	2	8	3	1	3	0.314609
TRIM13	10206	798	741	425	952.5	317	646.7	0	1	0	0	0	0	0	0	0	0	0	0	1	1	0	0	1	1	1	0	0	3	1	2	3	0	1	1	0.411749
CAPG	822	594	729	406.5	521.5	983.5	646.9	11	20	12	24	30	32	46	54	53	75	62	71	85	79	65	82	95	87	104	116	114	88	126	107	105	123	99	85	0.674984
GUSB	2990	513	732	816.5	567	614.5	648.6	28	40	21	22	19	34	23	27	27	21	22	26	20	18	15	12	13	18	18	6	8	4	5	2	7	5	1	2	-0.91008
DSP	1832	293	604	816.5	812	719.5	649	12	13	14	11	13	17	17	14	14	21	14	20	17	15	17	16	20	21	13	15	14	28	35	17	19	28	30	24	0.573902
MAPRE2	10982	677	570	406.5	812	784.5	650	2	4	1	3	6	3	2	4	6	9	11	11	16	22	10	26	16	6	15	23	12	18	29	23	23	20	20	16	0.408981
DAP3	7818	530	339	816.5	952.5	614.5	650.5	0	0	0	0	0	0	0	1	0	0	1	3	2	0	5	0	3	1	0	3	1	0	1	1	2	3	0	0	-0.255868
TMPRSS11D	9407	740	687	816.5	479	531	650.7	3	8	3	8	11	8	9	8	15	13	15	16	15	17	21	23	42	37	33	34	38	39	56	36	54	36	40	56	0.846551
ALPP	250	907	890	816.5	311.5	334.5	651.9	11	10	4	6	10	5	17	6	5	9	13	9	11	12	14	11	12	12	6	13	18	9	11	17	20	24	21	12	0.542418
SLC25A20	788	739	653	816.5	521.5	531	652.2	7	6	4	8	11	10	6	12	11	3	8	5	10	3	4	8	10	11	7	17	13	16	23	29	17	24	22	16	0.810133
HOMER2	9455	363	565	816.5	732	784.5	652.2	4	14	17	23	22	18	11	14	20	5	11	15	11	23	13	18	13	23	25	9	11	27	23	23	23	29	38	23	0.657402
CYP4A11	1579	204	305	816.5	952.5	983.5	652.3	1	0	3	3	2	0	3	0	2	1	2	0	2	1	2	4	4	1	9	6	1	4	1	4	4	2	3	3	0.227537
OSR1	130497	865	753	439.5	341	869.5	653.6	19	25	22	44	37	45	40	11	8	19	22	29	29	26	41	52	37	50	36	44	41	52	73	66	69	68	61	87	0.896053
SIGLEC8	27181	997	931	63	614.5	664.5	654	0	0	0	0	0	0	0	0	0	0	1	0	1	1	0	1	0	0	1	2	0	1	3	2	0	1	3	4	0.564476
AQP5	362	635	733	816.5	521.5	571	655.4	0	0	0	0	0	0	2	3	3	7	8	8	11	5	5	12	16	16	23	19	9	22	24	35	24	33	31	26	0.862113
DAPK3	1613	679	710	557	668	664.5	655.7	0	4	3	6	12	5	5	6	13	25	18	17	24	24	33	35	32	29	68	60	55	62	82	83	96	85	69	95	0.933598
CABIN1	23523	754	657	816.5	521.5	531	656	6	3	3	3	7	13	11	6	14	11	17	26	35	36	29	52	39	52	47	53	56	62	45	52	50	48	49	70	0.782633
HLA-DQB2	3120	726	920	353.5	668	614.5	656.4	3	7	14	12	20	20	14	8	15	13	7	18	17	6	13	10	14	21	11	12	8	21	22	25	21	23	18	27	0.660928
LCN1	3933	831	907	816.5	341	387.5	656.6	16	14	5	15	15	24	12	14	22	19	18	22	15	18	19	23	16	26	24	18	25	20	33	42	35	25	26	39	0.715758
MZB1	51237	964	1041	190.5	521.5	571	657.6	4	13	21	25	46	50	93	68	117	54	89	54	65	40	52	31	91	53	62	41	62	54	55	59	66	48	53	38	-0.271006
HTR2B	3357	588	461	307	952.5	983.5	658.4	0	0	0	0	4	3	11	6	7	6	8	4	4	10	6	6	7	3	8	8	10	8	12	8	7	16	14	8	0.59084
SLC9A3R2	9351	645	511	816.5	668	664.5	661	0	0	0	1	1	1	0	3	4	1	4	7	6	2	6	10	9	4	7	8	12	10	12	17	9	17	3	10	0.525488
KYNU	8942	255	418	816.5	952.5	869.5	662.3	0	3	0	0	1	2	6	2	4	1	0	1	3	2	2	1	0	2	0	3	1	2	0	1	2	0	4	0	3.16539e-17
GSTO2	119391	350	721	307	952.5	983.5	662.8	0	0	0	0	1	0	1	1	1	2	1	2	0	0	0	0	0	0	0	1	2	2	1	2	0	0	3	1	0.318754
HAVCR1	26762	811	985	816.5	341	365	663.7	1	4	2	4	3	5	12	19	24	18	17	11	26	27	27	42	38	67	61	64	65	94	103	106	134	136	170	152	0.96841
CYP4F2	8529	394	433	557	952.5	983.5	664	0	0	0	0	0	0	0	0	4	0	3	0	1	0	0	1	1	1	6	9	6	8	14	9	11	6	7	4	0.689323
FNDC5	252995	858	918	816.5	341	387.5	664.2	0	0	0	0	0	0	0	0	0	0	0	0	0	0	0	0	0	0	0	0	0	0	8	35	93	110	122	115	0.778514
PBK	55872	734	634	816.5	567	571	664.5	0	1	0	2	1	1	1	1	0	2	6	3	4	1	3	5	2	7	2	4	6	3	6	9	5	21	28	26	0.699228
MARK2	2011	744	579	816.5	614.5	571	665	3	5	7	1	3	4	3	9	14	21	24	30	25	35	39	27	35	39	38	32	38	41	55	47	42	40	45	35	0.683084
RECQL4	9401	589	1041	515	567	614.5	665.3	2	1	2	1	1	2	8	4	5	5	2	5	5	10	10	15	19	14	12	29	25	31	32	17	24	37	25	23	0.816864
TMED7-TICAM2	100302736	974	914	372.5	952.5	116	665.8	0	0	0	0	0	0	0	0	0	0	0	0	0	0	0	0	0	0	0	0	0	0	0	0	0	0	0	0	#VALUE!
ATP1A2	477	370	509	515	952.5	983.5	666	0	0	0	0	0	0	1	1	0	0	0	0	0	2	4	4	6	2	8	1	3	2	2	6	5	2	2	3	0.294318
ADCY5	111	429	263	816.5	952.5	869.5	666.1	0	0	1	1	0	0	4	3	4	0	1	6	3	2	1	0	6	3	3	7	5	10	8	5	8	14	5	7	0.653497
GNPTAB	79158	867	560	816.5	521.5	571	667.2	42	22	28	49	49	58	61	51	61	67	68	63	58	65	66	90	127	102	150	170	178	193	223	256	297	293	248	260	0.957171
SCNN1G	6340	698	553	816.5	614.5	664.5	669.3	0	0	0	0	0	1	0	0	1	0	1	3	1	2	2	1	1	3	0	1	4	1	1	0	1	1	1	1	-0.29223
CLN3	1201	459	602	572	732	983.5	669.7	3	1	1	7	5	14	4	21	13	24	10	22	14	16	27	22	12	11	19	12	8	13	9	18	23	13	16	17	-0.0931198
PLIN1	5346	608	648	816.5	614.5	664.5	670.3	66	67	63	75	77	82	71	107	104	118	101	141	106	129	171	175	198	207	230	244	283	348	416	440	450	530	532	596	0.970028
CBFB	865	710	179	534	952.5	983.5	671.8	0	0	0	0	0	4	10	0	4	1	3	4	4	3	4	4	3	7	1	6	8	2	2	4	4	6	1	6	0.0894749
AP3B1	8546	532	575	816.5	567	869.5	672	1	1	0	2	0	1	4	6	5	5	8	3	6	10	12	6	4	5	7	3	7	13	18	23	25	10	15	13	0.605088
SYMPK	8189	315	780	816.5	732	719.5	672.6	2	5	4	3	2	2	5	7	5	3	8	4	8	7	7	7	4	3	8	9	10	6	10	10	5	10	5	15	0.41203
SEPT4	5414	756	558	543	732	784.5	674.7	20	13	16	34	25	23	35	34	42	40	42	54	49	54	59	64	82	77	81	88	89	116	110	132	135	124	135	143	0.977474
LTB4R2	56413	832	893	372.5	614.5	664.5	675.3	0	0	0	0	0	0	0	0	0	0	0	0	0	0	1	0	0	1	5	2	5	2	4	5	2	1	6	6	0.745966
IKZF4	64375	897	755	393.5	668	664.5	675.6	3	1	2	1	1	2	1	0	0	2	0	0	1	1	4	1	4	6	5	7	11	9	12	17	19	20	21	22	0.963251
ATP5F1A	498	581	414	816.5	952.5	614.5	675.7	8	2	7	4	8	5	1	3	4	3	2	3	5	4	3	4	1	4	5	5	4	2	9	12	11	5	12	7	0.677454
ASAP1	50807	758	571	816.5	251	983.5	676	44	44	45	45	44	48	55	64	84	68	75	74	81	89	92	101	69	77	82	84	87	93	111	144	127	107	107	135	0.751515
HBD	3045	708	763	816.5	521.5	571	676	0	6	6	2	1	5	5	5	2	3	3	3	5	10	8	11	9	9	11	17	14	7	14	11	18	13	12	8	0.61515
CEACAM6	4680	603	926	171	812	869.5	676.3	11	12	6	11	8	10	4	3	5	4	4	4	6	5	10	6	8	11	10	7	10	13	8	17	14	19	16	15	0.872141
CLCA1	1179	764	463	333.5	952.5	869.5	676.5	0	1	0	1	2	0	1	1	0	4	3	4	3	1	3	3	1	3	1	5	2	0	1	4	2	10	4	2	0.188613
HPD	3242	640	641	816.5	311.5	983.5	678.5	20	11	21	20	13	28	15	13	23	9	14	13	11	7	12	13	23	16	11	18	10	18	21	18	11	18	21	27	0.579998
NELFCD	51497	899	702	816.5	952.5	29.5	679.9	0	0	0	0	0	0	0	0	0	0	0	0	0	0	0	0	0	0	0	0	0	0	0	0	0	0	0	0	#VALUE!
ZNF469	84627	983	939	816.5	311.5	365	683	8	7	6	9	8	5	8	1	2	3	6	0	6	5	19	17	11	17	22	20	19	16	28	34	34	30	35	34	0.925732
OXSR1	9943	883	563	372.5	812	784.5	683	0	0	0	0	0	0	0	0	0	0	0	0	2	0	1	2	2	1	2	2	0	4	5	3	6	5	7	4	0.820578
CHIT1	1118	655	493	333.5	952.5	983.5	683.5	0	0	1	0	0	0	0	0	3	0	2	3	1	1	0	2	0	4	2	3	2	2	4	11	8	3	10	3	0.600626
CREB3L1	90993	537	882	496.5	732	784.5	686.4	2	3	3	2	3	2	6	9	17	31	22	16	32	21	24	23	15	23	24	29	33	35	27	24	35	53	34	33	0.653881
LTA4H	4048	303	727	468	952.5	983.5	686.8	2	2	6	0	2	2	2	0	0	2	4	1	1	1	0	0	0	1	1	1	6	2	4	2	5	4	5	9	0.65883
DNAH5	1767	880	464	816.5	614.5	664.5	687.9	4	3	6	5	2	7	4	4	7	10	12	2	7	7	8	5	11	9	6	8	11	6	8	8	14	19	15	16	0.638476
TREH	11181	967	382	816.5	614.5	664.5	688.9	8	11	9	17	11	24	19	19	18	8	11	14	11	9	6	13	13	14	18	12	15	15	17	12	15	16	17	9	0.401858
GLYAT	10249	807	544	816.5	614.5	664.5	689.3	6	2	7	14	23	11	19	17	21	26	12	16	17	29	28	23	30	39	44	44	43	47	64	48	44	63	52	58	0.921184
INSIG2	51141	724	711	333.5	812	869.5	690	0	0	0	0	0	0	0	0	0	0	0	0	1	1	0	4	2	6	15	14	12	6	1	3	6	3	8	7	0.419185
CPD	1362	703	546	816.5	668	719.5	690.6	3	1	4	6	4	10	4	11	19	11	9	16	11	18	12	17	14	23	24	7	12	26	24	22	24	27	38	23	0.700194
OTC	5009	626	466	425	952.5	983.5	690.6	34	33	20	31	26	45	47	34	34	38	37	33	25	35	34	26	31	32	25	48	31	23	39	37	42	44	21	34	0.142232
YY1AP1	55249	929	932	816.5	366.5	414	691.6	1	3	1	3	8	7	4	13	12	8	13	12	6	10	12	14	13	16	25	20	32	50	53	93	145	222	257	325	0.816697
HPS1	3257	727	655	816.5	479	784.5	692.4	1	1	0	2	0	1	4	6	5	5	7	3	5	10	11	6	3	5	7	2	7	13	18	22	25	9	15	13	0.615023
TNFRSF13B	23495	282	682	816.5	812	869.5	692.4	1	1	1	5	5	5	1	7	1	2	14	10	3	3	5	14	8	20	7	12	11	18	20	26	17	18	18	15	0.638897
MMAB	326625	937	700	816.5	479	531	692.7	10	5	13	8	14	16	11	18	13	31	30	41	34	47	72	92	108	110	101	128	110	142	121	171	144	180	170	193	0.965229
SLC12A2	6558	562	791	530	812	784.5	695.9	1	6	5	2	1	4	6	9	4	6	5	7	13	5	6	9	13	19	11	13	14	19	17	18	20	27	14	26	0.829434
SCN10A	6336	823	758	816.5	521.5	571	698	4	3	3	3	3	2	2	7	5	9	13	13	7	17	13	11	14	13	18	30	24	28	32	43	44	61	72	104	0.850286
GNB3	2784	602	748	458.5	812	869.5	698	0	0	0	0	0	0	0	0	0	1	2	1	3	3	4	4	4	12	8	6	4	11	6	6	5	4	6	8	0.481809
IL31	386653	714	1024	816.5	443	493.5	698.2	0	0	0	0	0	0	0	0	0	0	0	0	0	0	2	1	5	6	4	4	7	9	16	12	13	18	18	25	0.935521
SLC6A7	6534	999	742	816.5	443	493.5	698.8	2	2	2	3	4	2	4	4	6	8	7	11	6	12	9	5	4	6	5	7	4	8	3	5	12	3	7	4	-0.352686
GRK4	2868	822	628	307	952.5	784.5	698.8	1	1	0	1	2	0	1	1	2	1	1	0	0	1	1	0	3	2	1	2	1	0	2	2	1	4	4	1	0.52124
TRPA1	8989	845	743	458.5	732	719.5	699.6	2	1	0	0	2	0	1	1	1	1	1	0	0	1	3	5	8	15	31	48	36	46	51	55	54	54	84	90	0.955701
NANS	54187	821	925	816.5	443	493.5	699.8	9	1	7	5	6	9	8	11	7	16	10	15	16	16	20	21	16	16	26	34	27	39	33	30	35	28	24	36	0.804966
PGRMC1	10857	752	336	816.5	812	784.5	700.2	0	1	0	2	3	2	2	1	3	3	7	3	2	7	10	5	7	5	16	11	19	14	22	23	16	16	30	23	0.865598
IFNL3	282617	930	955	816.5	388.5	414	700.8	0	0	0	0	0	0	0	0	0	0	0	0	0	0	0	0	0	0	0	6	33	144	171	145	136	106	60	43	0.683586
RHCE	6006	695	902	816.5	521.5	571	701.2	2	2	1	0	3	1	7	3	5	7	4	6	7	3	5	5	6	1	4	11	9	10	6	13	6	18	7	9	0.560113
PQBP1	10084	860	740	816.5	521.5	571	701.8	0	0	0	1	1	0	2	0	2	1	3	1	2	4	4	3	7	7	2	7	11	10	6	13	10	12	5	7	0.689003
PRH2	5555	722	978	816.5	11	983.5	702.2	105	113	143	136	184	216	214	196	210	200	176	187	193	195	216	219	236	230	204	195	198	210	203	197	197	186	158	148	-0.373105
IL9R	3581	496	964	123	952.5	983.5	703.8	0	0	1	0	1	1	3	2	3	1	3	0	0	1	2	0	1	0	0	3	0	0	2	0	1	2	0	0	-0.155528
TRPC5	7224	828	789	506	732	664.5	703.9	0	0	0	0	1	1	3	1	0	1	4	2	1	3	3	9	5	6	6	6	7	11	10	4	7	7	6	14	0.670609
ADCY2	108	516	251	816.5	952.5	983.5	703.9	0	0	0	0	1	2	5	2	1	1	1	3	1	0	1	1	3	1	0	0	0	2	7	3	2	2	0	1	0.134328
ADAM33	80332	738	435	816.5	812	719.5	704.2	0	0	0	0	0	0	0	0	0	0	0	0	4	7	15	7	8	8	4	10	4	7	7	13	17	6	8	9	0.469205
CCR8	1237	515	975	353.5	812	869.5	705	0	0	0	0	0	0	0	2	6	2	3	4	1	5	4	3	7	10	2	1	3	4	5	5	3	5	2	3	-0.0356049
NEDD4L	23327	629	347	816.5	952.5	784.5	705.9	0	0	0	0	0	1	2	1	0	2	1	5	3	6	14	11	10	11	13	14	12	10	9	17	14	11	12	10	0.62455
HRH4	59340	910	713	393.5	732	784.5	706.6	0	0	0	0	0	0	0	0	0	0	0	2	2	3	7	6	9	9	16	25	25	22	16	18	15	20	17	19	0.8091
NANOS3	342977	940	1023	816.5	366.5	387.5	706.7	0	0	1	0	0	0	1	1	1	6	7	5	6	6	13	11	11	15	13	12	15	15	16	21	21	20	20	12	0.835109
PARP9	83666	946	892	401.5	311.5	983.5	706.9	27	18	22	17	10	18	31	29	21	20	17	19	20	24	22	15	26	28	23	15	19	17	10	18	14	16	16	11	-0.521156
RAD50	10111	571	330	816.5	952.5	869.5	707.9	2	0	0	2	1	2	3	2	0	2	3	6	3	5	7	4	4	6	4	11	2	7	5	2	8	6	6	5	0.192055
CRHR2	1395	549	660	816.5	732	784.5	708.4	0	0	0	0	0	1	0	5	2	1	3	2	2	2	5	7	7	7	5	3	7	4	6	12	9	4	7	6	0.554708
NAAA	27163	802	645	816.5	614.5	664.5	708.5	0	0	1	1	3	1	0	1	1	2	1	2	1	12	8	1	1	4	1	2	4	8	7	5	4	3	7	6	0.258367
HSD3B1	3283	712	834	816.5	567	614.5	708.8	0	2	0	0	0	1	1	0	0	0	1	0	1	0	1	0	1	1	1	1	1	1	3	2	1	3	4	6	0.757233
ARG2	384	718	630	816.5	668	719.5	710.4	0	0	0	2	1	1	1	3	5	5	2	5	4	2	3	5	6	3	7	1	10	13	11	11	13	4	14	14	0.751482
SPINK5	11005	457	772	816.5	732	784.5	712.4	0	0	0	0	0	0	0	0	0	1	1	2	6	6	9	14	2	4	4	4	4	7	10	1	4	3	3	6	-0.0590167
CASZ1	54897	882	976	190.5	732	784.5	713	6	1	3	6	2	5	4	5	2	2	4	7	6	4	7	3	6	10	3	6	13	11	16	14	18	16	17	22	0.870288
ATG7	10533	691	827	452	812	784.5	713.3	0	0	0	0	0	0	0	0	0	0	0	0	0	0	0	0	1	1	0	1	2	5	3	9	4	10	21	14	0.79439
BMP10	27302	528	960	562.5	732	784.5	713.4	0	0	0	0	0	0	0	0	0	1	0	0	0	0	3	0	1	2	1	1	1	3	3	4	3	1	5	1	0.626366
HOXD13	3239	619	734	477.5	952.5	784.5	713.5	3	5	4	9	5	5	7	6	8	8	7	8	22	20	23	16	27	31	24	29	34	51	50	72	73	74	74	79	0.94877
SLC7A1	6541	830	592	816.5	668	664.5	714.2	4	1	1	2	2	0	3	4	9	7	17	22	15	16	21	14	13	19	6	21	27	16	16	20	20	25	16	17	0.165657
ST8SIA4	7903	683	801	816.5	614.5	664.5	715.9	7	5	3	2	3	4	5	5	10	5	9	3	6	6	8	6	6	7	7	9	10	7	9	8	2	8	10	12	0.396971
GSTT2	2953	231	1018	816.5	732	784.5	716.4	0	0	0	0	0	0	0	1	1	0	0	0	0	0	0	0	0	1	0	1	0	1	0	0	2	0	0	1	0.38949
REEP5	7905	901	821	816.5	521.5	531	718.2	2	1	2	0	1	3	2	1	1	1	0	2	0	1	7	7	5	18	9	12	7	9	8	6	4	4	8	8	0.372601
KCNE1	3753	895	828	816.5	521.5	531	718.4	39	44	52	59	67	46	46	48	57	39	40	50	32	42	33	43	42	50	40	47	42	44	54	55	65	54	68	73	0.79392
KIF3A	11127	681	649	816.5	732	719.5	719.6	0	1	0	0	2	0	1	1	1	3	1	0	0	1	1	2	1	1	1	1	4	3	8	9	4	6	9	7	0.83896
SLC38A1	81539	958	946	816.5	443	436	719.9	1	1	1	3	5	9	11	9	10	5	13	8	8	10	9	9	18	17	18	20	16	15	25	8	25	14	20	13	0.505554
CHRM2	1129	450	397	816.5	952.5	983.5	719.9	0	0	0	0	1	2	1	2	2	2	0	0	2	1	3	2	4	3	2	2	1	4	1	1	5	0	2	1	0.129121
GSTM5	2949	131	718	816.5	952.5	983.5	720.3	0	0	0	0	0	0	0	0	0	0	0	0	0	0	0	0	0	0	0	1	0	0	0	0	0	0	1	0	0.272587
FCER1A	2205	531	577	816.5	812	869.5	721.2	1	0	1	2	2	4	3	7	6	6	6	14	6	6	2	2	2	5	8	7	4	1	2	2	2	1	1	2	-0.623063
NOX5	79400	553	956	425	952.5	719.5	721.2	0	0	0	0	0	0	0	0	0	0	0	1	0	1	1	1	1	6	6	2	6	6	10	4	9	11	11	7	0.863616
SCNN1B	6338	514	342	816.5	952.5	983.5	721.7	0	0	0	0	0	1	0	0	0	1	0	1	2	0	0	0	2	1	3	3	2	1	1	0	0	0	2	1	0.0574083
CHRNA3	1136	656	467	557	952.5	983.5	723.2	0	0	0	0	0	0	0	0	2	0	1	1	0	0	0	0	0	0	0	4	7	15	16	9	10	6	10	1	0.619341
SNRPB	6628	835	895	816.5	614.5	459.5	724.1	3	1	1	0	0	0	1	0	1	5	1	3	1	0	0	0	0	0	2	1	4	2	1	2	4	3	2	2	0.485793
MAEA	10296	805	668	468	812	869.5	724.5	0	0	4	3	0	3	3	1	7	2	6	3	3	4	3	6	7	6	4	9	12	3	8	12	11	12	10	15	0.78946
ENPP3	5169	700	979	816.5	521.5	614.5	726.3	17	15	16	7	14	16	26	20	11	26	9	20	16	15	17	22	24	21	36	30	40	38	41	42	46	40	39	55	0.9386
FLVCR1	28982	848	865	816.5	126.5	983.5	727.9	31	17	30	25	29	28	24	19	31	25	19	21	10	17	38	22	34	45	46	66	77	61	63	108	99	108	78	105	0.9288
MDH1	4190	560	530	816.5	952.5	784.5	728.7	0	0	0	1	0	2	4	4	2	2	0	2	2	2	2	4	2	0	1	1	0	3	2	2	2	3	4	2	0.316772
ZFPM1	161882	794	521	816.5	732	784.5	729.6	7	5	7	9	8	11	5	10	13	13	19	21	19	21	23	30	19	30	27	28	35	32	51	41	49	36	39	62	0.858314
ACAA1	30	651	361	816.5	952.5	869.5	730.1	29	34	31	26	25	21	32	30	41	32	38	30	40	47	40	54	38	39	298	293	424	445	447	174	174	170	105	100	0.450789
PRPS1	5631	796	523	816.5	732	784.5	730.4	19	11	15	31	22	17	20	16	18	28	28	31	28	33	36	38	57	48	54	61	72	78	74	103	89	88	91	108	0.965759
ASPN	54829	702	751	816.5	668	719.5	731.4	2	1	0	4	2	1	0	0	1	2	4	2	3	1	0	4	8	7	6	4	3	5	2	5	7	8	8	11	0.652447
FDPS	2224	591	654	816.5	812	784.5	731.6	8	11	10	10	18	18	22	12	9	13	16	16	16	20	17	12	21	18	14	15	24	20	26	27	36	35	16	31	0.67241
ARID3B	10620	819	941	307	812	784.5	732.7	0	0	0	0	2	0	2	2	2	4	11	1	5	4	4	4	8	2	2	2	3	3	3	5	7	8	4	2	-0.117104
VIT	5212	790	879	816.5	567	614.5	733.4	1	0	2	0	1	1	4	4	2	4	0	2	1	3	1	1	3	2	3	3	5	3	3	5	8	6	7	6	0.86977
CHST3	9469	720	903	816.5	614.5	614.5	733.7	4	9	4	14	12	18	11	15	19	15	15	15	14	22	19	18	36	29	43	51	42	50	58	52	50	66	44	73	0.919154
CNTN3	5067	994	923	816.5	443	493.5	734	3	3	6	10	6	6	3	8	8	7	9	7	7	13	16	10	13	25	18	21	24	24	25	34	38	24	34	24	0.865137
NLRP12	91662	728	830	296	952.5	869.5	735.2	0	0	0	3	1	0	3	0	0	4	2	0	3	1	4	4	2	6	3	3	4	9	6	7	2	8	13	14	0.769336
CELA2A	63036	596	749	816.5	732	784.5	735.6	0	0	0	0	0	0	0	0	0	0	0	0	0	1	0	0	0	0	0	0	0	0	0	0	0	0	0	0	-0.257115
ADD2	119	817	223	816.5	952.5	869.5	735.7	0	1	0	1	1	4	1	1	0	2	2	1	0	6	2	3	6	4	5	2	2	4	1	3	1	2	0	2	-0.205599
NPTN	27020	971	552	223.5	952.5	983.5	736.5	7	1	8	6	2	2	4	4	9	1	3	3	1	3	1	1	1	2	0	0	2	1	3	2	2	1	5	7	0.347251
HEBP1	50865	650	951	816.5	614.5	664.5	739.3	5	5	3	5	6	5	4	7	5	9	3	14	5	4	8	6	5	5	7	2	9	6	4	10	11	6	9	14	0.345208
RGS5	8490	721	429	816.5	952.5	784.5	740.7	0	0	0	0	0	0	0	0	0	0	0	1	1	2	1	3	1	5	4	2	2	5	8	3	7	4	4	2	0.593332
SIK1	150094	689	607	816.5	614.5	983.5	742.1	0	3	1	2	1	0	0	2	1	4	5	3	7	10	10	7	8	12	12	16	23	22	21	30	22	31	38	26	0.926834
ABCD1	215	631	756	816.5	732	784.5	744	0	2	0	3	9	6	8	6	7	10	12	5	10	14	12	24	21	21	13	13	10	17	26	28	19	40	32	36	0.771079
CNTRL	11064	838	550	816.5	732	784.5	744.2	3	7	15	8	7	12	16	15	20	20	19	22	20	17	29	35	29	29	27	24	41	27	34	49	49	50	53	50	0.877444
SHANK2	22941	814	819	816.5	614.5	664.5	745.7	2	1	2	0	1	2	2	5	1	7	8	7	7	6	13	13	11	10	11	18	18	25	23	22	32	46	43	47	0.90811
GJA4	2701	799	809	190.5	952.5	983.5	746.9	0	1	0	1	2	1	1	4	3	4	7	4	4	6	4	4	5	8	5	8	5	9	8	6	9	5	6	9	0.50227
PAPOLA	10914	933	754	816.5	251	983.5	747.6	44	44	45	45	44	48	55	64	84	68	74	73	80	88	91	95	67	76	79	82	86	92	109	141	122	103	104	135	0.748152
PAOX	196743	939	876	816.5	443	664.5	747.8	53	31	36	22	22	26	17	19	18	22	19	22	22	32	29	31	30	15	31	36	36	32	37	51	51	50	58	48	0.866162
ASAP2	8853	952	852	816.5	251	869.5	748.2	44	44	45	45	44	48	55	64	84	68	74	73	80	88	91	95	68	77	79	84	86	92	109	141	123	103	104	137	0.754035
CLNK	116449	913	916	91	952.5	869.5	748.4	20	5	5	3	2	10	7	9	9	10	20	9	7	16	16	15	19	22	22	27	29	19	21	19	19	32	22	25	0.646679
MOV10	4343	637	774	816.5	952.5	571	750.2	0	0	0	1	1	0	0	0	0	0	0	0	0	0	1	0	0	0	1	2	4	0	4	3	2	2	2	3	0.711754
TMEM132A	54972	959	921	190.5	812	869.5	750.4	0	1	0	0	2	1	2	2	5	9	5	5	6	3	3	0	5	1	4	2	2	5	5	3	9	3	7	9	0.359291
TLE4	7091	519	485	816.5	952.5	983.5	751.3	1	0	0	2	1	1	0	0	2	0	1	0	2	1	1	0	2	1	1	3	0	0	3	3	4	4	4	2	0.628702
PTPRE	5791	713	296	816.5	952.5	983.5	752.3	0	0	0	0	0	5	2	1	0	4	2	2	3	3	1	1	0	1	3	2	0	1	1	0	0	0	0	0	-0.700937
FLG	2312	833	886	816.5	614.5	614.5	752.9	8	7	7	6	6	12	10	7	6	6	5	6	5	6	6	6	13	26	38	38	30	54	55	62	65	53	50	67	0.938083
ZBP1	81030	808	627	816.5	732	784.5	753.6	1	5	5	5	6	9	5	3	5	6	5	8	6	12	9	2	14	15	5	9	12	10	45	32	34	56	47	59	0.834737
WNK4	65266	766	364	816.5	952.5	869.5	753.7	0	0	0	0	0	0	0	0	0	0	0	0	0	6	8	9	8	9	5	8	6	14	9	15	8	3	7	5	0.443281
MTPAP	55149	936	783	816.5	251	983.5	754	44	44	45	45	44	48	55	64	84	68	74	73	80	88	92	95	69	76	79	82	87	92	110	141	123	104	105	135	0.75614
SOCS5	9655	786	351	816.5	952.5	869.5	755.1	2	0	0	0	0	0	0	1	0	2	4	2	3	2	7	5	3	3	1	0	0	3	3	3	2	1	4	2	-0.289122
OXA1L	5018	993	786	816.5	567	614.5	755.4	4	8	4	6	6	10	10	11	13	14	18	13	15	24	22	19	24	28	30	34	43	42	66	78	73	83	108	142	0.900247
SLC4A4	8671	699	584	816.5	812	869.5	756.2	1	2	1	5	1	1	3	0	6	11	11	12	7	12	11	9	13	9	11	14	11	14	15	12	13	8	6	8	-0.111725
STK39	27347	638	773	548	952.5	869.5	756.2	0	0	0	0	1	0	0	0	0	0	3	1	2	2	2	4	4	3	9	7	10	11	18	14	18	19	18	8	0.852044
ACO1	48	670	473	816.5	952.5	869.5	756.3	5	12	11	11	15	13	15	17	23	14	13	15	27	14	20	31	20	18	14	12	10	17	14	18	16	18	10	11	-0.380364
TUB	7275	671	359	816.5	952.5	983.5	756.5	2	0	4	3	3	3	10	9	8	6	6	8	4	7	6	0	15	4	7	4	2	7	6	2	7	7	2	8	-0.0994021
HNMT	3176	616	850	816.5	732	784.5	759.8	3	4	6	3	7	6	3	3	6	3	8	2	9	9	6	4	6	6	7	4	11	5	12	8	4	11	15	13	0.514197
PBX2	5089	902	716	254	952.5	983.5	761.6	0	0	0	0	1	1	0	0	0	1	0	0	1	1	1	0	0	0	0	1	0	0	1	0	0	0	2	0	0.0453305
OMA1	115209	749	857	816.5	668	719.5	762	78	68	94	71	73	82	82	73	108	98	98	94	97	120	132	132	153	160	192	185	154	190	255	258	303	285	303	356	0.957594
PLA2G10	8399	665	817	816.5	732	784.5	763	0	0	0	0	0	0	1	1	0	4	4	6	5	4	4	4	7	5	5	12	9	6	5	7	14	7	10	11	0.658198
MPG	4350	815	591	816.5	732	869.5	764.8	12	9	8	7	8	5	18	13	14	8	14	12	6	18	16	19	20	22	18	22	29	36	43	35	55	41	40	40	0.89853
GAL3ST1	9514	972	589	816.5	732	719.5	765.8	8	1	4	6	2	6	6	4	2	3	5	2	5	3	2	1	4	7	2	8	11	8	9	10	12	9	12	14	0.845018
PPP1R9B	84687	743	1041	816.5	614.5	614.5	765.9	9	8	9	5	4	6	4	6	4	6	4	8	8	12	13	13	12	9	22	11	18	24	25	22	25	39	24	26	0.865992
MTM1	4534	600	736	816.5	812	869.5	766.8	0	0	0	0	3	2	2	5	8	8	8	11	11	13	6	10	6	3	7	6	9	12	14	12	9	9	16	9	0.255306
MRPS30	10884	986	802	816.5	251	983.5	767.8	44	44	45	45	44	48	55	64	84	68	74	74	80	88	91	95	67	76	79	82	86	93	110	141	123	103	105	135	0.751145
ARC	23237	725	959	816.5	952.5	387.5	768.1	0	0	0	0	0	0	0	0	0	1	1	1	1	0	4	4	4	4	8	6	9	12	4	7	9	4	9	10	0.765513
RIOX2	84864	960	384	816.5	812	869.5	768.4	0	2	2	3	1	4	5	5	4	4	5	5	7	10	8	5	5	11	4	10	5	8	7	14	10	14	8	13	0.581367
URI1	8725	853	502	816.5	812	869.5	770.6	0	1	2	1	5	4	10	6	7	8	4	5	3	6	4	3	3	2	5	1	2	3	8	13	12	14	13	9	0.674525
MFAP4	4239	685	533	816.5	952.5	869.5	771.3	0	0	0	0	0	0	0	0	0	0	0	0	0	0	0	0	0	0	0	0	1	3	1	4	1	6	4	1	0.686001
SLC25A1	6576	741	785	816.5	732	784.5	771.8	25	18	10	21	30	24	26	20	20	15	16	26	21	24	25	18	16	21	18	20	18	22	11	17	24	35	39	61	0.504233
DAND5	199699	1038	1004	816.5	952.5	49.5	772.1	4	4	3	4	3	3	3	2	5	2	3	6	5	2	8	8	6	8	6	9	16	7	10	14	13	22	23	25	0.859988
SLC22A8	9376	846	517	816.5	812	869.5	772.2	0	0	0	0	0	0	0	0	0	0	2	1	7	5	9	12	11	9	8	6	6	5	10	17	12	8	12	9	0.555533
ECSCR	641700	931	968	282.5	812	869.5	772.6	1	0	0	4	1	8	5	5	3	3	1	3	0	5	6	3	4	10	12	10	9	5	20	7	7	12	7	8	0.567783
PTRH1	138428	1005	966	816.5	952.5	124	772.8	0	0	0	0	0	0	0	0	0	0	1	0	1	0	1	0	1	0	0	1	0	0	2	3	2	0	0	2	0.31555
KCNJ5	3762	572	880	816.5	812	784.5	773	2	0	1	0	4	1	5	7	7	6	4	19	13	8	3	3	5	3	5	10	10	15	28	21	27	29	15	9	0.52854
CHIA	27159	957	811	425	812	869.5	774.9	1	0	3	1	2	1	0	0	1	2	8	2	5	6	6	8	4	8	9	19	10	11	13	21	19	31	26	40	0.855602
SLC30A8	169026	772	899	816.5	668	719.5	775	0	0	0	0	0	0	0	0	0	0	0	0	0	0	0	0	1	2	10	8	16	20	20	14	22	16	17	12	0.856487
PRSS33	260429	924	806	816.5	668	664.5	775.8	3	1	2	1	1	2	1	0	0	2	0	0	1	1	4	1	4	6	5	7	11	9	12	16	18	20	21	22	0.965356
CTNNA3	29119	542	839	816.5	812	869.5	775.8	0	1	0	2	1	0	0	0	0	0	0	2	0	1	4	0	0	4	1	1	1	1	1	2	2	2	3	0	0.158053
RBM45	129831	962	922	816.5	567	614.5	776.4	18	34	56	59	91	93	99	120	98	106	97	103	116	99	119	143	117	146	144	142	143	175	162	177	163	178	207	186	0.943248
SLC39A8	64116	810	804	816.5	732	719.5	776.4	0	0	0	0	0	0	0	0	0	0	0	0	0	0	0	1	1	0	5	3	0	2	8	4	4	4	6	8	0.803222
CACNB2	783	684	448	816.5	952.5	983.5	776.9	1	0	0	0	2	1	0	0	0	1	0	0	0	0	1	0	0	1	2	2	0	2	1	2	3	0	0	1	0.408229
ZNF362	149076	1021	866	816.5	567	614.5	777	0	0	0	0	0	1	1	1	0	1	2	0	0	0	0	0	0	0	0	0	0	0	0	0	0	0	0	0	-0.39736
SLC12A1	6557	792	891	816.5	668	719.5	777.4	1	1	2	0	0	1	1	2	1	0	0	3	2	1	3	2	2	4	3	9	4	9	7	4	7	5	12	4	0.687726
BATF	10538	666	919	483.5	952.5	869.5	778.1	0	0	0	0	0	1	2	0	1	0	1	1	1	3	0	1	0	1	1	2	3	8	6	11	13	24	13	25	0.819577
KCNJ1	3758	587	551	816.5	952.5	983.5	778.1	0	0	0	0	5	4	12	14	20	9	12	13	13	12	5	7	14	8	9	10	2	9	7	6	6	8	8	10	-0.474923
TAC4	255061	918	1030	13.5	952.5	983.5	779.5	0	0	1	0	0	0	0	1	0	0	0	0	0	0	0	0	0	1	1	1	1	2	0	3	3	6	3	0	0.642916
COG2	22796	943	860	816.5	614.5	664.5	779.7	0	2	0	0	3	0	1	0	2	4	3	5	0	4	4	8	9	10	16	9	14	11	22	29	28	33	36	26	0.919211
ATP5PO	539	816	529	816.5	952.5	784.5	779.7	0	0	2	0	2	3	1	2	4	1	1	0	1	1	1	0	0	1	1	2	0	1	1	0	1	3	1	2	0.405115
SRA1	10011	661	695	816.5	952.5	784.5	781.9	2	1	2	1	2	0	0	0	3	2	1	7	2	8	13	12	10	12	20	19	22	22	21	18	36	21	22	17	0.809099
PTER	9317	942	874	816.5	614.5	664.5	782.3	13	16	11	8	5	11	11	17	3	12	10	18	8	13	8	16	12	10	14	11	13	11	15	9	9	3	7	4	-0.52318
FLVCR2	55640	906	910	816.5	614.5	664.5	782.3	2	7	1	6	4	3	11	11	6	9	11	10	6	9	8	13	8	8	12	10	24	16	21	21	30	25	33	25	0.857128
TSPAN33	340348	843	973	816.5	567	719.5	783.8	38	27	36	40	33	32	30	38	35	49	38	57	48	72	66	73	82	80	96	92	120	123	125	113	130	125	124	114	0.933557
SLC26A5	375611	837	989	816.5	614.5	664.5	784.3	35	41	33	14	25	22	18	20	19	15	18	25	24	41	30	31	25	44	43	36	44	46	53	38	47	55	49	49	0.843455
SLBP	7884	981	847	816.5	614.5	664.5	784.7	1	3	2	5	4	3	4	8	4	10	4	16	11	4	14	10	8	5	10	6	10	5	7	12	16	8	13	20	0.333045
MATN1	4146	783	810	816.5	732	784.5	785.2	16	11	19	21	18	22	21	18	17	16	10	15	10	13	11	8	17	16	17	12	12	13	13	11	13	19	20	12	0.378791
SERPINB4	6318	687	603	816.5	952.5	869.5	785.7	0	0	1	0	0	1	1	1	2	3	4	4	0	0	1	3	0	0	3	1	1	3	3	1	1	1	2	1	-0.163929
FBXL15	79176	1027	924	816.5	732	436	787.1	1	0	2	4	2	4	11	15	12	28	26	30	27	32	32	26	25	29	39	38	26	43	40	45	51	48	45	41	0.807093
INSM1	3642	731	708	816.5	812	869.5	787.4	17	25	14	8	6	3	3	3	2	1	4	1	7	6	1	2	3	1	6	8	4	6	2	5	7	7	3	9	0.402728
CLCN6	1185	898	855	254	952.5	983.5	788.6	0	0	0	0	0	1	0	2	0	1	1	1	0	0	0	0	0	2	0	0	2	0	0	0	0	2	1	0	0.0630915
VSX1	30813	925	917	816.5	311.5	983.5	790.7	16	8	16	15	12	19	8	8	18	6	11	9	8	6	11	16	23	14	15	17	13	17	19	20	10	17	23	22	0.666951
CMAS	55907	976	887	816.5	614.5	664.5	791.7	1	0	2	1	2	2	3	4	1	2	3	1	3	3	1	4	5	5	1	5	4	5	4	1	7	2	4	7	0.417373
SLC22A5	6584	676	532	816.5	952.5	983.5	792.1	0	0	0	0	0	0	0	0	1	4	4	3	5	4	8	3	10	4	5	6	10	7	4	5	4	4	4	7	0.0938053
LAP3	51056	709	622	816.5	952.5	869.5	793.9	13	16	15	13	19	21	27	27	15	25	21	35	34	29	32	21	29	25	28	28	35	36	34	40	26	48	53	36	0.595182
DNLZ	728489	1001	974	816.5	567	614.5	794.6	44	56	61	49	48	62	48	38	54	53	49	45	40	56	54	65	55	72	67	70	78	66	88	88	95	90	80	70	0.850077
MED23	9439	795	444	816.5	952.5	983.5	798.3	0	0	0	0	0	1	1	2	4	6	6	4	9	5	6	3	5	6	7	2	10	5	12	6	9	13	5	7	0.37223
NAGA	4668	773	735	816.5	812	869.5	801.2	21	27	23	27	23	23	19	14	18	18	19	23	14	17	15	15	7	4	9	7	8	5	4	0	5	2	3	0	-0.905522
ARHGAP42	143872	990	996	91	952.5	983.5	802.6	0	0	0	0	0	0	0	0	0	0	0	0	0	0	0	0	0	0	0	0	0	0	0	1	1	0	0	4	0.499742
ATP2B3	492	813	456	816.5	952.5	983.5	804.3	0	1	2	2	1	3	1	0	2	4	1	2	2	1	1	1	2	3	2	0	2	2	3	2	1	2	0	2	0.032414
CSAD	51380	932	594	816.5	812	869.5	804.8	2	4	4	2	3	4	5	2	3	6	6	3	7	3	3	7	3	5	6	5	9	5	15	6	9	21	11	9	0.622456
ALOX12	239	732	796	816.5	812	869.5	805.2	0	0	0	1	1	1	0	0	0	0	0	0	1	2	0	0	2	5	2	4	5	5	4	5	3	5	2	2	0.614826
HLCS	3141	825	793	816.5	812	784.5	806.2	0	1	0	1	10	6	6	4	9	9	7	13	7	6	9	10	7	6	15	10	16	12	15	10	17	7	14	9	0.396768
PPM1K	152926	859	677	816.5	812	869.5	806.8	0	0	0	0	2	0	2	2	2	4	11	1	5	4	4	4	6	2	2	2	3	3	0	5	3	7	1	2	-0.359111
TXNRD3	114112	827	942	333.5	952.5	983.5	807.7	0	0	4	2	4	11	7	5	15	6	11	12	3	7	2	6	3	12	8	10	18	18	14	32	22	30	32	24	0.81288
ACADSB	36	742	545	816.5	952.5	983.5	807.9	0	0	0	0	1	1	0	0	0	0	0	0	0	0	0	0	0	1	0	1	1	0	0	0	0	0	0	2	0.335635
HTN1	3346	1014	1029	816.5	567	614.5	808.2	0	1	1	2	2	5	2	1	7	5	9	3	3	6	7	4	4	5	7	6	6	8	7	8	20	13	17	17	0.741932
ENOSF1	55556	985	853	816.5	668	719.5	808.4	2	1	2	1	1	2	8	4	5	4	1	5	4	7	8	13	12	13	8	22	19	30	18	13	17	30	14	17	0.719716
NANOS1	340719	780	994	816.5	732	719.5	808.4	0	0	0	0	0	0	0	0	0	4	2	3	1	5	2	1	2	6	6	5	7	9	10	4	5	6	9	4	0.615191
NREP	9315	818	963	816.5	732	719.5	809.8	0	0	0	1	0	1	0	1	2	1	1	1	1	0	2	1	3	2	6	1	4	0	4	1	1	9	3	6	0.516767
DBNL	28988	633	778	816.5	952.5	869.5	809.9	1	0	2	4	3	4	3	1	1	4	4	11	3	5	6	7	5	4	5	8	5	4	14	7	20	13	6	6	0.391226
AARS	16	797	726	816.5	952.5	784.5	815.3	2	2	0	1	2	2	4	3	1	2	4	0	0	1	2	0	2	2	1	4	2	5	4	0	3	7	3	7	0.586428
CIAO3	64428	1026	928	190.5	952.5	983.5	816.1	3	7	2	3	5	3	3	3	3	1	3	5	2	7	5	2	6	14	11	9	6	8	6	8	9	7	3	16	0.456385
GOSR2	9570	800	794	816.5	812	869.5	818.4	1	1	1	1	0	0	0	2	0	2	0	0	0	0	0	2	0	0	1	1	0	3	2	4	1	0	1	2	0.504846
SCGB3A2	117156	881	1014	816.5	668	719.5	819.8	0	0	0	0	0	0	0	0	0	0	0	1	3	1	1	3	0	0	1	1	0	2	0	0	2	1	1	0	-0.193142
ZGPAT	84619	855	747	816.5	812	869.5	820	0	4	3	5	11	4	4	4	9	21	12	10	15	18	25	21	22	15	41	35	31	36	48	55	58	56	37	63	0.901828
EVA1C	59271	1019	987	816.5	614.5	664.5	820.3	77	64	77	109	113	132	115	85	111	111	109	89	117	82	112	95	120	103	86	101	101	94	91	96	92	81	87	80	-0.534383
SLC4A7	9497	866	490	816.5	952.5	983.5	821.7	0	0	0	0	0	0	0	0	0	4	3	3	2	1	5	3	3	3	6	1	6	4	5	6	1	1	4	3	0.107103
MAT2B	27430	842	518	816.5	952.5	983.5	822.5	0	0	4	2	4	9	5	3	10	5	10	11	1	7	2	4	1	9	8	8	19	17	12	32	22	28	34	23	0.80059
FADS2	9415	548	815	816.5	952.5	983.5	823.1	5	4	1	6	2	3	4	1	1	4	4	6	13	13	5	7	6	6	10	8	17	12	12	11	13	10	15	14	0.600323
XYLT2	64132	909	878	816.5	732	784.5	824	39	36	25	37	28	49	56	38	45	42	53	39	43	29	37	40	43	54	47	55	48	54	55	65	52	57	63	61	0.757087
WDR36	134430	941	832	816.5	812	719.5	824.2	0	0	0	0	0	0	0	0	0	0	0	0	0	0	0	0	3	3	4	3	1	5	0	0	4	0	0	1	0.197836
KCNIP4	80333	719	765	816.5	952.5	869.5	824.5	0	0	0	0	0	0	0	0	1	0	0	0	1	0	1	1	1	1	1	0	2	0	1	3	0	0	1	0	0.113327
GJA5	2702	771	957	575	952.5	869.5	825	0	0	2	3	3	5	3	3	7	4	10	10	5	9	7	10	15	15	11	16	10	14	16	17	16	14	10	13	0.576041
CYP2R1	120227	558	818	816.5	952.5	983.5	825.7	0	0	0	0	0	0	1	0	0	0	1	2	0	1	2	1	0	2	2	0	0	2	6	3	12	8	3	6	0.634344
PM20D1	148811	988	954	816.5	668	719.5	829.2	0	0	0	0	0	1	0	1	0	1	0	1	0	0	0	0	0	1	0	0	1	1	0	1	3	0	7	5	0.62178
TACR2	6865	953	582	816.5	812	983.5	829.4	1	4	2	2	5	2	1	1	2	1	0	1	3	2	1	0	0	0	2	2	0	2	1	1	4	0	2	3	0.294022
GNE	10020	611	784	816.5	952.5	983.5	829.5	0	0	0	0	0	0	1	1	0	0	0	0	6	8	7	3	3	8	11	6	8	9	11	15	23	16	10	22	0.82451
ENC1	8507	693	703	816.5	952.5	983.5	829.7	0	0	0	0	0	1	0	2	3	1	4	2	1	4	5	7	3	3	4	7	7	3	4	5	3	8	10	5	0.506319
NPSR1	387129	911	908	816.5	732	784.5	830.4	0	0	0	0	0	0	0	0	1	0	0	0	0	0	2	4	3	6	2	7	17	10	8	14	13	11	5	8	0.736784
BATF2	116071	885	1005	816.5	732	719.5	831.6	0	0	0	0	0	1	0	0	0	0	0	0	0	1	5	2	4	3	6	6	9	10	8	6	15	20	16	14	0.906304
ORMDL3	94103	884	782	816.5	812	869.5	832.8	0	0	0	0	0	0	0	0	0	0	0	0	0	0	0	0	0	1	3	0	1	2	2	10	4	10	5	12	0.786843
PYHIN1	149628	1018	958	254	952.5	983.5	833.2	0	0	0	0	0	0	0	0	0	0	0	0	0	0	1	0	0	0	0	0	0	0	0	0	1	1	0	1	0.412112
SLC25A18	83733	1029	805	816.5	732	784.5	833.4	5	1	1	1	1	0	2	3	2	0	0	0	1	1	0	0	1	2	1	1	0	0	3	1	4	9	4	4	0.675859
AMY1A	276	978	988	816.5	668	719.5	834	2	4	2	1	0	2	2	1	0	1	2	1	1	3	5	2	7	8	6	13	15	7	19	16	14	23	17	22	0.917961
APBB3	10307	982	556	816.5	952.5	869.5	835.3	2	1	2	1	2	0	0	0	3	4	1	7	4	6	11	10	6	8	12	9	13	14	11	11	19	10	15	10	0.724646
DRAM1	55332	892	790	816.5	812	869.5	836	0	1	0	1	0	0	0	0	0	0	0	2	0	0	0	0	1	2	0	5	2	7	7	10	6	9	6	5	0.805434
KLK9	284366	599	829	816.5	952.5	983.5	836.1	0	0	0	0	0	0	0	0	0	0	1	0	0	0	0	0	1	0	0	0	0	0	0	0	0	2	0	4	0.380823
CRTAP	10491	634	798	816.5	952.5	983.5	836.9	0	0	2	0	1	0	0	17	3	17	0	13	10	16	5	27	11	23	15	41	29	38	34	43	49	33	51	32	0.846014
TBCA	6902	926	712	816.5	952.5	784.5	838.3	4	5	6	7	5	7	5	1	7	8	6	4	7	5	3	5	7	11	7	16	14	6	20	21	16	20	19	16	0.833527
CYTIP	9595	856	596	816.5	952.5	983.5	840.9	2	3	6	2	3	1	5	17	4	18	4	17	14	19	7	31	16	25	19	41	23	42	39	50	55	36	52	41	0.855036
GSPT1	2935	768	690	816.5	952.5	983.5	842.1	1	1	1	1	1	0	2	0	0	0	0	0	0	0	0	1	1	0	1	1	0	0	0	0	1	0	2	0	0.262917
GUCA2A	2980	820	897	816.5	812	869.5	843	1	1	7	6	10	10	8	21	12	14	12	9	10	3	9	12	5	5	3	2	2	2	4	4	6	5	6	2	-0.604779
GIMAP5	55340	904	825	816.5	812	869.5	845.4	0	0	0	0	0	0	0	0	0	0	0	0	0	3	3	2	0	3	0	3	1	1	0	0	2	5	0	0	0.0528214
SLC35A1	10559	889	1007	816.5	732	784.5	845.8	6	1	3	6	2	5	4	4	2	2	3	3	5	3	1	1	4	6	2	6	11	7	9	9	11	9	12	14	0.858754
CRAT	1384	841	636	816.5	952.5	983.5	845.9	2	5	3	4	5	3	6	2	7	2	4	7	4	4	6	1	4	2	2	3	1	2	2	3	10	2	4	4	-0.0904847
CPA3	1359	543	938	816.5	952.5	983.5	846.7	0	1	1	0	0	0	0	0	0	1	0	0	0	0	1	1	0	0	0	1	0	0	1	0	1	0	0	2	0.335445
GIMAP4	55303	851	885	816.5	812	869.5	846.8	0	0	0	0	0	0	0	0	0	0	0	0	0	0	0	0	1	0	0	0	0	0	0	0	0	1	0	1	0.359164
DPP10	57628	919	986	816.5	732	784.5	847.6	0	0	0	2	0	0	0	0	0	0	0	0	1	1	1	2	3	1	1	0	3	0	2	1	2	6	2	0	0.351704
MUTYH	4595	872	633	816.5	952.5	983.5	851.5	3	0	2	2	2	8	10	7	11	7	17	14	19	28	42	37	46	56	48	65	68	62	70	71	62	75	62	62	0.890771
ORAI1	84876	580	1041	816.5	952.5	869.5	851.9	0	0	0	0	0	0	0	0	0	0	0	0	0	0	1	0	7	6	18	22	22	20	35	22	27	34	45	33	0.937114
SPEN	23013	886	621	816.5	952.5	983.5	851.9	2	2	0	0	2	5	1	0	6	8	7	12	8	7	11	7	14	12	12	9	22	15	16	19	12	20	13	22	0.720729
NPW	283869	923	846	816.5	812	869.5	853.4	0	0	0	0	0	0	0	0	0	2	2	0	1	3	1	5	5	4	7	2	5	2	2	3	3	5	4	1	0.221903
IER3IP1	51124	966	663	816.5	952.5	869.5	853.5	2	2	1	5	0	2	1	3	0	9	9	9	5	9	10	12	10	13	19	8	10	11	15	6	9	6	7	10	-0.0489545
FLAD1	80308	869	762	816.5	952.5	869.5	853.9	3	5	1	3	3	2	2	4	0	2	2	0	6	3	2	1	2	6	5	13	24	24	24	32	25	28	31	38	0.927683
WIPF2	147179	980	797	816.5	812	869.5	855	0	0	0	0	0	0	0	0	0	0	1	0	1	0	1	1	0	0	1	0	0	2	1	1	0	2	2	0	0.256451
CRISP3	10321	928	1017	816.5	732	784.5	855.6	0	0	0	1	0	1	2	0	1	0	0	0	4	1	1	1	1	3	0	2	3	6	2	2	4	1	4	2	0.434312
SLC2A10	81031	877	651	816.5	952.5	983.5	856.1	4	6	6	4	1	9	11	9	1	12	16	10	6	16	9	22	17	12	10	17	14	17	38	35	35	34	30	25	0.746853
TM9SF3	56889	1033	620	816.5	952.5	869.5	858.3	0	0	0	0	0	0	0	0	0	0	0	0	0	0	0	0	0	0	0	0	0	0	0	0	1	0	0	0	0.257115
SLC2A12	154091	1013	877	816.5	812	784.5	860.6	0	0	0	0	0	0	0	0	0	0	1	1	3	6	4	4	6	1	3	4	1	3	1	3	3	4	0	2	-0.196996
LLGL2	3993	785	768	816.5	952.5	983.5	861.1	0	1	0	1	0	0	0	4	2	1	0	2	0	0	1	2	1	0	1	4	1	2	2	1	0	0	1	1	0.0678462
FRMD6	122786	989	572	816.5	952.5	983.5	862.7	0	0	0	0	0	0	0	0	0	0	0	1	1	0	2	1	1	0	0	1	0	2	4	2	0	0	2	0	0.143942
TLX1NB	100038246	1041	1041	816.5	443	983.5	865	4	5	5	2	5	3	3	5	6	6	4	9	7	9	3	5	5	6	3	7	7	13	11	11	9	10	8	7	0.458941
RNLS	55328	935	905	816.5	812	869.5	867.6	0	0	0	0	0	0	0	0	0	0	0	0	0	0	0	2	0	3	3	1	5	10	17	16	21	29	24	17	0.879576
SUCO	51430	1002	840	816.5	812	869.5	868	3	4	1	8	6	6	5	8	9	9	9	4	5	10	20	11	24	27	22	36	30	48	36	44	45	53	60	56	0.962975
CPA4	51200	844	858	816.5	952.5	869.5	868.1	0	0	0	0	0	0	0	0	0	1	0	0	0	1	0	1	0	0	0	0	1	0	1	0	0	1	4	2	0.526013
LPCAT3	10162	917	945	816.5	812	869.5	872	3	0	1	0	0	1	0	2	1	3	3	1	0	1	0	1	2	0	3	3	4	4	9	7	8	13	5	8	0.796839
RHNO1	83695	1028	1010	816.5	732	784.5	874.2	4	15	5	14	15	7	13	8	12	10	18	18	16	17	12	20	14	18	17	19	22	24	20	35	38	36	28	30	0.786844
SHCBP1	79801	938	685	816.5	952.5	983.5	875.1	6	3	9	6	5	3	9	10	11	8	12	10	14	8	19	14	18	17	13	22	17	12	33	21	28	21	30	28	0.771494
GSTA5	221357	612	1011	816.5	952.5	983.5	875.1	0	0	0	0	0	0	1	0	0	0	0	0	1	0	0	0	0	0	0	0	0	0	0	0	0	0	0	0	-0.303863
FXYD5	53827	836	906	816.5	952.5	869.5	876.1	0	0	0	0	0	2	1	1	1	1	4	1	4	8	9	20	11	10	15	18	28	62	32	21	13	19	18	20	0.510245
OPTC	26254	949	935	816.5	812	869.5	876.4	1	2	0	3	5	5	3	4	8	8	6	2	4	11	18	10	21	29	18	33	31	42	38	44	42	48	50	47	0.964445
U2AF1L5	102724594	1042	1041	816.5	952.5	531	876.6	0	0	0	0	0	0	0	0	0	0	0	0	0	0	0	0	0	0	0	0	0	0	0	0	0	0	0	0	#VALUE!
KCNJ13	3769	688	944	816.5	952.5	983.5	876.9	2	0	0	0	2	2	3	1	3	2	5	5	1	6	4	4	3	2	8	3	1	3	8	14	8	16	13	13	0.686165
PNMT	5409	839	912	816.5	952.5	869.5	877.9	8	5	12	11	8	8	11	4	6	12	1	11	10	9	6	13	7	9	37	45	36	31	32	18	7	12	11	7	0.233203
NT5C1A	84618	991	1008	816.5	812	784.5	882.4	0	0	0	0	1	2	2	1	8	4	3	4	0	2	2	6	4	4	3	4	6	8	1	3	5	7	13	10	0.645992
DCD	117159	915	947	816.5	952.5	784.5	883.1	5	6	2	1	4	6	5	5	5	5	9	13	10	19	14	22	27	25	33	47	29	46	53	55	63	66	76	85	0.965718
FXYD2	486	690	982	816.5	952.5	983.5	884.9	0	0	0	0	0	0	0	0	0	0	1	1	1	1	1	3	1	1	2	1	2	3	3	2	2	3	5	0	0.463512
PHF11	51131	975	813	816.5	952.5	869.5	885.3	0	1	0	0	0	0	1	3	2	2	1	1	5	7	1	5	7	8	18	25	25	21	34	27	48	41	31	35	0.917987
CLCNKB	1188	852	826	816.5	952.5	983.5	886.1	0	0	0	0	0	0	1	1	0	2	3	1	2	3	3	4	4	3	5	2	3	2	1	3	3	3	6	4	0.310704
WDTC1	23038	954	731	816.5	952.5	983.5	887.5	0	0	0	0	0	0	0	0	0	0	0	0	0	0	0	0	0	0	0	0	0	0	0	0	0	0	1	0	0.350612
RABGAP1L	9910	804	881	816.5	952.5	983.5	887.5	0	0	0	1	0	0	0	0	0	0	1	1	0	0	1	0	2	0	0	1	0	0	0	0	3	0	1	0	-0.0128785
DENND1B	163486	995	949	816.5	812	869.5	888.4	0	0	0	0	0	0	0	0	0	0	0	0	0	0	0	0	0	0	0	0	2	0	0	0	1	1	1	1	0.574962
GJC1	10052	934	760	816.5	952.5	983.5	889.3	0	0	1	0	7	3	3	3	4	3	4	13	9	5	8	5	8	4	4	5	6	6	6	4	3	2	2	10	-0.397746
ROM1	6094	891	943	816.5	952.5	869.5	894.5	14	13	14	11	12	22	26	20	26	26	35	24	26	17	12	25	18	11	18	15	9	20	25	29	14	20	8	16	-0.395055
SLC26A6	65010	914	816	816.5	952.5	983.5	896.5	0	0	0	0	0	0	0	0	0	1	0	0	1	1	1	2	4	2	4	4	0	0	3	4	3	2	4	0	0.348998
OSER1	51526	1039	948	816.5	812	869.5	897	0	0	0	0	0	0	0	0	0	0	0	0	2	0	1	2	2	1	2	2	0	4	5	3	6	5	7	4	0.820578
ZNF160	90338	1015	977	816.5	812	869.5	898	54	67	63	53	61	57	54	41	57	28	51	45	49	52	59	54	56	57	48	33	61	45	58	72	76	51	78	61	0.509551
SEMA6C	10500	900	843	816.5	952.5	983.5	899.1	0	0	0	0	0	0	0	0	0	1	0	0	0	0	0	0	1	0	1	0	0	0	0	1	0	0	0	0	0.0430997
SDK1	221935	1024	723	816.5	952.5	983.5	899.9	0	0	0	0	0	0	0	0	0	0	0	0	0	0	0	0	0	0	0	0	1	0	0	0	0	0	0	0	0.0701223
HRH3	11255	888	862	816.5	952.5	983.5	900.5	3	7	7	10	14	14	13	12	29	23	21	22	26	22	26	20	29	30	30	25	34	24	26	29	23	14	22	31	0.0868515
ARHGAP6	395	951	812	816.5	952.5	983.5	903.1	0	0	0	0	0	0	0	1	0	0	1	1	0	1	0	1	0	0	0	1	1	0	3	0	0	0	1	0	-0.0702879
SIK1B	102724428	1044	1041	816.5	952.5	664.5	903.7	0	0	0	0	0	0	0	0	0	0	0	0	0	0	0	0	0	0	0	0	0	0	0	0	0	0	0	0	#VALUE!
ZC3HC1	51530	921	845	816.5	952.5	983.5	903.7	0	0	0	0	0	0	0	0	0	1	0	0	1	2	2	3	0	3	4	1	2	5	5	3	7	1	1	5	0.53296
NMRK2	27231	1006	761	816.5	952.5	983.5	903.9	0	0	0	0	1	0	1	1	0	3	1	0	1	1	0	0	0	0	0	0	1	0	1	0	1	0	0	0	-0.227155
ZBTB10	65986	854	915	816.5	952.5	983.5	904.3	0	0	0	0	0	0	0	0	0	0	0	0	0	0	0	0	0	0	0	0	0	0	0	0	0	1	0	0	0.303863
MLN	4295	793	1003	816.5	952.5	983.5	909.7	16	10	19	20	28	22	20	25	17	12	20	23	29	18	23	29	23	24	27	16	33	32	42	37	34	38	67	33	0.688575
CLCNKA	1187	973	838	816.5	952.5	983.5	912.7	0	0	0	0	0	0	1	0	1	1	4	2	1	2	1	0	0	2	3	0	1	1	0	1	1	1	0	0	-0.535438
ZNF365	22891	912	900	816.5	952.5	983.5	912.9	0	1	0	0	0	0	0	2	1	0	2	0	2	2	2	0	1	0	1	0	0	2	2	2	1	1	1	1	-0.0529519
SLC9C1	285335	1040	1041	816.5	812	869.5	915.8	0	3	5	16	16	26	32	21	36	51	34	60	44	40	41	35	42	49	47	47	35	60	50	65	45	54	35	35	0.113144
CEACAM7	1087	950	884	816.5	952.5	983.5	917.3	0	0	0	0	1	0	0	1	1	0	1	0	0	0	0	0	1	0	0	0	0	1	0	0	0	0	0	0	-0.244232
SLCO4C1	353189	947	904	816.5	952.5	983.5	920.7	0	0	0	0	0	0	0	0	0	0	0	0	0	0	0	0	0	0	0	1	0	1	2	2	0	0	0	0	0.305184
WAPL	23063	996	856	816.5	952.5	983.5	920.9	8	11	8	11	14	21	23	16	23	16	25	30	33	32	51	33	58	56	70	72	73	88	96	120	124	126	128	151	0.974522
PIMREG	54478	1000	870	816.5	952.5	983.5	924.5	0	0	0	0	0	0	0	0	0	0	0	1	0	0	1	0	0	0	0	0	0	1	0	0	0	0	0	2	0.143843
SCN7A	6332	871	1015	816.5	952.5	983.5	927.7	8	10	6	6	2	9	5	6	5	2	6	6	11	10	10	11	11	8	12	11	11	6	17	13	16	9	11	8	0.362919
ACSM1	116285	894	1000	816.5	952.5	983.5	929.3	1	0	0	0	0	0	2	0	1	1	1	3	0	0	3	0	1	0	1	0	1	0	4	8	2	3	1	2	0.320373
TIMD4	91937	870	1026	816.5	952.5	983.5	929.7	0	1	0	0	0	0	0	0	0	0	0	0	0	0	1	1	2	7	4	2	4	5	4	8	9	8	16	7	0.84132
AMDHD2	51005	1010	888	816.5	952.5	983.5	930.1	0	3	0	2	0	0	1	0	0	0	1	2	1	2	3	2	1	0	2	2	3	3	4	0	5	1	3	0	0.146431
PKDCC	91461	945	953	816.5	952.5	983.5	930.1	0	0	0	0	0	0	0	0	0	0	0	0	0	0	0	0	0	0	0	2	0	0	0	0	2	2	0	1	0.474732
PIF1	80119	1004	896	816.5	952.5	983.5	930.5	4	2	1	1	1	2	2	2	1	3	4	4	3	5	5	7	13	15	8	24	14	22	26	20	27	20	37	45	0.90247
STK19	8859	1003	898	816.5	952.5	983.5	930.7	5	4	3	8	12	12	4	8	6	10	11	12	10	15	7	10	12	5	8	8	8	9	14	12	5	13	10	6	-0.220998
AHSP	51327	977	933	816.5	952.5	983.5	932.5	29	29	36	26	27	17	11	4	4	3	2	6	5	3	7	4	5	4	7	5	9	2	2	2	6	2	1	4	-0.269102
SPRR2B	6701	948	965	816.5	952.5	983.5	933.1	0	0	0	0	0	0	0	0	0	0	0	0	0	0	0	0	0	0	0	0	0	0	1	0	0	0	0	0	0.163619
PLEKHA7	144100	979	940	816.5	952.5	983.5	934.3	0	0	0	0	0	0	0	0	0	0	0	0	0	0	0	0	0	0	0	0	2	2	1	1	4	3	2	1	0.724795
SLC6A18	348932	1007	927	816.5	952.5	983.5	937.3	0	0	0	0	0	0	0	0	0	0	0	0	0	0	0	0	1	0	1	1	0	1	0	0	0	0	0	0	0
LRIT1	26103	1011	934	816.5	952.5	983.5	939.5	6	3	9	6	5	3	9	10	11	8	12	10	14	8	19	14	18	17	13	22	17	12	33	18	24	21	27	27	0.732967
RP1	6101	956	997	816.5	952.5	983.5	941.1	2	3	1	2	3	3	2	4	3	8	6	8	8	15	8	10	11	5	7	8	8	6	14	10	5	12	7	6	-0.079382
PSORS1C1	170679	1009	967	816.5	952.5	983.5	945.7	0	0	0	0	0	0	0	0	0	0	0	0	0	1	1	2	0	0	0	0	0	0	0	2	0	1	1	5	0.419327
TMEM38A	79041	992	990	816.5	952.5	983.5	946.9	0	0	0	0	0	0	0	0	0	0	0	0	0	0	0	0	0	0	0	0	2	1	0	2	0	0	1	1	0.481611
CMTR1	23070	1012	971	816.5	952.5	983.5	947.1	0	0	0	0	0	0	0	0	0	0	0	0	0	0	0	0	0	0	1	0	0	0	1	0	0	1	0	0	0.272965
ATPAF1	64756	1032	952	816.5	952.5	983.5	947.3	0	0	1	0	1	0	0	0	0	0	1	1	1	2	0	0	0	0	0	0	0	1	0	0	0	0	0	0	-0.574962
GSDMB	55876	968	1021	816.5	952.5	983.5	948.3	0	0	0	0	0	0	0	0	0	0	0	0	0	0	1	0	1	0	3	2	1	1	1	2	2	5	4	9	0.756771
ZPBP2	124626	1025	970	816.5	952.5	983.5	949.5	0	0	0	0	0	0	0	0	0	0	0	0	0	0	0	0	0	0	0	0	1	0	0	0	0	0	0	1	0.340733
C5orf56	441108	970	1028	816.5	952.5	983.5	950.1	0	0	0	0	0	0	0	0	0	0	0	0	0	0	0	0	0	0	0	0	0	0	0	0	0	0	0	0	#VALUE!
TMTC1	83857	998	1002	816.5	952.5	983.5	950.5	1	2	0	5	2	0	3	3	7	1	6	5	6	3	2	3	6	2	2	1	2	3	2	2	3	3	0	2	-0.652422
SLC4A5	57835	1023	983	816.5	952.5	983.5	951.7	0	0	0	0	0	0	0	0	0	0	2	1	2	1	1	0	0	0	1	0	0	1	2	1	0	3	0	0	-0.172996
CEACAM4	1089	1008	1009	816.5	952.5	983.5	953.9	10	11	4	8	7	7	3	3	4	3	1	3	6	3	2	4	3	7	4	1	8	6	4	6	6	9	9	4	0.584928
ZNF665	79788	1036	984	816.5	952.5	983.5	954.5	0	0	0	0	0	0	0	0	0	0	0	0	0	0	0	0	0	0	0	0	0	0	0	0	0	0	0	0	#VALUE!
TMEM245	23731	1030	998	816.5	952.5	983.5	956.1	2	3	7	8	6	3	7	5	6	8	7	11	10	8	6	8	7	6	8	7	7	2	1	6	0	0	1	1	-0.84558
C6orf10	10665	1016	1019	816.5	952.5	983.5	957.5	0	0	0	0	0	0	0	0	0	0	0	0	0	0	0	0	1	1	0	0	0	0	0	0	0	0	0	0	-0.136293
GSDMA	284110	1017	1022	816.5	952.5	983.5	958.3	0	0	0	0	0	0	0	0	0	0	1	0	0	0	1	0	0	2	0	1	1	4	3	2	0	6	2	5	0.665579
CDHR3	222256	1035	1012	816.5	952.5	983.5	959.9	0	0	0	0	0	0	0	0	0	0	0	0	0	0	0	0	0	0	0	0	0	0	0	0	1	1	0	3	0.549538
REXO1L1P	254958	1034	1013	816.5	952.5	983.5	959.9	1	6	7	5	11	5	4	1	2	3	0	2	1	0	2	1	2	3	0	1	2	2	0	1	2	1	2	2	0.230697
ZNF831	128611	1022	1025	816.5	952.5	983.5	959.9	0	0	0	0	0	0	0	0	0	0	0	0	0	0	0	0	0	0	0	0	0	0	0	0	0	0	0	0	#VALUE!
STEAP1B	256227	1037	1027	816.5	952.5	983.5	963.3	20	24	21	30	22	26	19	17	29	26	26	26	34	38	30	25	34	32	28	40	38	42	39	37	39	41	45	53	0.807038
ACT	389036	1031	1041	816.5	952.5	983.5	964.9	0	0	0	0	0	0	0	0	0	0	0	0	0	0	0	0	0	0	0	0	0	0	0	0	0	0	0	0	#VALUE!
LOC100507709	100507709	1043	1041	816.5	952.5	983.5	967.3	0	0	0	0	0	0	0	0	0	0	0	0	0	0	0	0	0	0	0	0	0	0	0	0	0	0	0	0	#VALUE!
NR2F2-AS1	644192	1045	1041	816.5	952.5	983.5	967.7	0	0	0	0	0	0	0	0	0	0	0	0	0	0	0	0	0	0	0	0	0	0	0	0	0	0	0	0	#VALUE!
LOC102723576	102723576	1046	1041	816.5	952.5	983.5	967.9	0	0	0	0	0	0	0	0	0	0	0	0	0	0	0	0	0	0	0	0	0	0	0	0	0	0	0	0	#VALUE!
LOC101928940	101928940	1047	1041	816.5	952.5	983.5	968.1	0	0	0	0	0	0	0	0	0	0	0	0	0	0	0	0	0	0	0	0	0	0	0	0	0	0	0	0	#VALUE!
TRI-AAT7-2	100189401	1048	1041	816.5	952.5	983.5	968.3	0	0	0	0	0	0	0	0	0	0	0	0	0	0	0	0	0	0	0	0	0	0	0	0	0	0	0	0	#VALUE!
HCG23	414764	1049	1041	816.5	952.5	983.5	968.5	0	0	0	0	0	0	0	0	0	0	0	0	0	0	0	0	0	0	0	0	0	0	0	0	0	0	0	0	#VALUE!
LOC101928947	101928947	1050	1041	816.5	952.5	983.5	968.7	0	0	0	0	0	0	0	0	0	0	0	0	0	0	0	0	0	0	0	0	0	0	0	0	0	0	0	0	#VALUE!
LOC101929857	101929857	1051	1041	816.5	952.5	983.5	968.9	0	0	0	0	0	0	0	0	0	0	0	0	0	0	0	0	0	0	0	0	0	0	0	0	0	0	0	0	#VALUE!
