# Supplementary material for: Search for New Candidate Genes Involved in the Comorbidity of Asthma and Hypertension Based on Automatic Analysis of Scientific Literature
Source: publisher site journal article supplement (doi:10.1515/jib-2018-0054), 2018-12-01
Supplement: Supplementary file 2 [file Appendix_2.xlsx]

## Sheet: top10
IntId	IntSchema	IntType	IntLinks	Sentences	ObjId1	ObjType1	ObjName1	ObjSymonyms1	ObjLinks1	ObjId2	ObjType2	ObjName2	ObjSymonyms2	ObjLinks2
1115	APP --> APP	Expression	GeneID:351;		4340093	Gene	APP	AAA;ABETA;ABPP;AD1;amyloid beta precursor protein;APP;APPI;CTFgamma;CVAP;PN-II;PN2;A4;aaa-type;Alzheimer disease amyloid protein;alzheimer's disease amyloid protein;amyloid b precursor protein;amyloid b protein precursor;amyloid b-protein precursor;Amyloid beta A4 protein;amyloid beta protein a4;amyloid beta- protein precursor;amyloid beta-a4 protein;amyloid beta-protein precursor;Amyloid precurs…	SWISSPROT_AC:P05067;SWISSPROT_ID:A4_HUMAN;GeneID:351;Ensembl:ENSG00000142192;HGNC:HGNC:620;MIM:104760;Vega:OTTHUMG00000078438;protein_accession:AAA35540.1;protein_accession:AAA51564.1;protein_accession:AAA51722.1;protein_accession:AAA51726.1;protein_accession:AAA51727.1;protein_accession:AAA51768.1;protein_accession:AAA58727.1;protein_accession:AAA60163.1;protein_accession:AAB19991.1;protein_acce…	3186	Protein	APP	A4;ABPP;AD1;Alzheimer disease amyloid protein;Amyloid beta A4 protein;Amyloid precursor protein;APP;APPI;Beta-amyloid precursor protein;Cerebral vascular amyloid peptide;CVAP;PN-II;PreA4;Protease nexin-II;AAA;aaa-type;ABETA;alzheimer's disease amyloid protein;amyloid b precursor protein;amyloid b protein precursor;amyloid b-protein precursor;amyloid beta precursor protein;amyloid beta protein a4;…	SWISSPROT_AC:P05067;SWISSPROT_ID:A4_HUMAN;EMBL:AB066441;EMBL:AF282245;EMBL:AK295621;EMBL:AK312326;EMBL:AP001439;EMBL:AP001440;EMBL:AP001441;EMBL:AP001442;EMBL:AP001443;EMBL:AY919674;EMBL:BC004369;EMBL:BC065529;EMBL:CH471079;EMBL:D87675;EMBL:M15532;EMBL:M15533;EMBL:M16765;EMBL:M18734;EMBL:M24546;EMBL:M24547;EMBL:M28373;EMBL:M29269;EMBL:M29270;EMBL:M33112;EMBL:M34862;EMBL:M34863;EMBL:M34864;EMBL:M3…
30150	CD40LG --> CD40L	Expression	GeneID:959;		4340589	Gene	CD40LG	CD154;CD40 ligand;CD40L;CD40LG;gp39;hCD40L;HIGM1;IGM;IMD3;T-BAM;TNFSF5;TRAP;cd 154;cd 40 l;cd 40 ligand;cd-40 ligand;cd-40-ligand;CD154 antigen;cd40 l;cd40 ligand--an;CD40-L;cd40-ligand;cd40l g;cd40l--an;higm type 1;higm-1;l-cd40;ligand cd40;ligand of cd40;ligand--cd40;ligand-cd40;t cell antigen gp39;T-cell antigen Gp39;TNF-related activation protein;Tumor necrosis factor ligand superfamily membe…	SWISSPROT_AC:P29965;SWISSPROT_ID:CD40L_HUMAN;GeneID:959;Ensembl:ENSG00000102245;HGNC:HGNC:11935;MIM:300386;Vega:OTTHUMG00000022512;protein_accession:AAA35662.1;protein_accession:AAC41932.1;protein_accession:AAD13982.1;protein_accession:AAH71754.1;protein_accession:AAH74950.1;protein_accession:AAP37943.1;protein_accession:AAQ09090.1;protein_accession:AAZ23548.1;protein_accession:ABK41936.1;protein…	59248	Protein	CD40L	CD154 antigen;CD40 ligand;CD40-L;CD40L;CD40LG;T-cell antigen Gp39;TNF-related activation protein;TNFSF5;TRAP;Tumor necrosis factor ligand superfamily member 5;cd 154;cd 40 l;cd 40 ligand;cd-40 ligand;cd-40-ligand;CD154;cd40 l;cd40 ligand--an;cd40-ligand;cd40l g;cd40l--an;gp39;hCD40L;higm type 1;higm-1;HIGM1;IGM;IMD3;l-cd40;ligand cd40;ligand of cd40;ligand--cd40;ligand-cd40;t cell antigen gp39;T-…	SWISSPROT_AC:P29965;SWISSPROT_ID:CD40L_HUMAN;EMBL:BC071754;EMBL:BC074950;EMBL:D31797;EMBL:L07414;EMBL:X67878;EMBL:X68550;EMBL:Z15017;RefSeq:NP_000065.1;ProteinModelPortal:P29965;STRING:9606.ENSP00000359663;SMR:P29965;GeneID:959;KEGG:hsa:959;PIR:S28017;eggNOG:ENOG410IVYF;eggNOG:ENOG4111TET;UniGene:Hs.592244;GO:GO:0005174;GO:GO:0005615;GO:GO:0005622;GO:GO:0005886;GO:GO:0005887;GO:GO:0006954;GO:GO:0…
36463	C3 --> CO3	Expression	GeneID:718;		4340386	Gene	C3	AHUS5;ARMD9;ASP;C3;C3a;C3b;complement C3;CPAMD1;HEL-S-62p;c 3 complement;c-3 complement;c3 a;c3 alpha;c3 alpha-chain;C3 and PZP-like alpha-2-macroglobulin domain-containing protein 1;c3 b;c3 beta;c3 beta-chain;c3 chain a;c3 complement;c3--a;c3-beta;c3-complement;c3alpha;c3beta;chain-c3 alpha;CO3;complement c 3;complement c-3;complement-c3;	SWISSPROT_AC:P01024;SWISSPROT_ID:CO3_HUMAN;GeneID:718;Ensembl:ENSG00000125730;HGNC:HGNC:1318;MIM:120700;Vega:OTTHUMG00000150335;protein_accession:AAA35722.1;protein_accession:AAA85332.1;protein_accession:AAI50180.1;protein_accession:AAI50201.1;protein_accession:AAR89906.1;protein_accession:ACJ13656.1;protein_accession:BAG64978.1;protein_accession:CAI46844.1;protein_accession:EAW69070.1;protein_ac…	72159	Protein	CO3	C3;C3 and PZP-like alpha-2-macroglobulin domain-containing protein 1;CO3;Complement C3;CPAMD1;AHUS5;ARMD9;ASP;c 3 complement;c-3 complement;c3 a;c3 alpha;c3 alpha-chain;c3 b;c3 beta;c3 beta-chain;c3 chain a;c3 complement;c3--a;c3-beta;c3-complement;C3a;c3alpha;C3b;c3beta;chain-c3 alpha;complement c 3;complement c-3;complement-c3;HEL-S-62p;	SWISSPROT_AC:P01024;SWISSPROT_ID:CO3_HUMAN;EMBL:AY513239;EMBL:BC150179;EMBL:BC150200;EMBL:CH471139;EMBL:K02765;RefSeq:NP_000055.2;ProteinModelPortal:P01024;STRING:9606.ENSP00000245907;SWISSPROT_AC_OLD:A7E236;SMR:P01024;GeneID:718;KEGG:hsa:718;PIR:A94065;eggNOG:ENOG410XRED;eggNOG:KOG1366;UniGene:Hs.529053;GO:GO:0001798;GO:GO:0001934;GO:GO:0001970;GO:GO:0004252;GO:GO:0004866;GO:GO:0005102;GO:GO:000…
42831	CXCL10 --> IP-10	Expression	GeneID:3627;		4342770	Gene	CXCL10	C-X-C motif chemokine ligand 10;C7;crg-2;CXCL10;gIP-10;IFI10;INP10;IP-10;mob-1;SCYB10;10 kDa interferon gamma-induced protein;10-kda interferon gamma-induced protein;C-X-C motif chemokine 10;c-x-c motif ligand 10 chemokine;c-x-c-motif chemokine 10;chemokine c-x-c motif ligand 10;chemokine c-x-c-motif ligand 10;cxcl 10;cxcl-10;CXL10;gamma ip-10;gamma-ip-10;Gamma-IP10;gammaip-10;ip 10;ip- 10;ip--10…	SWISSPROT_AC:P02778;SWISSPROT_ID:CXL10_HUMAN;GeneID:3627;Ensembl:ENSG00000169245;HGNC:HGNC:10637;MIM:147310;Vega:OTTHUMG00000160887;protein_accession:AAH10954.1;protein_accession:ABM83712.1;protein_accession:ABM87032.1;protein_accession:CAA26370.1;protein_accession:EAX05772.1;protein_accession:EAX05773.1;protein_accession:NP_001556.2;protein_accession:P02778.2;protein_gi:119626177;protein_gi:1196…	86038	Protein	IP-10	10 kDa interferon gamma-induced protein;C-X-C motif chemokine 10;CXCL10;CXL10;Gamma-IP10;INP10;IP-10;SCYB10;Small-inducible cytokine B10;10-kda interferon gamma-induced protein;C-X-C motif chemokine ligand 10;c-x-c motif ligand 10 chemokine;c-x-c-motif chemokine 10;C7;chemokine c-x-c motif ligand 10;chemokine c-x-c-motif ligand 10;crg-2;cxcl 10;cxcl-10;gamma ip-10;gamma-ip-10;gammaip-10;gIP-10;IF…	SWISSPROT_AC:P02778;SWISSPROT_ID:CXL10_HUMAN;EMBL:BC010954;EMBL:X02530;RefSeq:NP_001556.2;ProteinModelPortal:P02778;STRING:9606.ENSP00000305651;SWISSPROT_AC_OLD:Q96QJ5;SMR:P02778;GeneID:3627;KEGG:hsa:3627;PIR:A03243;eggNOG:ENOG410J1VC;eggNOG:ENOG410ZTJK;UniGene:Hs.632586;GO:GO:0005102;GO:GO:0005576;GO:GO:0005615;GO:GO:0006935;GO:GO:0006954;GO:GO:0006955;GO:GO:0007165;GO:GO:0007166;GO:GO:0007186;G…
87081	IL13 --> IL-13	Expression	GeneID:3596;		4342745	Gene	IL13	IL-13;IL13;interleukin 13;P600;il -13;il 13;il- 13;il-1 3;il1-3;interleukin-1 3;Interleukin-13;interleukin13;nc 30;nc-30;NC30;p 600;p-600;	SWISSPROT_AC:P35225;SWISSPROT_ID:IL13_HUMAN;GeneID:3596;Ensembl:ENSG00000169194;HGNC:HGNC:5973;MIM:147683;Vega:OTTHUMG00000059723;protein_accession:AAA36107.1;protein_accession:AAA83738.1;protein_accession:AAB01681.1;protein_accession:AAC03535.1;protein_accession:AAH96138.1;protein_accession:AAH96139.1;protein_accession:AAH96140.1;protein_accession:AAH96141.2;protein_accession:AAK53823.1;protein_…	197279	Protein	IL-13	IL-13;IL13;Interleukin-13;NC30;il -13;il 13;il- 13;il-1 3;il1-3;interleukin 13;interleukin-1 3;interleukin13;nc 30;nc-30;p 600;p-600;P600;	SWISSPROT_AC:P35225;SWISSPROT_ID:IL13_HUMAN;EMBL:AC004039;EMBL:AF043334;EMBL:AF377331;EMBL:BC096139;EMBL:L06801;EMBL:U10307;EMBL:U31120;EMBL:X69079;RefSeq:NP_002179.2;ProteinModelPortal:P35225;STRING:9606.ENSP00000304915;SWISSPROT_AC_OLD:O43644;SWISSPROT_AC_OLD:Q4VB52;SWISSPROT_AC_OLD:Q9UDC7;SMR:P35225;GeneID:3596;KEGG:hsa:3596;PIR:I38060;eggNOG:ENOG410JCI3;eggNOG:ENOG4111BX2;UniGene:Hs.845;GO:GO…
87091	IL15 --> IL-15	Expression	GeneID:3600;		4342748	Gene	IL15	IL-15;IL15;interleukin 15;il -15;il 15;il i-v;il- 15;interleukin-1 5;Interleukin-15;interleukin15;	SWISSPROT_AC:P40933;SWISSPROT_ID:IL15_HUMAN;GeneID:3600;Ensembl:ENSG00000164136;HGNC:HGNC:5977;MIM:600554;Vega:OTTHUMG00000133418;protein_accession:AAA21551.1;protein_accession:AAB97518.1;protein_accession:AAD15004.1;protein_accession:AAH18149.1;protein_accession:AAI00962.1;protein_accession:AAI00963.1;protein_accession:AAI00964.1;protein_accession:AAU21241.1;protein_accession:ABM84635.1;protein_…	197294	Protein	IL-15	IL-15;IL15;Interleukin-15;il -15;il 15;il i-v;il- 15;interleukin 15;interleukin-1 5;interleukin15;	SWISSPROT_AC:P40933;SWISSPROT_ID:IL15_HUMAN;EMBL:AF031167;EMBL:AK122993;EMBL:AK290619;EMBL:AY720442;EMBL:BC018149;EMBL:BC100961;EMBL:BC100962;EMBL:BC100963;EMBL:CH471056;EMBL:CR541980;EMBL:CR542007;EMBL:U14407;EMBL:X91233;EMBL:X94222;EMBL:X94223;EMBL:Y09908;EMBL:Z38000;RefSeq:NP_000576.1;RefSeq:NP_751915.1;ProteinModelPortal:P40933;STRING:9606.ENSP00000296545;SWISSPROT_AC_OLD:D3DNZ2;SWISSPROT_AC_…
87132	IL1A --> IL-1 alpha	Expression	GeneID:3552;		4342708	Gene	IL1A	IL-1A;IL1;IL1-ALPHA;IL1A;IL1F1;interleukin 1 alpha;Hematopoietin-1;il -1alpha;il 1 a;il 1 alpha;il 1-alpha;il 1a;il 1alpha;il- 1 alpha;il- 1alpha;il-1 a;IL-1 alpha;il-1-a;il-1-alpha;il-i alpha;il-i-alpha;il-ialpha;il1 a;il1 alpha;il1-a;il1alpha;interleukin -1 alpha;interleukin -1alpha;interleukin 1-a;interleukin 1-alpha;interleukin 1a;interleukin 1alpha;interleukin i alpha;interleukin- 1 alpha;in…	SWISSPROT_AC:P01583;SWISSPROT_ID:IL1A_HUMAN;GeneID:3552;Ensembl:ENSG00000115008;HGNC:HGNC:5991;MIM:147760;Vega:OTTHUMG00000131315;protein_accession:AAA59133.1;protein_accession:AAH13142.1;protein_accession:AAM96189.1;protein_accession:AAP35660.1;protein_accession:AAX93054.1;protein_accession:ABM81601.1;protein_accession:ABM84782.1;protein_accession:BAG37367.1;protein_accession:CAA26371.1;protein_…	197367	Protein	IL-1 alpha	Hematopoietin-1;IL-1 alpha;IL1A;IL1F1;Interleukin-1 alpha;il -1alpha;il 1 a;il 1 alpha;il 1-alpha;il 1a;il 1alpha;il- 1 alpha;il- 1alpha;il-1 a;il-1-a;il-1-alpha;IL-1A;il-i alpha;il-i-alpha;il-ialpha;IL1;il1 a;il1 alpha;il1-a;IL1-ALPHA;il1alpha;interleukin -1 alpha;interleukin -1alpha;interleukin 1 alpha;interleukin 1-a;interleukin 1-alpha;interleukin 1a;interleukin 1alpha;interleukin i alpha;int…	SWISSPROT_AC:P01583;SWISSPROT_ID:IL1A_HUMAN;EMBL:AC112235;EMBL:AF536338;EMBL:AK314850;EMBL:BC013142;EMBL:BN000002;EMBL:BT007014;EMBL:CH471217;EMBL:CR457414;EMBL:M15329;EMBL:M28983;EMBL:X02531;EMBL:X02851;EMBL:X03833;EMBL:X56086;RefSeq:NP_000566.3;ProteinModelPortal:P01583;STRING:9606.ENSP00000263339;SWISSPROT_AC_OLD:Q53QF9;SWISSPROT_AC_OLD:Q7RU02;SMR:P01583;GeneID:3552;KEGG:hsa:3552;PIR:A23385;eg…
191002	STAT3 --> STAT3	Expression	GeneID:6774;		4345290	Gene	STAT3	ADMIO;ADMIO1;APRF;HIES;signal transducer and activator of transcription 3;STAT3;acute phase response factor;Acute-phase response factor;acute-phase response of factor;stat 3;stat-3;	SWISSPROT_AC:P40763;SWISSPROT_ID:STAT3_HUMAN;GeneID:6774;Ensembl:ENSG00000168610;HGNC:HGNC:11364;MIM:102582;Vega:OTTHUMG00000150645;protein_accession:AAA58374.1;protein_accession:AAB84254.1;protein_accession:AAH00627.1;protein_accession:AAH14482.1;protein_accession:AAK17196.1;protein_accession:AAS66986.1;protein_accession:ABZ92186.1;protein_accession:ACE86450.1;protein_accession:ACE87126.1;protei…	461696	Protein	STAT3	Acute-phase response factor;APRF;Signal transducer and activator of transcription 3;STAT3;acute phase response factor;acute-phase response of factor;ADMIO;ADMIO1;HIES;stat 3;stat-3;	SWISSPROT_AC:P40763;SWISSPROT_ID:STAT3_HUMAN;EMBL:AC087691;EMBL:AF029311;EMBL:AJ012463;EMBL:AK291933;EMBL:AY572796;EMBL:BC000627;EMBL:BC014482;EMBL:CH471152;EMBL:JB252046;EMBL:L29277;RefSeq:NP_003141.2;RefSeq:NP_644805.1;RefSeq:NP_998827.1;RefSeq:XP_005257673.2;RefSeq:XP_005257674.2;RefSeq:XP_011523447.1;RefSeq:XP_011523448.1;RefSeq:XP_016880461.1;RefSeq:XP_016880464.1;ProteinModelPortal:P40763;S…
202838	TLR2 --> TLR2	Expression	GeneID:7097;		4345575	Gene	TLR2	CD282;TIL4;TLR2;toll like receptor 2;CD282 antigen;receptor 2-toll-like;toll like receptor ii;toll like receptor-2;toll-like receptor -2;Toll-like receptor 2;toll-like receptor type 2;toll-like receptor-2;toll-like receptor2;toll-like-receptor 2;toll-like-receptor-2;toll-like-receptor2;Toll/interleukin-1 receptor-like protein 4;	SWISSPROT_AC:O60603;SWISSPROT_ID:TLR2_HUMAN;GeneID:7097;Ensembl:ENSG00000137462;HGNC:HGNC:11848;MIM:603028;Vega:OTTHUMG00000161525;protein_accession:AAC34133.1;protein_accession:AAC34377.1;protein_accession:AAH33756.1;protein_accession:AAM23001.1;protein_accession:AAY85644.1;protein_accession:AAY85645.1;protein_accession:AAY85646.1;protein_accession:AAY85647.1;protein_accession:AAY85648.1;protein…	490593	Protein	TLR2	CD282 antigen;TIL4;TLR2;Toll-like receptor 2;Toll/interleukin-1 receptor-like protein 4;CD282;receptor 2-toll-like;toll like receptor 2;toll like receptor ii;toll like receptor-2;toll-like receptor -2;toll-like receptor type 2;toll-like receptor-2;toll-like receptor2;toll-like-receptor 2;toll-like-receptor-2;toll-like-receptor2;	SWISSPROT_AC:O60603;SWISSPROT_ID:TLR2_HUMAN;EMBL:AB445624;EMBL:AF051152;EMBL:AF502291;EMBL:BC033756;EMBL:CH471056;EMBL:DQ012265;EMBL:DQ012266;EMBL:DQ012267;EMBL:DQ012268;EMBL:DQ012269;EMBL:DQ012270;EMBL:DQ012271;EMBL:U88878;RefSeq:NP_001305716.1;RefSeq:NP_001305718.1;RefSeq:NP_001305719.1;RefSeq:NP_001305720.1;RefSeq:NP_001305722.1;RefSeq:NP_001305724.1;RefSeq:NP_001305725.1;RefSeq:NP_003255.2;Re…
204222	FAS --> FAS1	Expression	GeneID:355;		4340096	Gene	FAS	ALPS1A;APO-1;APT1;CD95;FAS;Fas cell surface death receptor;FAS1;FASTM;TNFRSF6;antigen cd95;apo -i;apo 1;apo i;Apo-1 antigen;apo-1-antigen;apo-i;apo-isoform i;Apoptosis-mediating surface antigen FAS;cd 95;cd-95;cd9 5;CD95 antigen;cd95-antigen;cd95-type;cell death surface receptor fas;cell surface death receptor fas;cell surface fas death receptor;cell's surface death receptor fas;cell-surface deat…	SWISSPROT_AC:P25445;SWISSPROT_ID:TNR6_HUMAN;GeneID:355;Ensembl:ENSG00000026103;HGNC:HGNC:11920;MIM:134637;Vega:OTTHUMG00000018701;protein_accession:AAA63174.1;protein_accession:AAC16236.1;protein_accession:AAC16237.1;protein_accession:AAD14292.1;protein_accession:AAH12479.1;protein_accession:AAR08906.1;protein_accession:AAS76663.1;protein_accession:ABM85601.1;protein_accession:ACC91884.1;protein_…	492563	Protein	FAS1	Apo-1 antigen;Apoptosis-mediating surface antigen FAS;APT1;CD95 antigen;FAS;FAS1;FASLG receptor;TNFRSF6;TNR6;Tumor necrosis factor receptor superfamily member 6;ALPS1A;antigen cd95;apo -i;apo 1;apo i;APO-1;apo-1-antigen;apo-i;apo-isoform i;cd 95;cd-95;cd9 5;CD95;cd95-antigen;cd95-type;cell death surface receptor fas;cell surface death receptor fas;cell surface fas death receptor;cell's surface de…	SWISSPROT_AC:P25445;SWISSPROT_ID:TNR6_HUMAN;EMBL:AK290978;EMBL:AL157394;EMBL:AY450925;EMBL:AY495076;EMBL:BC012479;EMBL:CH471066;EMBL:FM246458;EMBL:M67454;EMBL:X63717;EMBL:X83490;EMBL:X83491;EMBL:X83492;EMBL:X83493;EMBL:X89101;EMBL:Z47993;EMBL:Z47994;EMBL:Z47995;EMBL:Z66556;EMBL:Z70519;EMBL:Z70520;RefSeq:NP_000034.1;RefSeq:NP_001307548.1;RefSeq:NP_690610.1;RefSeq:NP_690611.1;ProteinModelPortal:P25…
510771	IL1A -- IL-1 alpha	association	Pubmed 2007:17214636;Pubmed 2000:11145356;	The C/T polymorphism at position -889 of the <b>IL1A</b> gene influences <b>interleukin-1alpha</b> expression, with the T allele inducing higher expression.[Pubmed 2007:17214636];Polymorphisms in the <b>IL-1A</b> gene are correlated with levels of <b>interleukin-1alpha</b> protein in gingival crevicular fluid of teeth with severe periodontal disease.[Pubmed 2000:11145356];	4342708	Gene	IL1A	IL-1A;IL1;IL1-ALPHA;IL1A;IL1F1;interleukin 1 alpha;Hematopoietin-1;il -1alpha;il 1 a;il 1 alpha;il 1-alpha;il 1a;il 1alpha;il- 1 alpha;il- 1alpha;il-1 a;IL-1 alpha;il-1-a;il-1-alpha;il-i alpha;il-i-alpha;il-ialpha;il1 a;il1 alpha;il1-a;il1alpha;interleukin -1 alpha;interleukin -1alpha;interleukin 1-a;interleukin 1-alpha;interleukin 1a;interleukin 1alpha;interleukin i alpha;interleukin- 1 alpha;in…	SWISSPROT_AC:P01583;SWISSPROT_ID:IL1A_HUMAN;GeneID:3552;Ensembl:ENSG00000115008;HGNC:HGNC:5991;MIM:147760;Vega:OTTHUMG00000131315;protein_accession:AAA59133.1;protein_accession:AAH13142.1;protein_accession:AAM96189.1;protein_accession:AAP35660.1;protein_accession:AAX93054.1;protein_accession:ABM81601.1;protein_accession:ABM84782.1;protein_accession:BAG37367.1;protein_accession:CAA26371.1;protein_…	197367	Protein	IL-1 alpha	Hematopoietin-1;IL-1 alpha;IL1A;IL1F1;Interleukin-1 alpha;il -1alpha;il 1 a;il 1 alpha;il 1-alpha;il 1a;il 1alpha;il- 1 alpha;il- 1alpha;il-1 a;il-1-a;il-1-alpha;IL-1A;il-i alpha;il-i-alpha;il-ialpha;IL1;il1 a;il1 alpha;il1-a;IL1-ALPHA;il1alpha;interleukin -1 alpha;interleukin -1alpha;interleukin 1 alpha;interleukin 1-a;interleukin 1-alpha;interleukin 1a;interleukin 1alpha;interleukin i alpha;int…	SWISSPROT_AC:P01583;SWISSPROT_ID:IL1A_HUMAN;EMBL:AC112235;EMBL:AF536338;EMBL:AK314850;EMBL:BC013142;EMBL:BN000002;EMBL:BT007014;EMBL:CH471217;EMBL:CR457414;EMBL:M15329;EMBL:M28983;EMBL:X02531;EMBL:X02851;EMBL:X03833;EMBL:X56086;RefSeq:NP_000566.3;ProteinModelPortal:P01583;STRING:9606.ENSP00000263339;SWISSPROT_AC_OLD:Q53QF9;SWISSPROT_AC_OLD:Q7RU02;SMR:P01583;GeneID:3552;KEGG:hsa:3552;PIR:A23385;eg…
526845	APP -- APP	association	Pubmed:9562461;Pubmed 2001:11141490;Pubmed 2001:11403971;Pubmed 2004:14982851;Pubmed 2004:15128703;Pubmed 2004:15186505;Pubmed 2002:12218659;Pubmed 2012:22573143;Pubmed 2008:18038275;Pubmed 2008:18072760;Pubmed 2008:18539594;Pubmed 2008:18827923;Pubmed 2007:17511655;Pubmed 2007:17877641;Pubmed 2007:17913923;Pubmed 2000:10708675;Pubmed 2014:25056661;Pubmed 2010:20237263;Pubmed 2009:19352431;Pubmed…	To examine the influence of mutant PS1 on Abeta formation and deposition in brain, we mated mice expressing wild-type and mutant PS1 to mice expressing a murine <b>amyloid precursor protein</b> (APP) with a humanized <b>Abeta</b> domain and missense mutations linked to a Swedish familial Alzheimer's disease kindred (APP.swe).[Pubmed:9562461];Thus, hAPP and endogenous BACE expression in similar an…	4340093	Gene	APP	AAA;ABETA;ABPP;AD1;amyloid beta precursor protein;APP;APPI;CTFgamma;CVAP;PN-II;PN2;A4;aaa-type;Alzheimer disease amyloid protein;alzheimer's disease amyloid protein;amyloid b precursor protein;amyloid b protein precursor;amyloid b-protein precursor;Amyloid beta A4 protein;amyloid beta protein a4;amyloid beta- protein precursor;amyloid beta-a4 protein;amyloid beta-protein precursor;Amyloid precurs…	SWISSPROT_AC:P05067;SWISSPROT_ID:A4_HUMAN;GeneID:351;Ensembl:ENSG00000142192;HGNC:HGNC:620;MIM:104760;Vega:OTTHUMG00000078438;protein_accession:AAA35540.1;protein_accession:AAA51564.1;protein_accession:AAA51722.1;protein_accession:AAA51726.1;protein_accession:AAA51727.1;protein_accession:AAA51768.1;protein_accession:AAA58727.1;protein_accession:AAA60163.1;protein_accession:AAB19991.1;protein_acce…	3186	Protein	APP	A4;ABPP;AD1;Alzheimer disease amyloid protein;Amyloid beta A4 protein;Amyloid precursor protein;APP;APPI;Beta-amyloid precursor protein;Cerebral vascular amyloid peptide;CVAP;PN-II;PreA4;Protease nexin-II;AAA;aaa-type;ABETA;alzheimer's disease amyloid protein;amyloid b precursor protein;amyloid b protein precursor;amyloid b-protein precursor;amyloid beta precursor protein;amyloid beta protein a4;…	SWISSPROT_AC:P05067;SWISSPROT_ID:A4_HUMAN;EMBL:AB066441;EMBL:AF282245;EMBL:AK295621;EMBL:AK312326;EMBL:AP001439;EMBL:AP001440;EMBL:AP001441;EMBL:AP001442;EMBL:AP001443;EMBL:AY919674;EMBL:BC004369;EMBL:BC065529;EMBL:CH471079;EMBL:D87675;EMBL:M15532;EMBL:M15533;EMBL:M16765;EMBL:M18734;EMBL:M24546;EMBL:M24547;EMBL:M28373;EMBL:M29269;EMBL:M29270;EMBL:M33112;EMBL:M34862;EMBL:M34863;EMBL:M34864;EMBL:M3…
963722	CO3 -- CD40L	association	Pubmed 1991:16839921;	In addition there was an increase in the plasma concentrations of prealbumin, haptoglobin and <b>complement C3</b> together with a rise in the concentrations of the circulating immunoglobulins <b>IgM</b> and IgA.[Pubmed 1991:16839921];	72159	Protein	CO3	C3;C3 and PZP-like alpha-2-macroglobulin domain-containing protein 1;CO3;Complement C3;CPAMD1;AHUS5;ARMD9;ASP;c 3 complement;c-3 complement;c3 a;c3 alpha;c3 alpha-chain;c3 b;c3 beta;c3 beta-chain;c3 chain a;c3 complement;c3--a;c3-beta;c3-complement;C3a;c3alpha;C3b;c3beta;chain-c3 alpha;complement c 3;complement c-3;complement-c3;HEL-S-62p;	SWISSPROT_AC:P01024;SWISSPROT_ID:CO3_HUMAN;EMBL:AY513239;EMBL:BC150179;EMBL:BC150200;EMBL:CH471139;EMBL:K02765;RefSeq:NP_000055.2;ProteinModelPortal:P01024;STRING:9606.ENSP00000245907;SWISSPROT_AC_OLD:A7E236;SMR:P01024;GeneID:718;KEGG:hsa:718;PIR:A94065;eggNOG:ENOG410XRED;eggNOG:KOG1366;UniGene:Hs.529053;GO:GO:0001798;GO:GO:0001934;GO:GO:0001970;GO:GO:0004252;GO:GO:0004866;GO:GO:0005102;GO:GO:000…	59248	Protein	CD40L	CD154 antigen;CD40 ligand;CD40-L;CD40L;CD40LG;T-cell antigen Gp39;TNF-related activation protein;TNFSF5;TRAP;Tumor necrosis factor ligand superfamily member 5;cd 154;cd 40 l;cd 40 ligand;cd-40 ligand;cd-40-ligand;CD154;cd40 l;cd40 ligand--an;cd40-ligand;cd40l g;cd40l--an;gp39;hCD40L;higm type 1;higm-1;HIGM1;IGM;IMD3;l-cd40;ligand cd40;ligand of cd40;ligand--cd40;ligand-cd40;t cell antigen gp39;T-…	SWISSPROT_AC:P29965;SWISSPROT_ID:CD40L_HUMAN;EMBL:BC071754;EMBL:BC074950;EMBL:D31797;EMBL:L07414;EMBL:X67878;EMBL:X68550;EMBL:Z15017;RefSeq:NP_000065.1;ProteinModelPortal:P29965;STRING:9606.ENSP00000359663;SMR:P29965;GeneID:959;KEGG:hsa:959;PIR:S28017;eggNOG:ENOG410IVYF;eggNOG:ENOG4111TET;UniGene:Hs.592244;GO:GO:0005174;GO:GO:0005615;GO:GO:0005622;GO:GO:0005886;GO:GO:0005887;GO:GO:0006954;GO:GO:0…
1440703	IL-1 alpha -- CD40L	association	Pubmed 1993:8142596;	We found that <b>IL-1 alpha</b> was as potent in inducing <b>IgM</b> expression in 70Z/3 cells as it was in inducing IL-2 secretion in EL-4 6.1 C10 cells.[Pubmed 1993:8142596];	197367	Protein	IL-1 alpha	Hematopoietin-1;IL-1 alpha;IL1A;IL1F1;Interleukin-1 alpha;il -1alpha;il 1 a;il 1 alpha;il 1-alpha;il 1a;il 1alpha;il- 1 alpha;il- 1alpha;il-1 a;il-1-a;il-1-alpha;IL-1A;il-i alpha;il-i-alpha;il-ialpha;IL1;il1 a;il1 alpha;il1-a;IL1-ALPHA;il1alpha;interleukin -1 alpha;interleukin -1alpha;interleukin 1 alpha;interleukin 1-a;interleukin 1-alpha;interleukin 1a;interleukin 1alpha;interleukin i alpha;int…	SWISSPROT_AC:P01583;SWISSPROT_ID:IL1A_HUMAN;EMBL:AC112235;EMBL:AF536338;EMBL:AK314850;EMBL:BC013142;EMBL:BN000002;EMBL:BT007014;EMBL:CH471217;EMBL:CR457414;EMBL:M15329;EMBL:M28983;EMBL:X02531;EMBL:X02851;EMBL:X03833;EMBL:X56086;RefSeq:NP_000566.3;ProteinModelPortal:P01583;STRING:9606.ENSP00000263339;SWISSPROT_AC_OLD:Q53QF9;SWISSPROT_AC_OLD:Q7RU02;SMR:P01583;GeneID:3552;KEGG:hsa:3552;PIR:A23385;eg…	59248	Protein	CD40L	CD154 antigen;CD40 ligand;CD40-L;CD40L;CD40LG;T-cell antigen Gp39;TNF-related activation protein;TNFSF5;TRAP;Tumor necrosis factor ligand superfamily member 5;cd 154;cd 40 l;cd 40 ligand;cd-40 ligand;cd-40-ligand;CD154;cd40 l;cd40 ligand--an;cd40-ligand;cd40l g;cd40l--an;gp39;hCD40L;higm type 1;higm-1;HIGM1;IGM;IMD3;l-cd40;ligand cd40;ligand of cd40;ligand--cd40;ligand-cd40;t cell antigen gp39;T-…	SWISSPROT_AC:P29965;SWISSPROT_ID:CD40L_HUMAN;EMBL:BC071754;EMBL:BC074950;EMBL:D31797;EMBL:L07414;EMBL:X67878;EMBL:X68550;EMBL:Z15017;RefSeq:NP_000065.1;ProteinModelPortal:P29965;STRING:9606.ENSP00000359663;SMR:P29965;GeneID:959;KEGG:hsa:959;PIR:S28017;eggNOG:ENOG410IVYF;eggNOG:ENOG4111TET;UniGene:Hs.592244;GO:GO:0005174;GO:GO:0005615;GO:GO:0005622;GO:GO:0005886;GO:GO:0005887;GO:GO:0006954;GO:GO:0…
1758369	IL-1 alpha -- APP	association	Pubmed 2006:16724341;Pubmed 1995:8564570;	Concomitantly, the level of <b>sAPPalpha</b> was significantly increased by <b>IL-1alpha</b> in 48 hr;[Pubmed 2006:16724341];Our data show a complex mechanism of <b>sAPPalpha</b> regulation by <b>IL-1alpha</b> that involves ADAM-10, ADAM-17 and p38 MAPK upstream of MEK and PI3K.[Pubmed 2006:16724341];<b>IL1</b> and TNF alpha mediated stimulation of type 1 <b>APP</b> genes is synergistically enhan…	197367	Protein	IL-1 alpha	Hematopoietin-1;IL-1 alpha;IL1A;IL1F1;Interleukin-1 alpha;il -1alpha;il 1 a;il 1 alpha;il 1-alpha;il 1a;il 1alpha;il- 1 alpha;il- 1alpha;il-1 a;il-1-a;il-1-alpha;IL-1A;il-i alpha;il-i-alpha;il-ialpha;IL1;il1 a;il1 alpha;il1-a;IL1-ALPHA;il1alpha;interleukin -1 alpha;interleukin -1alpha;interleukin 1 alpha;interleukin 1-a;interleukin 1-alpha;interleukin 1a;interleukin 1alpha;interleukin i alpha;int…	SWISSPROT_AC:P01583;SWISSPROT_ID:IL1A_HUMAN;EMBL:AC112235;EMBL:AF536338;EMBL:AK314850;EMBL:BC013142;EMBL:BN000002;EMBL:BT007014;EMBL:CH471217;EMBL:CR457414;EMBL:M15329;EMBL:M28983;EMBL:X02531;EMBL:X02851;EMBL:X03833;EMBL:X56086;RefSeq:NP_000566.3;ProteinModelPortal:P01583;STRING:9606.ENSP00000263339;SWISSPROT_AC_OLD:Q53QF9;SWISSPROT_AC_OLD:Q7RU02;SMR:P01583;GeneID:3552;KEGG:hsa:3552;PIR:A23385;eg…	3186	Protein	APP	A4;ABPP;AD1;Alzheimer disease amyloid protein;Amyloid beta A4 protein;Amyloid precursor protein;APP;APPI;Beta-amyloid precursor protein;Cerebral vascular amyloid peptide;CVAP;PN-II;PreA4;Protease nexin-II;AAA;aaa-type;ABETA;alzheimer's disease amyloid protein;amyloid b precursor protein;amyloid b protein precursor;amyloid b-protein precursor;amyloid beta precursor protein;amyloid beta protein a4;…	SWISSPROT_AC:P05067;SWISSPROT_ID:A4_HUMAN;EMBL:AB066441;EMBL:AF282245;EMBL:AK295621;EMBL:AK312326;EMBL:AP001439;EMBL:AP001440;EMBL:AP001441;EMBL:AP001442;EMBL:AP001443;EMBL:AY919674;EMBL:BC004369;EMBL:BC065529;EMBL:CH471079;EMBL:D87675;EMBL:M15532;EMBL:M15533;EMBL:M16765;EMBL:M18734;EMBL:M24546;EMBL:M24547;EMBL:M28373;EMBL:M29269;EMBL:M29270;EMBL:M33112;EMBL:M34862;EMBL:M34863;EMBL:M34864;EMBL:M3…
2199040	IL-1 alpha -- IL-13	association	Pubmed 1996:8886420;Pubmed 1998:9644628;	<b>IL-13</b> was found to up-regulate significantly (P &lt; 0.01) the <b>IL-1 alpha</b> but not the TNF-alpha-induced IL-8 generation by HT-29 cells.[Pubmed 1996:8886420];IL-4 or <b>IL-13</b> in combination with <b>IL-1 alpha</b> + IFN-gamma or IFN-gamma + TNF-alpha resulted in a two- to fourfold augmentation of RANTES production, ranging from 2.2 +/- 0.2 to 35 +/- 2 ng/ml in different cell lines…	197367	Protein	IL-1 alpha	Hematopoietin-1;IL-1 alpha;IL1A;IL1F1;Interleukin-1 alpha;il -1alpha;il 1 a;il 1 alpha;il 1-alpha;il 1a;il 1alpha;il- 1 alpha;il- 1alpha;il-1 a;il-1-a;il-1-alpha;IL-1A;il-i alpha;il-i-alpha;il-ialpha;IL1;il1 a;il1 alpha;il1-a;IL1-ALPHA;il1alpha;interleukin -1 alpha;interleukin -1alpha;interleukin 1 alpha;interleukin 1-a;interleukin 1-alpha;interleukin 1a;interleukin 1alpha;interleukin i alpha;int…	SWISSPROT_AC:P01583;SWISSPROT_ID:IL1A_HUMAN;EMBL:AC112235;EMBL:AF536338;EMBL:AK314850;EMBL:BC013142;EMBL:BN000002;EMBL:BT007014;EMBL:CH471217;EMBL:CR457414;EMBL:M15329;EMBL:M28983;EMBL:X02531;EMBL:X02851;EMBL:X03833;EMBL:X56086;RefSeq:NP_000566.3;ProteinModelPortal:P01583;STRING:9606.ENSP00000263339;SWISSPROT_AC_OLD:Q53QF9;SWISSPROT_AC_OLD:Q7RU02;SMR:P01583;GeneID:3552;KEGG:hsa:3552;PIR:A23385;eg…	197279	Protein	IL-13	IL-13;IL13;Interleukin-13;NC30;il -13;il 13;il- 13;il-1 3;il1-3;interleukin 13;interleukin-1 3;interleukin13;nc 30;nc-30;p 600;p-600;P600;	SWISSPROT_AC:P35225;SWISSPROT_ID:IL13_HUMAN;EMBL:AC004039;EMBL:AF043334;EMBL:AF377331;EMBL:BC096139;EMBL:L06801;EMBL:U10307;EMBL:U31120;EMBL:X69079;RefSeq:NP_002179.2;ProteinModelPortal:P35225;STRING:9606.ENSP00000304915;SWISSPROT_AC_OLD:O43644;SWISSPROT_AC_OLD:Q4VB52;SWISSPROT_AC_OLD:Q9UDC7;SMR:P35225;GeneID:3596;KEGG:hsa:3596;PIR:I38060;eggNOG:ENOG410JCI3;eggNOG:ENOG4111BX2;UniGene:Hs.845;GO:GO…
2213229	FAS1 -- CD40L	association	Pubmed 2004:14978025;Pubmed 1996:8871610;Pubmed 2009:19404646;	Natural IgM-induced apoptosis was inhibited by soluble Fas molecules and affinity-purified <b>Fas</b> antibodies from pooled <b>IgM</b> preparation induced apoptosis in lymphoblastoid cells, suggesting the involvement of the Fas receptor.[Pubmed 2004:14978025];It has been shown that <b>CD40L</b> can induce both <b>Fas</b> expression and susceptibility to Fas-mediated killing in B cells, while ant…	492563	Protein	FAS1	Apo-1 antigen;Apoptosis-mediating surface antigen FAS;APT1;CD95 antigen;FAS;FAS1;FASLG receptor;TNFRSF6;TNR6;Tumor necrosis factor receptor superfamily member 6;ALPS1A;antigen cd95;apo -i;apo 1;apo i;APO-1;apo-1-antigen;apo-i;apo-isoform i;cd 95;cd-95;cd9 5;CD95;cd95-antigen;cd95-type;cell death surface receptor fas;cell surface death receptor fas;cell surface fas death receptor;cell's surface de…	SWISSPROT_AC:P25445;SWISSPROT_ID:TNR6_HUMAN;EMBL:AK290978;EMBL:AL157394;EMBL:AY450925;EMBL:AY495076;EMBL:BC012479;EMBL:CH471066;EMBL:FM246458;EMBL:M67454;EMBL:X63717;EMBL:X83490;EMBL:X83491;EMBL:X83492;EMBL:X83493;EMBL:X89101;EMBL:Z47993;EMBL:Z47994;EMBL:Z47995;EMBL:Z66556;EMBL:Z70519;EMBL:Z70520;RefSeq:NP_000034.1;RefSeq:NP_001307548.1;RefSeq:NP_690610.1;RefSeq:NP_690611.1;ProteinModelPortal:P25…	59248	Protein	CD40L	CD154 antigen;CD40 ligand;CD40-L;CD40L;CD40LG;T-cell antigen Gp39;TNF-related activation protein;TNFSF5;TRAP;Tumor necrosis factor ligand superfamily member 5;cd 154;cd 40 l;cd 40 ligand;cd-40 ligand;cd-40-ligand;CD154;cd40 l;cd40 ligand--an;cd40-ligand;cd40l g;cd40l--an;gp39;hCD40L;higm type 1;higm-1;HIGM1;IGM;IMD3;l-cd40;ligand cd40;ligand of cd40;ligand--cd40;ligand-cd40;t cell antigen gp39;T-…	SWISSPROT_AC:P29965;SWISSPROT_ID:CD40L_HUMAN;EMBL:BC071754;EMBL:BC074950;EMBL:D31797;EMBL:L07414;EMBL:X67878;EMBL:X68550;EMBL:Z15017;RefSeq:NP_000065.1;ProteinModelPortal:P29965;STRING:9606.ENSP00000359663;SMR:P29965;GeneID:959;KEGG:hsa:959;PIR:S28017;eggNOG:ENOG410IVYF;eggNOG:ENOG4111TET;UniGene:Hs.592244;GO:GO:0005174;GO:GO:0005615;GO:GO:0005622;GO:GO:0005886;GO:GO:0005887;GO:GO:0006954;GO:GO:0…
2403045	IL-13 -- CD40L	association	Pubmed 2014:25343623;Pubmed 1999:9886372;Pubmed 1997:9192766;	Intriguingly, maximum TNF-Î±, IL-6 and <b>IL-13</b> with low anti-CHIKV <b>IgM</b> response found in subjects recovered from CHIKV within one month of illness.[Pubmed 2014:25343623];Intriguingly, maximum TNF-ÃÂ±, IL-6 and <b>IL-13</b> with low anti-CHIKV <b>IgM</b> response found in subjects recovered from CHIKV within one month of illness.[Pubmed 2014:25343623];Intriguingly, maximum TNF-?, IL-6…	197279	Protein	IL-13	IL-13;IL13;Interleukin-13;NC30;il -13;il 13;il- 13;il-1 3;il1-3;interleukin 13;interleukin-1 3;interleukin13;nc 30;nc-30;p 600;p-600;P600;	SWISSPROT_AC:P35225;SWISSPROT_ID:IL13_HUMAN;EMBL:AC004039;EMBL:AF043334;EMBL:AF377331;EMBL:BC096139;EMBL:L06801;EMBL:U10307;EMBL:U31120;EMBL:X69079;RefSeq:NP_002179.2;ProteinModelPortal:P35225;STRING:9606.ENSP00000304915;SWISSPROT_AC_OLD:O43644;SWISSPROT_AC_OLD:Q4VB52;SWISSPROT_AC_OLD:Q9UDC7;SMR:P35225;GeneID:3596;KEGG:hsa:3596;PIR:I38060;eggNOG:ENOG410JCI3;eggNOG:ENOG4111BX2;UniGene:Hs.845;GO:GO…	59248	Protein	CD40L	CD154 antigen;CD40 ligand;CD40-L;CD40L;CD40LG;T-cell antigen Gp39;TNF-related activation protein;TNFSF5;TRAP;Tumor necrosis factor ligand superfamily member 5;cd 154;cd 40 l;cd 40 ligand;cd-40 ligand;cd-40-ligand;CD154;cd40 l;cd40 ligand--an;cd40-ligand;cd40l g;cd40l--an;gp39;hCD40L;higm type 1;higm-1;HIGM1;IGM;IMD3;l-cd40;ligand cd40;ligand of cd40;ligand--cd40;ligand-cd40;t cell antigen gp39;T-…	SWISSPROT_AC:P29965;SWISSPROT_ID:CD40L_HUMAN;EMBL:BC071754;EMBL:BC074950;EMBL:D31797;EMBL:L07414;EMBL:X67878;EMBL:X68550;EMBL:Z15017;RefSeq:NP_000065.1;ProteinModelPortal:P29965;STRING:9606.ENSP00000359663;SMR:P29965;GeneID:959;KEGG:hsa:959;PIR:S28017;eggNOG:ENOG410IVYF;eggNOG:ENOG4111TET;UniGene:Hs.592244;GO:GO:0005174;GO:GO:0005615;GO:GO:0005622;GO:GO:0005886;GO:GO:0005887;GO:GO:0006954;GO:GO:0…
3179239	FAS1 -- IL-15	association	Pubmed 2000:10731928;	5) Fas expression was increased in HIV patients (70.2 +/- 4.6%) compared to HIV (-) donors (32.4 +/- 4.3%), and <b>IL-15</b> increased <b>Fas</b> expression by 8.4 +/- 1.2% in HIV (-) donors.[Pubmed 2000:10731928];	492563	Protein	FAS1	Apo-1 antigen;Apoptosis-mediating surface antigen FAS;APT1;CD95 antigen;FAS;FAS1;FASLG receptor;TNFRSF6;TNR6;Tumor necrosis factor receptor superfamily member 6;ALPS1A;antigen cd95;apo -i;apo 1;apo i;APO-1;apo-1-antigen;apo-i;apo-isoform i;cd 95;cd-95;cd9 5;CD95;cd95-antigen;cd95-type;cell death surface receptor fas;cell surface death receptor fas;cell surface fas death receptor;cell's surface de…	SWISSPROT_AC:P25445;SWISSPROT_ID:TNR6_HUMAN;EMBL:AK290978;EMBL:AL157394;EMBL:AY450925;EMBL:AY495076;EMBL:BC012479;EMBL:CH471066;EMBL:FM246458;EMBL:M67454;EMBL:X63717;EMBL:X83490;EMBL:X83491;EMBL:X83492;EMBL:X83493;EMBL:X89101;EMBL:Z47993;EMBL:Z47994;EMBL:Z47995;EMBL:Z66556;EMBL:Z70519;EMBL:Z70520;RefSeq:NP_000034.1;RefSeq:NP_001307548.1;RefSeq:NP_690610.1;RefSeq:NP_690611.1;ProteinModelPortal:P25…	197294	Protein	IL-15	IL-15;IL15;Interleukin-15;il -15;il 15;il i-v;il- 15;interleukin 15;interleukin-1 5;interleukin15;	SWISSPROT_AC:P40933;SWISSPROT_ID:IL15_HUMAN;EMBL:AF031167;EMBL:AK122993;EMBL:AK290619;EMBL:AY720442;EMBL:BC018149;EMBL:BC100961;EMBL:BC100962;EMBL:BC100963;EMBL:CH471056;EMBL:CR541980;EMBL:CR542007;EMBL:U14407;EMBL:X91233;EMBL:X94222;EMBL:X94223;EMBL:Y09908;EMBL:Z38000;RefSeq:NP_000576.1;RefSeq:NP_751915.1;ProteinModelPortal:P40933;STRING:9606.ENSP00000296545;SWISSPROT_AC_OLD:D3DNZ2;SWISSPROT_AC_…
3279091	IL-15 -- CD40L	association	Pubmed 2012:21788945;Pubmed 2000:10886401;	This cooperation between <b>IL-15</b> and <b>CD40L</b> reinforces the importance of tumor microenvironment and unravels a mechanism of FL growth that should be considered if using IL-15 as a drug in this disease.[Pubmed 2012:21788945];<b>IL-15</b> significantly increased the expression of <b>CD154</b> on SF and PB T cells from patients, whereas IL-2 had minimal effects.[Pubmed 2000:10886401];<b>I…	197294	Protein	IL-15	IL-15;IL15;Interleukin-15;il -15;il 15;il i-v;il- 15;interleukin 15;interleukin-1 5;interleukin15;	SWISSPROT_AC:P40933;SWISSPROT_ID:IL15_HUMAN;EMBL:AF031167;EMBL:AK122993;EMBL:AK290619;EMBL:AY720442;EMBL:BC018149;EMBL:BC100961;EMBL:BC100962;EMBL:BC100963;EMBL:CH471056;EMBL:CR541980;EMBL:CR542007;EMBL:U14407;EMBL:X91233;EMBL:X94222;EMBL:X94223;EMBL:Y09908;EMBL:Z38000;RefSeq:NP_000576.1;RefSeq:NP_751915.1;ProteinModelPortal:P40933;STRING:9606.ENSP00000296545;SWISSPROT_AC_OLD:D3DNZ2;SWISSPROT_AC_…	59248	Protein	CD40L	CD154 antigen;CD40 ligand;CD40-L;CD40L;CD40LG;T-cell antigen Gp39;TNF-related activation protein;TNFSF5;TRAP;Tumor necrosis factor ligand superfamily member 5;cd 154;cd 40 l;cd 40 ligand;cd-40 ligand;cd-40-ligand;CD154;cd40 l;cd40 ligand--an;cd40-ligand;cd40l g;cd40l--an;gp39;hCD40L;higm type 1;higm-1;HIGM1;IGM;IMD3;l-cd40;ligand cd40;ligand of cd40;ligand--cd40;ligand-cd40;t cell antigen gp39;T-…	SWISSPROT_AC:P29965;SWISSPROT_ID:CD40L_HUMAN;EMBL:BC071754;EMBL:BC074950;EMBL:D31797;EMBL:L07414;EMBL:X67878;EMBL:X68550;EMBL:Z15017;RefSeq:NP_000065.1;ProteinModelPortal:P29965;STRING:9606.ENSP00000359663;SMR:P29965;GeneID:959;KEGG:hsa:959;PIR:S28017;eggNOG:ENOG410IVYF;eggNOG:ENOG4111TET;UniGene:Hs.592244;GO:GO:0005174;GO:GO:0005615;GO:GO:0005622;GO:GO:0005886;GO:GO:0005887;GO:GO:0006954;GO:GO:0…
3399131	STAT3 -- IL-13	association	Pubmed 2000:11058569;Pubmed 2000:11127821;Pubmed 2010:21179488;	Expression of IL-13R alpha 1 evoked <b>STAT3</b> activation by IL-4 and <b>IL-13</b>, and in stimulated human B cells, on which IL-13R alpha 1 was highly expressed, IL-4 and IL-13 induced STAT3 activation.[Pubmed 2000:11058569];Expression of IL-13R alpha 1 evoked STAT3 activation by IL-4 and IL-13, and in stimulated human B cells, on which IL-13R alpha 1 was highly expressed, IL-4 and <b>IL-13</b…	461696	Protein	STAT3	Acute-phase response factor;APRF;Signal transducer and activator of transcription 3;STAT3;acute phase response factor;acute-phase response of factor;ADMIO;ADMIO1;HIES;stat 3;stat-3;	SWISSPROT_AC:P40763;SWISSPROT_ID:STAT3_HUMAN;EMBL:AC087691;EMBL:AF029311;EMBL:AJ012463;EMBL:AK291933;EMBL:AY572796;EMBL:BC000627;EMBL:BC014482;EMBL:CH471152;EMBL:JB252046;EMBL:L29277;RefSeq:NP_003141.2;RefSeq:NP_644805.1;RefSeq:NP_998827.1;RefSeq:XP_005257673.2;RefSeq:XP_005257674.2;RefSeq:XP_011523447.1;RefSeq:XP_011523448.1;RefSeq:XP_016880461.1;RefSeq:XP_016880464.1;ProteinModelPortal:P40763;S…	197279	Protein	IL-13	IL-13;IL13;Interleukin-13;NC30;il -13;il 13;il- 13;il-1 3;il1-3;interleukin 13;interleukin-1 3;interleukin13;nc 30;nc-30;p 600;p-600;P600;	SWISSPROT_AC:P35225;SWISSPROT_ID:IL13_HUMAN;EMBL:AC004039;EMBL:AF043334;EMBL:AF377331;EMBL:BC096139;EMBL:L06801;EMBL:U10307;EMBL:U31120;EMBL:X69079;RefSeq:NP_002179.2;ProteinModelPortal:P35225;STRING:9606.ENSP00000304915;SWISSPROT_AC_OLD:O43644;SWISSPROT_AC_OLD:Q4VB52;SWISSPROT_AC_OLD:Q9UDC7;SMR:P35225;GeneID:3596;KEGG:hsa:3596;PIR:I38060;eggNOG:ENOG410JCI3;eggNOG:ENOG4111BX2;UniGene:Hs.845;GO:GO…
3518384	FAS1 -- STAT3	association	Pubmed 2006:17133485;Pubmed 2001:11463377;Pubmed 2004:16212920;Pubmed 2002:11733515;	In contrast, overexpression of human HIP/PAP promoted liver resistance to <b>Fas</b> and accelerated liver regeneration with early activation/deactivation of <b>STAT3</b>.[Pubmed 2006:17133485];Suppression of <b>Fas</b> expression by <b>Stat3</b> and c-Jun is uncoupled from Stat3-mediated transcriptional activation.[Pubmed 2001:11463377];Hydrodynamic gene delivery of interleukin-22 protects the m…	492563	Protein	FAS1	Apo-1 antigen;Apoptosis-mediating surface antigen FAS;APT1;CD95 antigen;FAS;FAS1;FASLG receptor;TNFRSF6;TNR6;Tumor necrosis factor receptor superfamily member 6;ALPS1A;antigen cd95;apo -i;apo 1;apo i;APO-1;apo-1-antigen;apo-i;apo-isoform i;cd 95;cd-95;cd9 5;CD95;cd95-antigen;cd95-type;cell death surface receptor fas;cell surface death receptor fas;cell surface fas death receptor;cell's surface de…	SWISSPROT_AC:P25445;SWISSPROT_ID:TNR6_HUMAN;EMBL:AK290978;EMBL:AL157394;EMBL:AY450925;EMBL:AY495076;EMBL:BC012479;EMBL:CH471066;EMBL:FM246458;EMBL:M67454;EMBL:X63717;EMBL:X83490;EMBL:X83491;EMBL:X83492;EMBL:X83493;EMBL:X89101;EMBL:Z47993;EMBL:Z47994;EMBL:Z47995;EMBL:Z66556;EMBL:Z70519;EMBL:Z70520;RefSeq:NP_000034.1;RefSeq:NP_001307548.1;RefSeq:NP_690610.1;RefSeq:NP_690611.1;ProteinModelPortal:P25…	461696	Protein	STAT3	Acute-phase response factor;APRF;Signal transducer and activator of transcription 3;STAT3;acute phase response factor;acute-phase response of factor;ADMIO;ADMIO1;HIES;stat 3;stat-3;	SWISSPROT_AC:P40763;SWISSPROT_ID:STAT3_HUMAN;EMBL:AC087691;EMBL:AF029311;EMBL:AJ012463;EMBL:AK291933;EMBL:AY572796;EMBL:BC000627;EMBL:BC014482;EMBL:CH471152;EMBL:JB252046;EMBL:L29277;RefSeq:NP_003141.2;RefSeq:NP_644805.1;RefSeq:NP_998827.1;RefSeq:XP_005257673.2;RefSeq:XP_005257674.2;RefSeq:XP_011523447.1;RefSeq:XP_011523448.1;RefSeq:XP_016880461.1;RefSeq:XP_016880464.1;ProteinModelPortal:P40763;S…
5997322	TLR2 -- IL-15	association	Pubmed 2007:17289161;	TLR4 augmented the stimulatory effect of <b>TLR2</b> on <b>IL-15</b>, possibly contributing to the maintenance of synovitis in patients with RA.[Pubmed 2007:17289161];	490593	Protein	TLR2	CD282 antigen;TIL4;TLR2;Toll-like receptor 2;Toll/interleukin-1 receptor-like protein 4;CD282;receptor 2-toll-like;toll like receptor 2;toll like receptor ii;toll like receptor-2;toll-like receptor -2;toll-like receptor type 2;toll-like receptor-2;toll-like receptor2;toll-like-receptor 2;toll-like-receptor-2;toll-like-receptor2;	SWISSPROT_AC:O60603;SWISSPROT_ID:TLR2_HUMAN;EMBL:AB445624;EMBL:AF051152;EMBL:AF502291;EMBL:BC033756;EMBL:CH471056;EMBL:DQ012265;EMBL:DQ012266;EMBL:DQ012267;EMBL:DQ012268;EMBL:DQ012269;EMBL:DQ012270;EMBL:DQ012271;EMBL:U88878;RefSeq:NP_001305716.1;RefSeq:NP_001305718.1;RefSeq:NP_001305719.1;RefSeq:NP_001305720.1;RefSeq:NP_001305722.1;RefSeq:NP_001305724.1;RefSeq:NP_001305725.1;RefSeq:NP_003255.2;Re…	197294	Protein	IL-15	IL-15;IL15;Interleukin-15;il -15;il 15;il i-v;il- 15;interleukin 15;interleukin-1 5;interleukin15;	SWISSPROT_AC:P40933;SWISSPROT_ID:IL15_HUMAN;EMBL:AF031167;EMBL:AK122993;EMBL:AK290619;EMBL:AY720442;EMBL:BC018149;EMBL:BC100961;EMBL:BC100962;EMBL:BC100963;EMBL:CH471056;EMBL:CR541980;EMBL:CR542007;EMBL:U14407;EMBL:X91233;EMBL:X94222;EMBL:X94223;EMBL:Y09908;EMBL:Z38000;RefSeq:NP_000576.1;RefSeq:NP_751915.1;ProteinModelPortal:P40933;STRING:9606.ENSP00000296545;SWISSPROT_AC_OLD:D3DNZ2;SWISSPROT_AC_…
7392037	TLR2 -- IP-10	association	Pubmed 2011:21129050;Pubmed 2009:19447045;Pubmed 2016:27503209;Pubmed 2017:28327786;	In virus-induced acute asthma, levels of <b>IP-10</b> and IL-10 mRNA expression were correlated with the mRNA expression of <b>TLR2</b> and TLR3.[Pubmed 2011:21129050];Down-regulation of <b>TLR2</b> and TLR4 abrogates HG-induced <b>IP-10</b> release via NF-kappaB inhibition.[Pubmed 2009:19447045];<b>TLR2</b> Activation Limits Rhinovirus-Stimulated <b>CXCL-10</b> by Attenuating IRAK-1-Dependent IL…	490593	Protein	TLR2	CD282 antigen;TIL4;TLR2;Toll-like receptor 2;Toll/interleukin-1 receptor-like protein 4;CD282;receptor 2-toll-like;toll like receptor 2;toll like receptor ii;toll like receptor-2;toll-like receptor -2;toll-like receptor type 2;toll-like receptor-2;toll-like receptor2;toll-like-receptor 2;toll-like-receptor-2;toll-like-receptor2;	SWISSPROT_AC:O60603;SWISSPROT_ID:TLR2_HUMAN;EMBL:AB445624;EMBL:AF051152;EMBL:AF502291;EMBL:BC033756;EMBL:CH471056;EMBL:DQ012265;EMBL:DQ012266;EMBL:DQ012267;EMBL:DQ012268;EMBL:DQ012269;EMBL:DQ012270;EMBL:DQ012271;EMBL:U88878;RefSeq:NP_001305716.1;RefSeq:NP_001305718.1;RefSeq:NP_001305719.1;RefSeq:NP_001305720.1;RefSeq:NP_001305722.1;RefSeq:NP_001305724.1;RefSeq:NP_001305725.1;RefSeq:NP_003255.2;Re…	86038	Protein	IP-10	10 kDa interferon gamma-induced protein;C-X-C motif chemokine 10;CXCL10;CXL10;Gamma-IP10;INP10;IP-10;SCYB10;Small-inducible cytokine B10;10-kda interferon gamma-induced protein;C-X-C motif chemokine ligand 10;c-x-c motif ligand 10 chemokine;c-x-c-motif chemokine 10;C7;chemokine c-x-c motif ligand 10;chemokine c-x-c-motif ligand 10;crg-2;cxcl 10;cxcl-10;gamma ip-10;gamma-ip-10;gammaip-10;gIP-10;IF…	SWISSPROT_AC:P02778;SWISSPROT_ID:CXL10_HUMAN;EMBL:BC010954;EMBL:X02530;RefSeq:NP_001556.2;ProteinModelPortal:P02778;STRING:9606.ENSP00000305651;SWISSPROT_AC_OLD:Q96QJ5;SMR:P02778;GeneID:3627;KEGG:hsa:3627;PIR:A03243;eggNOG:ENOG410J1VC;eggNOG:ENOG410ZTJK;UniGene:Hs.632586;GO:GO:0005102;GO:GO:0005576;GO:GO:0005615;GO:GO:0006935;GO:GO:0006954;GO:GO:0006955;GO:GO:0007165;GO:GO:0007166;GO:GO:0007186;G…
7399556	CD40L -- APP	association	Pubmed 2009:19422822;	Recently, we showed that <b>CD40L</b> stimulation could increase <b>Abeta</b> levels via NFkappaB signaling, presumably through TRAFs.[Pubmed 2009:19422822];	59248	Protein	CD40L	CD154 antigen;CD40 ligand;CD40-L;CD40L;CD40LG;T-cell antigen Gp39;TNF-related activation protein;TNFSF5;TRAP;Tumor necrosis factor ligand superfamily member 5;cd 154;cd 40 l;cd 40 ligand;cd-40 ligand;cd-40-ligand;CD154;cd40 l;cd40 ligand--an;cd40-ligand;cd40l g;cd40l--an;gp39;hCD40L;higm type 1;higm-1;HIGM1;IGM;IMD3;l-cd40;ligand cd40;ligand of cd40;ligand--cd40;ligand-cd40;t cell antigen gp39;T-…	SWISSPROT_AC:P29965;SWISSPROT_ID:CD40L_HUMAN;EMBL:BC071754;EMBL:BC074950;EMBL:D31797;EMBL:L07414;EMBL:X67878;EMBL:X68550;EMBL:Z15017;RefSeq:NP_000065.1;ProteinModelPortal:P29965;STRING:9606.ENSP00000359663;SMR:P29965;GeneID:959;KEGG:hsa:959;PIR:S28017;eggNOG:ENOG410IVYF;eggNOG:ENOG4111TET;UniGene:Hs.592244;GO:GO:0005174;GO:GO:0005615;GO:GO:0005622;GO:GO:0005886;GO:GO:0005887;GO:GO:0006954;GO:GO:0…	3186	Protein	APP	A4;ABPP;AD1;Alzheimer disease amyloid protein;Amyloid beta A4 protein;Amyloid precursor protein;APP;APPI;Beta-amyloid precursor protein;Cerebral vascular amyloid peptide;CVAP;PN-II;PreA4;Protease nexin-II;AAA;aaa-type;ABETA;alzheimer's disease amyloid protein;amyloid b precursor protein;amyloid b protein precursor;amyloid b-protein precursor;amyloid beta precursor protein;amyloid beta protein a4;…	SWISSPROT_AC:P05067;SWISSPROT_ID:A4_HUMAN;EMBL:AB066441;EMBL:AF282245;EMBL:AK295621;EMBL:AK312326;EMBL:AP001439;EMBL:AP001440;EMBL:AP001441;EMBL:AP001442;EMBL:AP001443;EMBL:AY919674;EMBL:BC004369;EMBL:BC065529;EMBL:CH471079;EMBL:D87675;EMBL:M15532;EMBL:M15533;EMBL:M16765;EMBL:M18734;EMBL:M24546;EMBL:M24547;EMBL:M28373;EMBL:M29269;EMBL:M29270;EMBL:M33112;EMBL:M34862;EMBL:M34863;EMBL:M34864;EMBL:M3…
9170000	STAT3 -- IP-10	association	Pubmed 2012:22479586;	Then, we further determined the mechanisms how <b>STAT3</b> regulates HO-1 and <b>CXCL10</b> as well as mutual regulation among them in CRL-2581, a murine endothelial cell line.[Pubmed 2012:22479586];	461696	Protein	STAT3	Acute-phase response factor;APRF;Signal transducer and activator of transcription 3;STAT3;acute phase response factor;acute-phase response of factor;ADMIO;ADMIO1;HIES;stat 3;stat-3;	SWISSPROT_AC:P40763;SWISSPROT_ID:STAT3_HUMAN;EMBL:AC087691;EMBL:AF029311;EMBL:AJ012463;EMBL:AK291933;EMBL:AY572796;EMBL:BC000627;EMBL:BC014482;EMBL:CH471152;EMBL:JB252046;EMBL:L29277;RefSeq:NP_003141.2;RefSeq:NP_644805.1;RefSeq:NP_998827.1;RefSeq:XP_005257673.2;RefSeq:XP_005257674.2;RefSeq:XP_011523447.1;RefSeq:XP_011523448.1;RefSeq:XP_016880461.1;RefSeq:XP_016880464.1;ProteinModelPortal:P40763;S…	86038	Protein	IP-10	10 kDa interferon gamma-induced protein;C-X-C motif chemokine 10;CXCL10;CXL10;Gamma-IP10;INP10;IP-10;SCYB10;Small-inducible cytokine B10;10-kda interferon gamma-induced protein;C-X-C motif chemokine ligand 10;c-x-c motif ligand 10 chemokine;c-x-c-motif chemokine 10;C7;chemokine c-x-c motif ligand 10;chemokine c-x-c-motif ligand 10;crg-2;cxcl 10;cxcl-10;gamma ip-10;gamma-ip-10;gammaip-10;gIP-10;IF…	SWISSPROT_AC:P02778;SWISSPROT_ID:CXL10_HUMAN;EMBL:BC010954;EMBL:X02530;RefSeq:NP_001556.2;ProteinModelPortal:P02778;STRING:9606.ENSP00000305651;SWISSPROT_AC_OLD:Q96QJ5;SMR:P02778;GeneID:3627;KEGG:hsa:3627;PIR:A03243;eggNOG:ENOG410J1VC;eggNOG:ENOG410ZTJK;UniGene:Hs.632586;GO:GO:0005102;GO:GO:0005576;GO:GO:0005615;GO:GO:0006935;GO:GO:0006954;GO:GO:0006955;GO:GO:0007165;GO:GO:0007166;GO:GO:0007186;G…
9315331	TLR2 -- STAT3	association	Pubmed 2013:23232980;Pubmed 2012:22417709;	The results also indicate that NF-ÎºB and <b>Stat3</b> are required for TLR3-dependent up-regulation of <b>TLR2</b> and that its delayed expression was due to a requirement for IL-6-dependent Stat3 activation.[Pubmed 2013:23232980];The results also indicate that NF-ÃÂºB and <b>Stat3</b> are required for TLR3-dependent up-regulation of <b>TLR2</b> and that its delayed expression was due to a requ…	490593	Protein	TLR2	CD282 antigen;TIL4;TLR2;Toll-like receptor 2;Toll/interleukin-1 receptor-like protein 4;CD282;receptor 2-toll-like;toll like receptor 2;toll like receptor ii;toll like receptor-2;toll-like receptor -2;toll-like receptor type 2;toll-like receptor-2;toll-like receptor2;toll-like-receptor 2;toll-like-receptor-2;toll-like-receptor2;	SWISSPROT_AC:O60603;SWISSPROT_ID:TLR2_HUMAN;EMBL:AB445624;EMBL:AF051152;EMBL:AF502291;EMBL:BC033756;EMBL:CH471056;EMBL:DQ012265;EMBL:DQ012266;EMBL:DQ012267;EMBL:DQ012268;EMBL:DQ012269;EMBL:DQ012270;EMBL:DQ012271;EMBL:U88878;RefSeq:NP_001305716.1;RefSeq:NP_001305718.1;RefSeq:NP_001305719.1;RefSeq:NP_001305720.1;RefSeq:NP_001305722.1;RefSeq:NP_001305724.1;RefSeq:NP_001305725.1;RefSeq:NP_003255.2;Re…	461696	Protein	STAT3	Acute-phase response factor;APRF;Signal transducer and activator of transcription 3;STAT3;acute phase response factor;acute-phase response of factor;ADMIO;ADMIO1;HIES;stat 3;stat-3;	SWISSPROT_AC:P40763;SWISSPROT_ID:STAT3_HUMAN;EMBL:AC087691;EMBL:AF029311;EMBL:AJ012463;EMBL:AK291933;EMBL:AY572796;EMBL:BC000627;EMBL:BC014482;EMBL:CH471152;EMBL:JB252046;EMBL:L29277;RefSeq:NP_003141.2;RefSeq:NP_644805.1;RefSeq:NP_998827.1;RefSeq:XP_005257673.2;RefSeq:XP_005257674.2;RefSeq:XP_011523447.1;RefSeq:XP_011523448.1;RefSeq:XP_016880461.1;RefSeq:XP_016880464.1;ProteinModelPortal:P40763;S…
10716868	STAT3 -- IL-15	association	Pubmed 2014:24621498;	(2) anti-IL-15 antibody blocks <b>STAT3</b> activation induced by exogenous <b>IL-15</b> in non-malignant MF T cells, whereas the spontaneous STAT3 activation and IL-17F expression in malignant T cells is not inhibited;[Pubmed 2014:24621498];	461696	Protein	STAT3	Acute-phase response factor;APRF;Signal transducer and activator of transcription 3;STAT3;acute phase response factor;acute-phase response of factor;ADMIO;ADMIO1;HIES;stat 3;stat-3;	SWISSPROT_AC:P40763;SWISSPROT_ID:STAT3_HUMAN;EMBL:AC087691;EMBL:AF029311;EMBL:AJ012463;EMBL:AK291933;EMBL:AY572796;EMBL:BC000627;EMBL:BC014482;EMBL:CH471152;EMBL:JB252046;EMBL:L29277;RefSeq:NP_003141.2;RefSeq:NP_644805.1;RefSeq:NP_998827.1;RefSeq:XP_005257673.2;RefSeq:XP_005257674.2;RefSeq:XP_011523447.1;RefSeq:XP_011523448.1;RefSeq:XP_016880461.1;RefSeq:XP_016880464.1;ProteinModelPortal:P40763;S…	197294	Protein	IL-15	IL-15;IL15;Interleukin-15;il -15;il 15;il i-v;il- 15;interleukin 15;interleukin-1 5;interleukin15;	SWISSPROT_AC:P40933;SWISSPROT_ID:IL15_HUMAN;EMBL:AF031167;EMBL:AK122993;EMBL:AK290619;EMBL:AY720442;EMBL:BC018149;EMBL:BC100961;EMBL:BC100962;EMBL:BC100963;EMBL:CH471056;EMBL:CR541980;EMBL:CR542007;EMBL:U14407;EMBL:X91233;EMBL:X94222;EMBL:X94223;EMBL:Y09908;EMBL:Z38000;RefSeq:NP_000576.1;RefSeq:NP_751915.1;ProteinModelPortal:P40933;STRING:9606.ENSP00000296545;SWISSPROT_AC_OLD:D3DNZ2;SWISSPROT_AC_…
10720254	IL-15 -- IP-10	association	Pubmed 2014:24586509;	Moreover, the <b>CXCL10</b> expression in intestinal tissues was upregulated by poly I:C and <b>IL-15</b>.[Pubmed 2014:24586509];	197294	Protein	IL-15	IL-15;IL15;Interleukin-15;il -15;il 15;il i-v;il- 15;interleukin 15;interleukin-1 5;interleukin15;	SWISSPROT_AC:P40933;SWISSPROT_ID:IL15_HUMAN;EMBL:AF031167;EMBL:AK122993;EMBL:AK290619;EMBL:AY720442;EMBL:BC018149;EMBL:BC100961;EMBL:BC100962;EMBL:BC100963;EMBL:CH471056;EMBL:CR541980;EMBL:CR542007;EMBL:U14407;EMBL:X91233;EMBL:X94222;EMBL:X94223;EMBL:Y09908;EMBL:Z38000;RefSeq:NP_000576.1;RefSeq:NP_751915.1;ProteinModelPortal:P40933;STRING:9606.ENSP00000296545;SWISSPROT_AC_OLD:D3DNZ2;SWISSPROT_AC_…	86038	Protein	IP-10	10 kDa interferon gamma-induced protein;C-X-C motif chemokine 10;CXCL10;CXL10;Gamma-IP10;INP10;IP-10;SCYB10;Small-inducible cytokine B10;10-kda interferon gamma-induced protein;C-X-C motif chemokine ligand 10;c-x-c motif ligand 10 chemokine;c-x-c-motif chemokine 10;C7;chemokine c-x-c motif ligand 10;chemokine c-x-c-motif ligand 10;crg-2;cxcl 10;cxcl-10;gamma ip-10;gamma-ip-10;gammaip-10;gIP-10;IF…	SWISSPROT_AC:P02778;SWISSPROT_ID:CXL10_HUMAN;EMBL:BC010954;EMBL:X02530;RefSeq:NP_001556.2;ProteinModelPortal:P02778;STRING:9606.ENSP00000305651;SWISSPROT_AC_OLD:Q96QJ5;SMR:P02778;GeneID:3627;KEGG:hsa:3627;PIR:A03243;eggNOG:ENOG410J1VC;eggNOG:ENOG410ZTJK;UniGene:Hs.632586;GO:GO:0005102;GO:GO:0005576;GO:GO:0005615;GO:GO:0006935;GO:GO:0006954;GO:GO:0006955;GO:GO:0007165;GO:GO:0007166;GO:GO:0007186;G…
12500973	CXCL10 -- IP-10	association	Pubmed 1990:2118520;	Among the known members of the PF4 family, <b>CRG-2</b> is most closely related to the interferon-inducible human protein <b>IP-10</b>.[Pubmed 1990:2118520];The 5'-flanking region of the crg-2 gene was isolated, and comparisons between <b>crg-2</b> and <b>IP-10</b> genes, mRNAs, and proteins reveal conserved features of possible functional importance.[Pubmed 1990:2118520];	4342770	Gene	CXCL10	C-X-C motif chemokine ligand 10;C7;crg-2;CXCL10;gIP-10;IFI10;INP10;IP-10;mob-1;SCYB10;10 kDa interferon gamma-induced protein;10-kda interferon gamma-induced protein;C-X-C motif chemokine 10;c-x-c motif ligand 10 chemokine;c-x-c-motif chemokine 10;chemokine c-x-c motif ligand 10;chemokine c-x-c-motif ligand 10;cxcl 10;cxcl-10;CXL10;gamma ip-10;gamma-ip-10;Gamma-IP10;gammaip-10;ip 10;ip- 10;ip--10…	SWISSPROT_AC:P02778;SWISSPROT_ID:CXL10_HUMAN;GeneID:3627;Ensembl:ENSG00000169245;HGNC:HGNC:10637;MIM:147310;Vega:OTTHUMG00000160887;protein_accession:AAH10954.1;protein_accession:ABM83712.1;protein_accession:ABM87032.1;protein_accession:CAA26370.1;protein_accession:EAX05772.1;protein_accession:EAX05773.1;protein_accession:NP_001556.2;protein_accession:P02778.2;protein_gi:119626177;protein_gi:1196…	86038	Protein	IP-10	10 kDa interferon gamma-induced protein;C-X-C motif chemokine 10;CXCL10;CXL10;Gamma-IP10;INP10;IP-10;SCYB10;Small-inducible cytokine B10;10-kda interferon gamma-induced protein;C-X-C motif chemokine ligand 10;c-x-c motif ligand 10 chemokine;c-x-c-motif chemokine 10;C7;chemokine c-x-c motif ligand 10;chemokine c-x-c-motif ligand 10;crg-2;cxcl 10;cxcl-10;gamma ip-10;gamma-ip-10;gammaip-10;gIP-10;IF…	SWISSPROT_AC:P02778;SWISSPROT_ID:CXL10_HUMAN;EMBL:BC010954;EMBL:X02530;RefSeq:NP_001556.2;ProteinModelPortal:P02778;STRING:9606.ENSP00000305651;SWISSPROT_AC_OLD:Q96QJ5;SMR:P02778;GeneID:3627;KEGG:hsa:3627;PIR:A03243;eggNOG:ENOG410J1VC;eggNOG:ENOG410ZTJK;UniGene:Hs.632586;GO:GO:0005102;GO:GO:0005576;GO:GO:0005615;GO:GO:0006935;GO:GO:0006954;GO:GO:0006955;GO:GO:0007165;GO:GO:0007166;GO:GO:0007186;G…
12741582	C3 -- CD40L	association	Pubmed 1991:16839921;	In addition there was an increase in the plasma concentrations of prealbumin, haptoglobin and <b>complement C3</b> together with a rise in the concentrations of the circulating immunoglobulins <b>IgM</b> and IgA.[Pubmed 1991:16839921];	4340386	Gene	C3	AHUS5;ARMD9;ASP;C3;C3a;C3b;complement C3;CPAMD1;HEL-S-62p;c 3 complement;c-3 complement;c3 a;c3 alpha;c3 alpha-chain;C3 and PZP-like alpha-2-macroglobulin domain-containing protein 1;c3 b;c3 beta;c3 beta-chain;c3 chain a;c3 complement;c3--a;c3-beta;c3-complement;c3alpha;c3beta;chain-c3 alpha;CO3;complement c 3;complement c-3;complement-c3;	SWISSPROT_AC:P01024;SWISSPROT_ID:CO3_HUMAN;GeneID:718;Ensembl:ENSG00000125730;HGNC:HGNC:1318;MIM:120700;Vega:OTTHUMG00000150335;protein_accession:AAA35722.1;protein_accession:AAA85332.1;protein_accession:AAI50180.1;protein_accession:AAI50201.1;protein_accession:AAR89906.1;protein_accession:ACJ13656.1;protein_accession:BAG64978.1;protein_accession:CAI46844.1;protein_accession:EAW69070.1;protein_ac…	59248	Protein	CD40L	CD154 antigen;CD40 ligand;CD40-L;CD40L;CD40LG;T-cell antigen Gp39;TNF-related activation protein;TNFSF5;TRAP;Tumor necrosis factor ligand superfamily member 5;cd 154;cd 40 l;cd 40 ligand;cd-40 ligand;cd-40-ligand;CD154;cd40 l;cd40 ligand--an;cd40-ligand;cd40l g;cd40l--an;gp39;hCD40L;higm type 1;higm-1;HIGM1;IGM;IMD3;l-cd40;ligand cd40;ligand of cd40;ligand--cd40;ligand-cd40;t cell antigen gp39;T-…	SWISSPROT_AC:P29965;SWISSPROT_ID:CD40L_HUMAN;EMBL:BC071754;EMBL:BC074950;EMBL:D31797;EMBL:L07414;EMBL:X67878;EMBL:X68550;EMBL:Z15017;RefSeq:NP_000065.1;ProteinModelPortal:P29965;STRING:9606.ENSP00000359663;SMR:P29965;GeneID:959;KEGG:hsa:959;PIR:S28017;eggNOG:ENOG410IVYF;eggNOG:ENOG4111TET;UniGene:Hs.592244;GO:GO:0005174;GO:GO:0005615;GO:GO:0005622;GO:GO:0005886;GO:GO:0005887;GO:GO:0006954;GO:GO:0…
12824136	C3 -- CO3	association	Pubmed 1993:8081768;Pubmed 1991:1756717;	Limiting the activity of <b>C3b</b> reduces the production of the <b>C3a</b>, C4a and C5a anaphylotoxins, thus curtailing not only the immediate C3b-mediated lytic pathway but also the later effects of a cellular inflammatory response including endothelial and platelet cell activation.[Pubmed 1993:8081768];This was correlated with the conversion of the <b>C3 alpha-chain</b> to the alpha'-chain of…	4340386	Gene	C3	AHUS5;ARMD9;ASP;C3;C3a;C3b;complement C3;CPAMD1;HEL-S-62p;c 3 complement;c-3 complement;c3 a;c3 alpha;c3 alpha-chain;C3 and PZP-like alpha-2-macroglobulin domain-containing protein 1;c3 b;c3 beta;c3 beta-chain;c3 chain a;c3 complement;c3--a;c3-beta;c3-complement;c3alpha;c3beta;chain-c3 alpha;CO3;complement c 3;complement c-3;complement-c3;	SWISSPROT_AC:P01024;SWISSPROT_ID:CO3_HUMAN;GeneID:718;Ensembl:ENSG00000125730;HGNC:HGNC:1318;MIM:120700;Vega:OTTHUMG00000150335;protein_accession:AAA35722.1;protein_accession:AAA85332.1;protein_accession:AAI50180.1;protein_accession:AAI50201.1;protein_accession:AAR89906.1;protein_accession:ACJ13656.1;protein_accession:BAG64978.1;protein_accession:CAI46844.1;protein_accession:EAW69070.1;protein_ac…	72159	Protein	CO3	C3;C3 and PZP-like alpha-2-macroglobulin domain-containing protein 1;CO3;Complement C3;CPAMD1;AHUS5;ARMD9;ASP;c 3 complement;c-3 complement;c3 a;c3 alpha;c3 alpha-chain;c3 b;c3 beta;c3 beta-chain;c3 chain a;c3 complement;c3--a;c3-beta;c3-complement;C3a;c3alpha;C3b;c3beta;chain-c3 alpha;complement c 3;complement c-3;complement-c3;HEL-S-62p;	SWISSPROT_AC:P01024;SWISSPROT_ID:CO3_HUMAN;EMBL:AY513239;EMBL:BC150179;EMBL:BC150200;EMBL:CH471139;EMBL:K02765;RefSeq:NP_000055.2;ProteinModelPortal:P01024;STRING:9606.ENSP00000245907;SWISSPROT_AC_OLD:A7E236;SMR:P01024;GeneID:718;KEGG:hsa:718;PIR:A94065;eggNOG:ENOG410XRED;eggNOG:KOG1366;UniGene:Hs.529053;GO:GO:0001798;GO:GO:0001934;GO:GO:0001970;GO:GO:0004252;GO:GO:0004866;GO:GO:0005102;GO:GO:000…
13263243	CD40LG -- CD40L	association	Pubmed 1994:7510232;Pubmed 1993:8103673;Pubmed 2015:26223487;Pubmed 1996:8809473;	Blocking of CD40 with specific mAb, which have no intrinsic B cell stimulatory properties, or the <b>CD40 ligand</b> with a soluble CD40-human <b>IgM</b> fusion protein, resulted in dose-dependent, but only partial, inhibition of T cell-dependent immunoglobulin production with all modes of T cell activation tested.[Pubmed 1994:7510232];We have reported that T lymphocytes from three unrelated male…	4340589	Gene	CD40LG	CD154;CD40 ligand;CD40L;CD40LG;gp39;hCD40L;HIGM1;IGM;IMD3;T-BAM;TNFSF5;TRAP;cd 154;cd 40 l;cd 40 ligand;cd-40 ligand;cd-40-ligand;CD154 antigen;cd40 l;cd40 ligand--an;CD40-L;cd40-ligand;cd40l g;cd40l--an;higm type 1;higm-1;l-cd40;ligand cd40;ligand of cd40;ligand--cd40;ligand-cd40;t cell antigen gp39;T-cell antigen Gp39;TNF-related activation protein;Tumor necrosis factor ligand superfamily membe…	SWISSPROT_AC:P29965;SWISSPROT_ID:CD40L_HUMAN;GeneID:959;Ensembl:ENSG00000102245;HGNC:HGNC:11935;MIM:300386;Vega:OTTHUMG00000022512;protein_accession:AAA35662.1;protein_accession:AAC41932.1;protein_accession:AAD13982.1;protein_accession:AAH71754.1;protein_accession:AAH74950.1;protein_accession:AAP37943.1;protein_accession:AAQ09090.1;protein_accession:AAZ23548.1;protein_accession:ABK41936.1;protein…	59248	Protein	CD40L	CD154 antigen;CD40 ligand;CD40-L;CD40L;CD40LG;T-cell antigen Gp39;TNF-related activation protein;TNFSF5;TRAP;Tumor necrosis factor ligand superfamily member 5;cd 154;cd 40 l;cd 40 ligand;cd-40 ligand;cd-40-ligand;CD154;cd40 l;cd40 ligand--an;cd40-ligand;cd40l g;cd40l--an;gp39;hCD40L;higm type 1;higm-1;HIGM1;IGM;IMD3;l-cd40;ligand cd40;ligand of cd40;ligand--cd40;ligand-cd40;t cell antigen gp39;T-…	SWISSPROT_AC:P29965;SWISSPROT_ID:CD40L_HUMAN;EMBL:BC071754;EMBL:BC074950;EMBL:D31797;EMBL:L07414;EMBL:X67878;EMBL:X68550;EMBL:Z15017;RefSeq:NP_000065.1;ProteinModelPortal:P29965;STRING:9606.ENSP00000359663;SMR:P29965;GeneID:959;KEGG:hsa:959;PIR:S28017;eggNOG:ENOG410IVYF;eggNOG:ENOG4111TET;UniGene:Hs.592244;GO:GO:0005174;GO:GO:0005615;GO:GO:0005622;GO:GO:0005886;GO:GO:0005887;GO:GO:0006954;GO:GO:0…
13303090	IL1A -- CD40L	association	Pubmed 1993:8142596;	We found that <b>IL-1 alpha</b> was as potent in inducing <b>IgM</b> expression in 70Z/3 cells as it was in inducing IL-2 secretion in EL-4 6.1 C10 cells.[Pubmed 1993:8142596];	4342708	Gene	IL1A	IL-1A;IL1;IL1-ALPHA;IL1A;IL1F1;interleukin 1 alpha;Hematopoietin-1;il -1alpha;il 1 a;il 1 alpha;il 1-alpha;il 1a;il 1alpha;il- 1 alpha;il- 1alpha;il-1 a;IL-1 alpha;il-1-a;il-1-alpha;il-i alpha;il-i-alpha;il-ialpha;il1 a;il1 alpha;il1-a;il1alpha;interleukin -1 alpha;interleukin -1alpha;interleukin 1-a;interleukin 1-alpha;interleukin 1a;interleukin 1alpha;interleukin i alpha;interleukin- 1 alpha;in…	SWISSPROT_AC:P01583;SWISSPROT_ID:IL1A_HUMAN;GeneID:3552;Ensembl:ENSG00000115008;HGNC:HGNC:5991;MIM:147760;Vega:OTTHUMG00000131315;protein_accession:AAA59133.1;protein_accession:AAH13142.1;protein_accession:AAM96189.1;protein_accession:AAP35660.1;protein_accession:AAX93054.1;protein_accession:ABM81601.1;protein_accession:ABM84782.1;protein_accession:BAG37367.1;protein_accession:CAA26371.1;protein_…	59248	Protein	CD40L	CD154 antigen;CD40 ligand;CD40-L;CD40L;CD40LG;T-cell antigen Gp39;TNF-related activation protein;TNFSF5;TRAP;Tumor necrosis factor ligand superfamily member 5;cd 154;cd 40 l;cd 40 ligand;cd-40 ligand;cd-40-ligand;CD154;cd40 l;cd40 ligand--an;cd40-ligand;cd40l g;cd40l--an;gp39;hCD40L;higm type 1;higm-1;HIGM1;IGM;IMD3;l-cd40;ligand cd40;ligand of cd40;ligand--cd40;ligand-cd40;t cell antigen gp39;T-…	SWISSPROT_AC:P29965;SWISSPROT_ID:CD40L_HUMAN;EMBL:BC071754;EMBL:BC074950;EMBL:D31797;EMBL:L07414;EMBL:X67878;EMBL:X68550;EMBL:Z15017;RefSeq:NP_000065.1;ProteinModelPortal:P29965;STRING:9606.ENSP00000359663;SMR:P29965;GeneID:959;KEGG:hsa:959;PIR:S28017;eggNOG:ENOG410IVYF;eggNOG:ENOG4111TET;UniGene:Hs.592244;GO:GO:0005174;GO:GO:0005615;GO:GO:0005622;GO:GO:0005886;GO:GO:0005887;GO:GO:0006954;GO:GO:0…
13683864	IL1A -- APP	association	Pubmed 2006:16724341;Pubmed 1995:8564570;	Concomitantly, the level of <b>sAPPalpha</b> was significantly increased by <b>IL-1alpha</b> in 48 hr;[Pubmed 2006:16724341];Our data show a complex mechanism of <b>sAPPalpha</b> regulation by <b>IL-1alpha</b> that involves ADAM-10, ADAM-17 and p38 MAPK upstream of MEK and PI3K.[Pubmed 2006:16724341];<b>IL1</b> and TNF alpha mediated stimulation of type 1 <b>APP</b> genes is synergistically enhan…	4342708	Gene	IL1A	IL-1A;IL1;IL1-ALPHA;IL1A;IL1F1;interleukin 1 alpha;Hematopoietin-1;il -1alpha;il 1 a;il 1 alpha;il 1-alpha;il 1a;il 1alpha;il- 1 alpha;il- 1alpha;il-1 a;IL-1 alpha;il-1-a;il-1-alpha;il-i alpha;il-i-alpha;il-ialpha;il1 a;il1 alpha;il1-a;il1alpha;interleukin -1 alpha;interleukin -1alpha;interleukin 1-a;interleukin 1-alpha;interleukin 1a;interleukin 1alpha;interleukin i alpha;interleukin- 1 alpha;in…	SWISSPROT_AC:P01583;SWISSPROT_ID:IL1A_HUMAN;GeneID:3552;Ensembl:ENSG00000115008;HGNC:HGNC:5991;MIM:147760;Vega:OTTHUMG00000131315;protein_accession:AAA59133.1;protein_accession:AAH13142.1;protein_accession:AAM96189.1;protein_accession:AAP35660.1;protein_accession:AAX93054.1;protein_accession:ABM81601.1;protein_accession:ABM84782.1;protein_accession:BAG37367.1;protein_accession:CAA26371.1;protein_…	3186	Protein	APP	A4;ABPP;AD1;Alzheimer disease amyloid protein;Amyloid beta A4 protein;Amyloid precursor protein;APP;APPI;Beta-amyloid precursor protein;Cerebral vascular amyloid peptide;CVAP;PN-II;PreA4;Protease nexin-II;AAA;aaa-type;ABETA;alzheimer's disease amyloid protein;amyloid b precursor protein;amyloid b protein precursor;amyloid b-protein precursor;amyloid beta precursor protein;amyloid beta protein a4;…	SWISSPROT_AC:P05067;SWISSPROT_ID:A4_HUMAN;EMBL:AB066441;EMBL:AF282245;EMBL:AK295621;EMBL:AK312326;EMBL:AP001439;EMBL:AP001440;EMBL:AP001441;EMBL:AP001442;EMBL:AP001443;EMBL:AY919674;EMBL:BC004369;EMBL:BC065529;EMBL:CH471079;EMBL:D87675;EMBL:M15532;EMBL:M15533;EMBL:M16765;EMBL:M18734;EMBL:M24546;EMBL:M24547;EMBL:M28373;EMBL:M29269;EMBL:M29270;EMBL:M33112;EMBL:M34862;EMBL:M34863;EMBL:M34864;EMBL:M3…
13683880	APP -- IL-1 alpha	association	Pubmed 2006:16724341;Pubmed 1995:8564570;	Concomitantly, the level of <b>sAPPalpha</b> was significantly increased by <b>IL-1alpha</b> in 48 hr;[Pubmed 2006:16724341];Our data show a complex mechanism of <b>sAPPalpha</b> regulation by <b>IL-1alpha</b> that involves ADAM-10, ADAM-17 and p38 MAPK upstream of MEK and PI3K.[Pubmed 2006:16724341];<b>IL1</b> and TNF alpha mediated stimulation of type 1 <b>APP</b> genes is synergistically enhan…	4340093	Gene	APP	AAA;ABETA;ABPP;AD1;amyloid beta precursor protein;APP;APPI;CTFgamma;CVAP;PN-II;PN2;A4;aaa-type;Alzheimer disease amyloid protein;alzheimer's disease amyloid protein;amyloid b precursor protein;amyloid b protein precursor;amyloid b-protein precursor;Amyloid beta A4 protein;amyloid beta protein a4;amyloid beta- protein precursor;amyloid beta-a4 protein;amyloid beta-protein precursor;Amyloid precurs…	SWISSPROT_AC:P05067;SWISSPROT_ID:A4_HUMAN;GeneID:351;Ensembl:ENSG00000142192;HGNC:HGNC:620;MIM:104760;Vega:OTTHUMG00000078438;protein_accession:AAA35540.1;protein_accession:AAA51564.1;protein_accession:AAA51722.1;protein_accession:AAA51726.1;protein_accession:AAA51727.1;protein_accession:AAA51768.1;protein_accession:AAA58727.1;protein_accession:AAA60163.1;protein_accession:AAB19991.1;protein_acce…	197367	Protein	IL-1 alpha	Hematopoietin-1;IL-1 alpha;IL1A;IL1F1;Interleukin-1 alpha;il -1alpha;il 1 a;il 1 alpha;il 1-alpha;il 1a;il 1alpha;il- 1 alpha;il- 1alpha;il-1 a;il-1-a;il-1-alpha;IL-1A;il-i alpha;il-i-alpha;il-ialpha;IL1;il1 a;il1 alpha;il1-a;IL1-ALPHA;il1alpha;interleukin -1 alpha;interleukin -1alpha;interleukin 1 alpha;interleukin 1-a;interleukin 1-alpha;interleukin 1a;interleukin 1alpha;interleukin i alpha;int…	SWISSPROT_AC:P01583;SWISSPROT_ID:IL1A_HUMAN;EMBL:AC112235;EMBL:AF536338;EMBL:AK314850;EMBL:BC013142;EMBL:BN000002;EMBL:BT007014;EMBL:CH471217;EMBL:CR457414;EMBL:M15329;EMBL:M28983;EMBL:X02531;EMBL:X02851;EMBL:X03833;EMBL:X56086;RefSeq:NP_000566.3;ProteinModelPortal:P01583;STRING:9606.ENSP00000263339;SWISSPROT_AC_OLD:Q53QF9;SWISSPROT_AC_OLD:Q7RU02;SMR:P01583;GeneID:3552;KEGG:hsa:3552;PIR:A23385;eg…
13683950	IL1A -- APP	association	Pubmed 2006:16724341;Pubmed 1995:8564570;	Concomitantly, the level of <b>sAPPalpha</b> was significantly increased by <b>IL-1alpha</b> in 48 hr;[Pubmed 2006:16724341];Our data show a complex mechanism of <b>sAPPalpha</b> regulation by <b>IL-1alpha</b> that involves ADAM-10, ADAM-17 and p38 MAPK upstream of MEK and PI3K.[Pubmed 2006:16724341];<b>IL1</b> and TNF alpha mediated stimulation of type 1 <b>APP</b> genes is synergistically enhan…	4342708	Gene	IL1A	IL-1A;IL1;IL1-ALPHA;IL1A;IL1F1;interleukin 1 alpha;Hematopoietin-1;il -1alpha;il 1 a;il 1 alpha;il 1-alpha;il 1a;il 1alpha;il- 1 alpha;il- 1alpha;il-1 a;IL-1 alpha;il-1-a;il-1-alpha;il-i alpha;il-i-alpha;il-ialpha;il1 a;il1 alpha;il1-a;il1alpha;interleukin -1 alpha;interleukin -1alpha;interleukin 1-a;interleukin 1-alpha;interleukin 1a;interleukin 1alpha;interleukin i alpha;interleukin- 1 alpha;in…	SWISSPROT_AC:P01583;SWISSPROT_ID:IL1A_HUMAN;GeneID:3552;Ensembl:ENSG00000115008;HGNC:HGNC:5991;MIM:147760;Vega:OTTHUMG00000131315;protein_accession:AAA59133.1;protein_accession:AAH13142.1;protein_accession:AAM96189.1;protein_accession:AAP35660.1;protein_accession:AAX93054.1;protein_accession:ABM81601.1;protein_accession:ABM84782.1;protein_accession:BAG37367.1;protein_accession:CAA26371.1;protein_…	4340093	Gene	APP	AAA;ABETA;ABPP;AD1;amyloid beta precursor protein;APP;APPI;CTFgamma;CVAP;PN-II;PN2;A4;aaa-type;Alzheimer disease amyloid protein;alzheimer's disease amyloid protein;amyloid b precursor protein;amyloid b protein precursor;amyloid b-protein precursor;Amyloid beta A4 protein;amyloid beta protein a4;amyloid beta- protein precursor;amyloid beta-a4 protein;amyloid beta-protein precursor;Amyloid precurs…	SWISSPROT_AC:P05067;SWISSPROT_ID:A4_HUMAN;GeneID:351;Ensembl:ENSG00000142192;HGNC:HGNC:620;MIM:104760;Vega:OTTHUMG00000078438;protein_accession:AAA35540.1;protein_accession:AAA51564.1;protein_accession:AAA51722.1;protein_accession:AAA51726.1;protein_accession:AAA51727.1;protein_accession:AAA51768.1;protein_accession:AAA58727.1;protein_accession:AAA60163.1;protein_accession:AAB19991.1;protein_acce…
14221738	IL1A -- IL-13	association	Pubmed 1996:8886420;Pubmed 1998:9644628;	<b>IL-13</b> was found to up-regulate significantly (P &lt; 0.01) the <b>IL-1 alpha</b> but not the TNF-alpha-induced IL-8 generation by HT-29 cells.[Pubmed 1996:8886420];IL-4 or <b>IL-13</b> in combination with <b>IL-1 alpha</b> + IFN-gamma or IFN-gamma + TNF-alpha resulted in a two- to fourfold augmentation of RANTES production, ranging from 2.2 +/- 0.2 to 35 +/- 2 ng/ml in different cell lines…	4342708	Gene	IL1A	IL-1A;IL1;IL1-ALPHA;IL1A;IL1F1;interleukin 1 alpha;Hematopoietin-1;il -1alpha;il 1 a;il 1 alpha;il 1-alpha;il 1a;il 1alpha;il- 1 alpha;il- 1alpha;il-1 a;IL-1 alpha;il-1-a;il-1-alpha;il-i alpha;il-i-alpha;il-ialpha;il1 a;il1 alpha;il1-a;il1alpha;interleukin -1 alpha;interleukin -1alpha;interleukin 1-a;interleukin 1-alpha;interleukin 1a;interleukin 1alpha;interleukin i alpha;interleukin- 1 alpha;in…	SWISSPROT_AC:P01583;SWISSPROT_ID:IL1A_HUMAN;GeneID:3552;Ensembl:ENSG00000115008;HGNC:HGNC:5991;MIM:147760;Vega:OTTHUMG00000131315;protein_accession:AAA59133.1;protein_accession:AAH13142.1;protein_accession:AAM96189.1;protein_accession:AAP35660.1;protein_accession:AAX93054.1;protein_accession:ABM81601.1;protein_accession:ABM84782.1;protein_accession:BAG37367.1;protein_accession:CAA26371.1;protein_…	197279	Protein	IL-13	IL-13;IL13;Interleukin-13;NC30;il -13;il 13;il- 13;il-1 3;il1-3;interleukin 13;interleukin-1 3;interleukin13;nc 30;nc-30;p 600;p-600;P600;	SWISSPROT_AC:P35225;SWISSPROT_ID:IL13_HUMAN;EMBL:AC004039;EMBL:AF043334;EMBL:AF377331;EMBL:BC096139;EMBL:L06801;EMBL:U10307;EMBL:U31120;EMBL:X69079;RefSeq:NP_002179.2;ProteinModelPortal:P35225;STRING:9606.ENSP00000304915;SWISSPROT_AC_OLD:O43644;SWISSPROT_AC_OLD:Q4VB52;SWISSPROT_AC_OLD:Q9UDC7;SMR:P35225;GeneID:3596;KEGG:hsa:3596;PIR:I38060;eggNOG:ENOG410JCI3;eggNOG:ENOG4111BX2;UniGene:Hs.845;GO:GO…
14221818	IL13 -- IL-1 alpha	association	Pubmed 1996:8886420;	<b>IL-13</b> was found to up-regulate significantly (P &lt; 0.01) the <b>IL-1 alpha</b> but not the TNF-alpha-induced IL-8 generation by HT-29 cells.[Pubmed 1996:8886420];	4342745	Gene	IL13	IL-13;IL13;interleukin 13;P600;il -13;il 13;il- 13;il-1 3;il1-3;interleukin-1 3;Interleukin-13;interleukin13;nc 30;nc-30;NC30;p 600;p-600;	SWISSPROT_AC:P35225;SWISSPROT_ID:IL13_HUMAN;GeneID:3596;Ensembl:ENSG00000169194;HGNC:HGNC:5973;MIM:147683;Vega:OTTHUMG00000059723;protein_accession:AAA36107.1;protein_accession:AAA83738.1;protein_accession:AAB01681.1;protein_accession:AAC03535.1;protein_accession:AAH96138.1;protein_accession:AAH96139.1;protein_accession:AAH96140.1;protein_accession:AAH96141.2;protein_accession:AAK53823.1;protein_…	197367	Protein	IL-1 alpha	Hematopoietin-1;IL-1 alpha;IL1A;IL1F1;Interleukin-1 alpha;il -1alpha;il 1 a;il 1 alpha;il 1-alpha;il 1a;il 1alpha;il- 1 alpha;il- 1alpha;il-1 a;il-1-a;il-1-alpha;IL-1A;il-i alpha;il-i-alpha;il-ialpha;IL1;il1 a;il1 alpha;il1-a;IL1-ALPHA;il1alpha;interleukin -1 alpha;interleukin -1alpha;interleukin 1 alpha;interleukin 1-a;interleukin 1-alpha;interleukin 1a;interleukin 1alpha;interleukin i alpha;int…	SWISSPROT_AC:P01583;SWISSPROT_ID:IL1A_HUMAN;EMBL:AC112235;EMBL:AF536338;EMBL:AK314850;EMBL:BC013142;EMBL:BN000002;EMBL:BT007014;EMBL:CH471217;EMBL:CR457414;EMBL:M15329;EMBL:M28983;EMBL:X02531;EMBL:X02851;EMBL:X03833;EMBL:X56086;RefSeq:NP_000566.3;ProteinModelPortal:P01583;STRING:9606.ENSP00000263339;SWISSPROT_AC_OLD:Q53QF9;SWISSPROT_AC_OLD:Q7RU02;SMR:P01583;GeneID:3552;KEGG:hsa:3552;PIR:A23385;eg…
14221842	IL13 -- IL1A	association	Pubmed 1996:8886420;	<b>IL-13</b> was found to up-regulate significantly (P &lt; 0.01) the <b>IL-1 alpha</b> but not the TNF-alpha-induced IL-8 generation by HT-29 cells.[Pubmed 1996:8886420];	4342745	Gene	IL13	IL-13;IL13;interleukin 13;P600;il -13;il 13;il- 13;il-1 3;il1-3;interleukin-1 3;Interleukin-13;interleukin13;nc 30;nc-30;NC30;p 600;p-600;	SWISSPROT_AC:P35225;SWISSPROT_ID:IL13_HUMAN;GeneID:3596;Ensembl:ENSG00000169194;HGNC:HGNC:5973;MIM:147683;Vega:OTTHUMG00000059723;protein_accession:AAA36107.1;protein_accession:AAA83738.1;protein_accession:AAB01681.1;protein_accession:AAC03535.1;protein_accession:AAH96138.1;protein_accession:AAH96139.1;protein_accession:AAH96140.1;protein_accession:AAH96141.2;protein_accession:AAK53823.1;protein_…	4342708	Gene	IL1A	IL-1A;IL1;IL1-ALPHA;IL1A;IL1F1;interleukin 1 alpha;Hematopoietin-1;il -1alpha;il 1 a;il 1 alpha;il 1-alpha;il 1a;il 1alpha;il- 1 alpha;il- 1alpha;il-1 a;IL-1 alpha;il-1-a;il-1-alpha;il-i alpha;il-i-alpha;il-ialpha;il1 a;il1 alpha;il1-a;il1alpha;interleukin -1 alpha;interleukin -1alpha;interleukin 1-a;interleukin 1-alpha;interleukin 1a;interleukin 1alpha;interleukin i alpha;interleukin- 1 alpha;in…	SWISSPROT_AC:P01583;SWISSPROT_ID:IL1A_HUMAN;GeneID:3552;Ensembl:ENSG00000115008;HGNC:HGNC:5991;MIM:147760;Vega:OTTHUMG00000131315;protein_accession:AAA59133.1;protein_accession:AAH13142.1;protein_accession:AAM96189.1;protein_accession:AAP35660.1;protein_accession:AAX93054.1;protein_accession:ABM81601.1;protein_accession:ABM84782.1;protein_accession:BAG37367.1;protein_accession:CAA26371.1;protein_…
14239062	CD40LG -- FAS1	association	Pubmed 1996:8871610;Pubmed 2009:19404646;	It has been shown that <b>CD40L</b> can induce both <b>Fas</b> expression and susceptibility to Fas-mediated killing in B cells, while anti-Ig can partially rescue B cells from Fas-mediated killing.[Pubmed 1996:8871610];In SLE and RA patients, <b>FAS</b> expression strongly correlated with <b>CD154</b> expression on T cells, which was not found in healthy control donors.[Pubmed 2009:19404646];	4340589	Gene	CD40LG	CD154;CD40 ligand;CD40L;CD40LG;gp39;hCD40L;HIGM1;IGM;IMD3;T-BAM;TNFSF5;TRAP;cd 154;cd 40 l;cd 40 ligand;cd-40 ligand;cd-40-ligand;CD154 antigen;cd40 l;cd40 ligand--an;CD40-L;cd40-ligand;cd40l g;cd40l--an;higm type 1;higm-1;l-cd40;ligand cd40;ligand of cd40;ligand--cd40;ligand-cd40;t cell antigen gp39;T-cell antigen Gp39;TNF-related activation protein;Tumor necrosis factor ligand superfamily membe…	SWISSPROT_AC:P29965;SWISSPROT_ID:CD40L_HUMAN;GeneID:959;Ensembl:ENSG00000102245;HGNC:HGNC:11935;MIM:300386;Vega:OTTHUMG00000022512;protein_accession:AAA35662.1;protein_accession:AAC41932.1;protein_accession:AAD13982.1;protein_accession:AAH71754.1;protein_accession:AAH74950.1;protein_accession:AAP37943.1;protein_accession:AAQ09090.1;protein_accession:AAZ23548.1;protein_accession:ABK41936.1;protein…	492563	Protein	FAS1	Apo-1 antigen;Apoptosis-mediating surface antigen FAS;APT1;CD95 antigen;FAS;FAS1;FASLG receptor;TNFRSF6;TNR6;Tumor necrosis factor receptor superfamily member 6;ALPS1A;antigen cd95;apo -i;apo 1;apo i;APO-1;apo-1-antigen;apo-i;apo-isoform i;cd 95;cd-95;cd9 5;CD95;cd95-antigen;cd95-type;cell death surface receptor fas;cell surface death receptor fas;cell surface fas death receptor;cell's surface de…	SWISSPROT_AC:P25445;SWISSPROT_ID:TNR6_HUMAN;EMBL:AK290978;EMBL:AL157394;EMBL:AY450925;EMBL:AY495076;EMBL:BC012479;EMBL:CH471066;EMBL:FM246458;EMBL:M67454;EMBL:X63717;EMBL:X83490;EMBL:X83491;EMBL:X83492;EMBL:X83493;EMBL:X89101;EMBL:Z47993;EMBL:Z47994;EMBL:Z47995;EMBL:Z66556;EMBL:Z70519;EMBL:Z70520;RefSeq:NP_000034.1;RefSeq:NP_001307548.1;RefSeq:NP_690610.1;RefSeq:NP_690611.1;ProteinModelPortal:P25…
14406411	FAS -- FAS1	association	Pubmed:12169207;Pubmed 1997:9088975;	We show here that human DC generated from adherent peripheral blood mononuclear cells (PBMC) after in vitro stimulation with granulocyte macrophage colony stimulating factor (GM-CSF) and interleukin-4 (IL-4) express Fas antigen (<b>APO-1</b>, CD95) and can undergo apoptosis upon triggering of <b>Fas</b> by monoclonal antibodies.[Pubmed:12169207];We show here that human DC generated from adherent …	4340096	Gene	FAS	ALPS1A;APO-1;APT1;CD95;FAS;Fas cell surface death receptor;FAS1;FASTM;TNFRSF6;antigen cd95;apo -i;apo 1;apo i;Apo-1 antigen;apo-1-antigen;apo-i;apo-isoform i;Apoptosis-mediating surface antigen FAS;cd 95;cd-95;cd9 5;CD95 antigen;cd95-antigen;cd95-type;cell death surface receptor fas;cell surface death receptor fas;cell surface fas death receptor;cell's surface death receptor fas;cell-surface deat…	SWISSPROT_AC:P25445;SWISSPROT_ID:TNR6_HUMAN;GeneID:355;Ensembl:ENSG00000026103;HGNC:HGNC:11920;MIM:134637;Vega:OTTHUMG00000018701;protein_accession:AAA63174.1;protein_accession:AAC16236.1;protein_accession:AAC16237.1;protein_accession:AAD14292.1;protein_accession:AAH12479.1;protein_accession:AAR08906.1;protein_accession:AAS76663.1;protein_accession:ABM85601.1;protein_accession:ACC91884.1;protein_…	492563	Protein	FAS1	Apo-1 antigen;Apoptosis-mediating surface antigen FAS;APT1;CD95 antigen;FAS;FAS1;FASLG receptor;TNFRSF6;TNR6;Tumor necrosis factor receptor superfamily member 6;ALPS1A;antigen cd95;apo -i;apo 1;apo i;APO-1;apo-1-antigen;apo-i;apo-isoform i;cd 95;cd-95;cd9 5;CD95;cd95-antigen;cd95-type;cell death surface receptor fas;cell surface death receptor fas;cell surface fas death receptor;cell's surface de…	SWISSPROT_AC:P25445;SWISSPROT_ID:TNR6_HUMAN;EMBL:AK290978;EMBL:AL157394;EMBL:AY450925;EMBL:AY495076;EMBL:BC012479;EMBL:CH471066;EMBL:FM246458;EMBL:M67454;EMBL:X63717;EMBL:X83490;EMBL:X83491;EMBL:X83492;EMBL:X83493;EMBL:X89101;EMBL:Z47993;EMBL:Z47994;EMBL:Z47995;EMBL:Z66556;EMBL:Z70519;EMBL:Z70520;RefSeq:NP_000034.1;RefSeq:NP_001307548.1;RefSeq:NP_690610.1;RefSeq:NP_690611.1;ProteinModelPortal:P25…
14470716	CD40LG -- IL-13	association	Pubmed 1997:9192766;	<b>Interleukin-13</b> in combination with <b>CD40 ligand</b> potently inhibits apoptosis in human B lymphocytes: upregulation of Bcl-xL and Mcl-1.[Pubmed 1997:9192766];	4340589	Gene	CD40LG	CD154;CD40 ligand;CD40L;CD40LG;gp39;hCD40L;HIGM1;IGM;IMD3;T-BAM;TNFSF5;TRAP;cd 154;cd 40 l;cd 40 ligand;cd-40 ligand;cd-40-ligand;CD154 antigen;cd40 l;cd40 ligand--an;CD40-L;cd40-ligand;cd40l g;cd40l--an;higm type 1;higm-1;l-cd40;ligand cd40;ligand of cd40;ligand--cd40;ligand-cd40;t cell antigen gp39;T-cell antigen Gp39;TNF-related activation protein;Tumor necrosis factor ligand superfamily membe…	SWISSPROT_AC:P29965;SWISSPROT_ID:CD40L_HUMAN;GeneID:959;Ensembl:ENSG00000102245;HGNC:HGNC:11935;MIM:300386;Vega:OTTHUMG00000022512;protein_accession:AAA35662.1;protein_accession:AAC41932.1;protein_accession:AAD13982.1;protein_accession:AAH71754.1;protein_accession:AAH74950.1;protein_accession:AAP37943.1;protein_accession:AAQ09090.1;protein_accession:AAZ23548.1;protein_accession:ABK41936.1;protein…	197279	Protein	IL-13	IL-13;IL13;Interleukin-13;NC30;il -13;il 13;il- 13;il-1 3;il1-3;interleukin 13;interleukin-1 3;interleukin13;nc 30;nc-30;p 600;p-600;P600;	SWISSPROT_AC:P35225;SWISSPROT_ID:IL13_HUMAN;EMBL:AC004039;EMBL:AF043334;EMBL:AF377331;EMBL:BC096139;EMBL:L06801;EMBL:U10307;EMBL:U31120;EMBL:X69079;RefSeq:NP_002179.2;ProteinModelPortal:P35225;STRING:9606.ENSP00000304915;SWISSPROT_AC_OLD:O43644;SWISSPROT_AC_OLD:Q4VB52;SWISSPROT_AC_OLD:Q9UDC7;SMR:P35225;GeneID:3596;KEGG:hsa:3596;PIR:I38060;eggNOG:ENOG410JCI3;eggNOG:ENOG4111BX2;UniGene:Hs.845;GO:GO…
14470744	IL13 -- CD40L	association	Pubmed 2014:25343623;Pubmed 1997:9192766;	Intriguingly, maximum TNF-Î±, IL-6 and <b>IL-13</b> with low anti-CHIKV <b>IgM</b> response found in subjects recovered from CHIKV within one month of illness.[Pubmed 2014:25343623];Intriguingly, maximum TNF-ÃÂ±, IL-6 and <b>IL-13</b> with low anti-CHIKV <b>IgM</b> response found in subjects recovered from CHIKV within one month of illness.[Pubmed 2014:25343623];Intriguingly, maximum TNF-?, IL-6…	4342745	Gene	IL13	IL-13;IL13;interleukin 13;P600;il -13;il 13;il- 13;il-1 3;il1-3;interleukin-1 3;Interleukin-13;interleukin13;nc 30;nc-30;NC30;p 600;p-600;	SWISSPROT_AC:P35225;SWISSPROT_ID:IL13_HUMAN;GeneID:3596;Ensembl:ENSG00000169194;HGNC:HGNC:5973;MIM:147683;Vega:OTTHUMG00000059723;protein_accession:AAA36107.1;protein_accession:AAA83738.1;protein_accession:AAB01681.1;protein_accession:AAC03535.1;protein_accession:AAH96138.1;protein_accession:AAH96139.1;protein_accession:AAH96140.1;protein_accession:AAH96141.2;protein_accession:AAK53823.1;protein_…	59248	Protein	CD40L	CD154 antigen;CD40 ligand;CD40-L;CD40L;CD40LG;T-cell antigen Gp39;TNF-related activation protein;TNFSF5;TRAP;Tumor necrosis factor ligand superfamily member 5;cd 154;cd 40 l;cd 40 ligand;cd-40 ligand;cd-40-ligand;CD154;cd40 l;cd40 ligand--an;cd40-ligand;cd40l g;cd40l--an;gp39;hCD40L;higm type 1;higm-1;HIGM1;IGM;IMD3;l-cd40;ligand cd40;ligand of cd40;ligand--cd40;ligand-cd40;t cell antigen gp39;T-…	SWISSPROT_AC:P29965;SWISSPROT_ID:CD40L_HUMAN;EMBL:BC071754;EMBL:BC074950;EMBL:D31797;EMBL:L07414;EMBL:X67878;EMBL:X68550;EMBL:Z15017;RefSeq:NP_000065.1;ProteinModelPortal:P29965;STRING:9606.ENSP00000359663;SMR:P29965;GeneID:959;KEGG:hsa:959;PIR:S28017;eggNOG:ENOG410IVYF;eggNOG:ENOG4111TET;UniGene:Hs.592244;GO:GO:0005174;GO:GO:0005615;GO:GO:0005622;GO:GO:0005886;GO:GO:0005887;GO:GO:0006954;GO:GO:0…
14470771	IL13 -- CD40LG	association	Pubmed 1997:9192766;	<b>Interleukin-13</b> in combination with <b>CD40 ligand</b> potently inhibits apoptosis in human B lymphocytes: upregulation of Bcl-xL and Mcl-1.[Pubmed 1997:9192766];	4342745	Gene	IL13	IL-13;IL13;interleukin 13;P600;il -13;il 13;il- 13;il-1 3;il1-3;interleukin-1 3;Interleukin-13;interleukin13;nc 30;nc-30;NC30;p 600;p-600;	SWISSPROT_AC:P35225;SWISSPROT_ID:IL13_HUMAN;GeneID:3596;Ensembl:ENSG00000169194;HGNC:HGNC:5973;MIM:147683;Vega:OTTHUMG00000059723;protein_accession:AAA36107.1;protein_accession:AAA83738.1;protein_accession:AAB01681.1;protein_accession:AAC03535.1;protein_accession:AAH96138.1;protein_accession:AAH96139.1;protein_accession:AAH96140.1;protein_accession:AAH96141.2;protein_accession:AAK53823.1;protein_…	4340589	Gene	CD40LG	CD154;CD40 ligand;CD40L;CD40LG;gp39;hCD40L;HIGM1;IGM;IMD3;T-BAM;TNFSF5;TRAP;cd 154;cd 40 l;cd 40 ligand;cd-40 ligand;cd-40-ligand;CD154 antigen;cd40 l;cd40 ligand--an;CD40-L;cd40-ligand;cd40l g;cd40l--an;higm type 1;higm-1;l-cd40;ligand cd40;ligand of cd40;ligand--cd40;ligand-cd40;t cell antigen gp39;T-cell antigen Gp39;TNF-related activation protein;Tumor necrosis factor ligand superfamily membe…	SWISSPROT_AC:P29965;SWISSPROT_ID:CD40L_HUMAN;GeneID:959;Ensembl:ENSG00000102245;HGNC:HGNC:11935;MIM:300386;Vega:OTTHUMG00000022512;protein_accession:AAA35662.1;protein_accession:AAC41932.1;protein_accession:AAD13982.1;protein_accession:AAH71754.1;protein_accession:AAH74950.1;protein_accession:AAP37943.1;protein_accession:AAQ09090.1;protein_accession:AAZ23548.1;protein_accession:ABK41936.1;protein…
15431169	IL15 -- FAS1	association	Pubmed 2000:10731928;	5) Fas expression was increased in HIV patients (70.2 +/- 4.6%) compared to HIV (-) donors (32.4 +/- 4.3%), and <b>IL-15</b> increased <b>Fas</b> expression by 8.4 +/- 1.2% in HIV (-) donors.[Pubmed 2000:10731928];	4342748	Gene	IL15	IL-15;IL15;interleukin 15;il -15;il 15;il i-v;il- 15;interleukin-1 5;Interleukin-15;interleukin15;	SWISSPROT_AC:P40933;SWISSPROT_ID:IL15_HUMAN;GeneID:3600;Ensembl:ENSG00000164136;HGNC:HGNC:5977;MIM:600554;Vega:OTTHUMG00000133418;protein_accession:AAA21551.1;protein_accession:AAB97518.1;protein_accession:AAD15004.1;protein_accession:AAH18149.1;protein_accession:AAI00962.1;protein_accession:AAI00963.1;protein_accession:AAI00964.1;protein_accession:AAU21241.1;protein_accession:ABM84635.1;protein_…	492563	Protein	FAS1	Apo-1 antigen;Apoptosis-mediating surface antigen FAS;APT1;CD95 antigen;FAS;FAS1;FASLG receptor;TNFRSF6;TNR6;Tumor necrosis factor receptor superfamily member 6;ALPS1A;antigen cd95;apo -i;apo 1;apo i;APO-1;apo-1-antigen;apo-i;apo-isoform i;cd 95;cd-95;cd9 5;CD95;cd95-antigen;cd95-type;cell death surface receptor fas;cell surface death receptor fas;cell surface fas death receptor;cell's surface de…	SWISSPROT_AC:P25445;SWISSPROT_ID:TNR6_HUMAN;EMBL:AK290978;EMBL:AL157394;EMBL:AY450925;EMBL:AY495076;EMBL:BC012479;EMBL:CH471066;EMBL:FM246458;EMBL:M67454;EMBL:X63717;EMBL:X83490;EMBL:X83491;EMBL:X83492;EMBL:X83493;EMBL:X89101;EMBL:Z47993;EMBL:Z47994;EMBL:Z47995;EMBL:Z66556;EMBL:Z70519;EMBL:Z70520;RefSeq:NP_000034.1;RefSeq:NP_001307548.1;RefSeq:NP_690610.1;RefSeq:NP_690611.1;ProteinModelPortal:P25…
15556371	CD40LG -- IL-15	association	Pubmed 2012:21788945;Pubmed 2000:10886401;	This cooperation between <b>IL-15</b> and <b>CD40L</b> reinforces the importance of tumor microenvironment and unravels a mechanism of FL growth that should be considered if using IL-15 as a drug in this disease.[Pubmed 2012:21788945];<b>IL-15</b> significantly increased the expression of <b>CD154</b> on SF and PB T cells from patients, whereas IL-2 had minimal effects.[Pubmed 2000:10886401];<b>I…	4340589	Gene	CD40LG	CD154;CD40 ligand;CD40L;CD40LG;gp39;hCD40L;HIGM1;IGM;IMD3;T-BAM;TNFSF5;TRAP;cd 154;cd 40 l;cd 40 ligand;cd-40 ligand;cd-40-ligand;CD154 antigen;cd40 l;cd40 ligand--an;CD40-L;cd40-ligand;cd40l g;cd40l--an;higm type 1;higm-1;l-cd40;ligand cd40;ligand of cd40;ligand--cd40;ligand-cd40;t cell antigen gp39;T-cell antigen Gp39;TNF-related activation protein;Tumor necrosis factor ligand superfamily membe…	SWISSPROT_AC:P29965;SWISSPROT_ID:CD40L_HUMAN;GeneID:959;Ensembl:ENSG00000102245;HGNC:HGNC:11935;MIM:300386;Vega:OTTHUMG00000022512;protein_accession:AAA35662.1;protein_accession:AAC41932.1;protein_accession:AAD13982.1;protein_accession:AAH71754.1;protein_accession:AAH74950.1;protein_accession:AAP37943.1;protein_accession:AAQ09090.1;protein_accession:AAZ23548.1;protein_accession:ABK41936.1;protein…	197294	Protein	IL-15	IL-15;IL15;Interleukin-15;il -15;il 15;il i-v;il- 15;interleukin 15;interleukin-1 5;interleukin15;	SWISSPROT_AC:P40933;SWISSPROT_ID:IL15_HUMAN;EMBL:AF031167;EMBL:AK122993;EMBL:AK290619;EMBL:AY720442;EMBL:BC018149;EMBL:BC100961;EMBL:BC100962;EMBL:BC100963;EMBL:CH471056;EMBL:CR541980;EMBL:CR542007;EMBL:U14407;EMBL:X91233;EMBL:X94222;EMBL:X94223;EMBL:Y09908;EMBL:Z38000;RefSeq:NP_000576.1;RefSeq:NP_751915.1;ProteinModelPortal:P40933;STRING:9606.ENSP00000296545;SWISSPROT_AC_OLD:D3DNZ2;SWISSPROT_AC_…
15556396	IL15 -- CD40L	association	Pubmed 2012:21788945;Pubmed 2000:10886401;	This cooperation between <b>IL-15</b> and <b>CD40L</b> reinforces the importance of tumor microenvironment and unravels a mechanism of FL growth that should be considered if using IL-15 as a drug in this disease.[Pubmed 2012:21788945];<b>IL-15</b> significantly increased the expression of <b>CD154</b> on SF and PB T cells from patients, whereas IL-2 had minimal effects.[Pubmed 2000:10886401];<b>I…	4342748	Gene	IL15	IL-15;IL15;interleukin 15;il -15;il 15;il i-v;il- 15;interleukin-1 5;Interleukin-15;interleukin15;	SWISSPROT_AC:P40933;SWISSPROT_ID:IL15_HUMAN;GeneID:3600;Ensembl:ENSG00000164136;HGNC:HGNC:5977;MIM:600554;Vega:OTTHUMG00000133418;protein_accession:AAA21551.1;protein_accession:AAB97518.1;protein_accession:AAD15004.1;protein_accession:AAH18149.1;protein_accession:AAI00962.1;protein_accession:AAI00963.1;protein_accession:AAI00964.1;protein_accession:AAU21241.1;protein_accession:ABM84635.1;protein_…	59248	Protein	CD40L	CD154 antigen;CD40 ligand;CD40-L;CD40L;CD40LG;T-cell antigen Gp39;TNF-related activation protein;TNFSF5;TRAP;Tumor necrosis factor ligand superfamily member 5;cd 154;cd 40 l;cd 40 ligand;cd-40 ligand;cd-40-ligand;CD154;cd40 l;cd40 ligand--an;cd40-ligand;cd40l g;cd40l--an;gp39;hCD40L;higm type 1;higm-1;HIGM1;IGM;IMD3;l-cd40;ligand cd40;ligand of cd40;ligand--cd40;ligand-cd40;t cell antigen gp39;T-…	SWISSPROT_AC:P29965;SWISSPROT_ID:CD40L_HUMAN;EMBL:BC071754;EMBL:BC074950;EMBL:D31797;EMBL:L07414;EMBL:X67878;EMBL:X68550;EMBL:Z15017;RefSeq:NP_000065.1;ProteinModelPortal:P29965;STRING:9606.ENSP00000359663;SMR:P29965;GeneID:959;KEGG:hsa:959;PIR:S28017;eggNOG:ENOG410IVYF;eggNOG:ENOG4111TET;UniGene:Hs.592244;GO:GO:0005174;GO:GO:0005615;GO:GO:0005622;GO:GO:0005886;GO:GO:0005887;GO:GO:0006954;GO:GO:0…
15556423	IL15 -- CD40LG	association	Pubmed 2012:21788945;Pubmed 2000:10886401;	This cooperation between <b>IL-15</b> and <b>CD40L</b> reinforces the importance of tumor microenvironment and unravels a mechanism of FL growth that should be considered if using IL-15 as a drug in this disease.[Pubmed 2012:21788945];<b>IL-15</b> significantly increased the expression of <b>CD154</b> on SF and PB T cells from patients, whereas IL-2 had minimal effects.[Pubmed 2000:10886401];<b>I…	4342748	Gene	IL15	IL-15;IL15;interleukin 15;il -15;il 15;il i-v;il- 15;interleukin-1 5;Interleukin-15;interleukin15;	SWISSPROT_AC:P40933;SWISSPROT_ID:IL15_HUMAN;GeneID:3600;Ensembl:ENSG00000164136;HGNC:HGNC:5977;MIM:600554;Vega:OTTHUMG00000133418;protein_accession:AAA21551.1;protein_accession:AAB97518.1;protein_accession:AAD15004.1;protein_accession:AAH18149.1;protein_accession:AAI00962.1;protein_accession:AAI00963.1;protein_accession:AAI00964.1;protein_accession:AAU21241.1;protein_accession:ABM84635.1;protein_…	4340589	Gene	CD40LG	CD154;CD40 ligand;CD40L;CD40LG;gp39;hCD40L;HIGM1;IGM;IMD3;T-BAM;TNFSF5;TRAP;cd 154;cd 40 l;cd 40 ligand;cd-40 ligand;cd-40-ligand;CD154 antigen;cd40 l;cd40 ligand--an;CD40-L;cd40-ligand;cd40l g;cd40l--an;higm type 1;higm-1;l-cd40;ligand cd40;ligand of cd40;ligand--cd40;ligand-cd40;t cell antigen gp39;T-cell antigen Gp39;TNF-related activation protein;Tumor necrosis factor ligand superfamily membe…	SWISSPROT_AC:P29965;SWISSPROT_ID:CD40L_HUMAN;GeneID:959;Ensembl:ENSG00000102245;HGNC:HGNC:11935;MIM:300386;Vega:OTTHUMG00000022512;protein_accession:AAA35662.1;protein_accession:AAC41932.1;protein_accession:AAD13982.1;protein_accession:AAH71754.1;protein_accession:AAH74950.1;protein_accession:AAP37943.1;protein_accession:AAQ09090.1;protein_accession:AAZ23548.1;protein_accession:ABK41936.1;protein…
16393912	IL13 -- IL-13	association	Pubmed 2002:12063528;	To address whether the Gln110 variant of <b>IL13</b> influences <b>IL-13</b> function, contributing to the pathogenesis of bronchial asthma, we studied the functional properties of the variant.[Pubmed 2002:12063528];Upregulation of <b>IL-13</b> concentration in vivo by the <b>IL13</b> variant associated with bronchial asthma.[Pubmed 2002:12063528];	4342745	Gene	IL13	IL-13;IL13;interleukin 13;P600;il -13;il 13;il- 13;il-1 3;il1-3;interleukin-1 3;Interleukin-13;interleukin13;nc 30;nc-30;NC30;p 600;p-600;	SWISSPROT_AC:P35225;SWISSPROT_ID:IL13_HUMAN;GeneID:3596;Ensembl:ENSG00000169194;HGNC:HGNC:5973;MIM:147683;Vega:OTTHUMG00000059723;protein_accession:AAA36107.1;protein_accession:AAA83738.1;protein_accession:AAB01681.1;protein_accession:AAC03535.1;protein_accession:AAH96138.1;protein_accession:AAH96139.1;protein_accession:AAH96140.1;protein_accession:AAH96141.2;protein_accession:AAK53823.1;protein_…	197279	Protein	IL-13	IL-13;IL13;Interleukin-13;NC30;il -13;il 13;il- 13;il-1 3;il1-3;interleukin 13;interleukin-1 3;interleukin13;nc 30;nc-30;p 600;p-600;P600;	SWISSPROT_AC:P35225;SWISSPROT_ID:IL13_HUMAN;EMBL:AC004039;EMBL:AF043334;EMBL:AF377331;EMBL:BC096139;EMBL:L06801;EMBL:U10307;EMBL:U31120;EMBL:X69079;RefSeq:NP_002179.2;ProteinModelPortal:P35225;STRING:9606.ENSP00000304915;SWISSPROT_AC_OLD:O43644;SWISSPROT_AC_OLD:Q4VB52;SWISSPROT_AC_OLD:Q9UDC7;SMR:P35225;GeneID:3596;KEGG:hsa:3596;PIR:I38060;eggNOG:ENOG410JCI3;eggNOG:ENOG4111BX2;UniGene:Hs.845;GO:GO…
19009725	IL15 -- TLR2	association	Pubmed 2007:17289161;	TLR4 augmented the stimulatory effect of <b>TLR2</b> on <b>IL-15</b>, possibly contributing to the maintenance of synovitis in patients with RA.[Pubmed 2007:17289161];	4342748	Gene	IL15	IL-15;IL15;interleukin 15;il -15;il 15;il i-v;il- 15;interleukin-1 5;Interleukin-15;interleukin15;	SWISSPROT_AC:P40933;SWISSPROT_ID:IL15_HUMAN;GeneID:3600;Ensembl:ENSG00000164136;HGNC:HGNC:5977;MIM:600554;Vega:OTTHUMG00000133418;protein_accession:AAA21551.1;protein_accession:AAB97518.1;protein_accession:AAD15004.1;protein_accession:AAH18149.1;protein_accession:AAI00962.1;protein_accession:AAI00963.1;protein_accession:AAI00964.1;protein_accession:AAU21241.1;protein_accession:ABM84635.1;protein_…	490593	Protein	TLR2	CD282 antigen;TIL4;TLR2;Toll-like receptor 2;Toll/interleukin-1 receptor-like protein 4;CD282;receptor 2-toll-like;toll like receptor 2;toll like receptor ii;toll like receptor-2;toll-like receptor -2;toll-like receptor type 2;toll-like receptor-2;toll-like receptor2;toll-like-receptor 2;toll-like-receptor-2;toll-like-receptor2;	SWISSPROT_AC:O60603;SWISSPROT_ID:TLR2_HUMAN;EMBL:AB445624;EMBL:AF051152;EMBL:AF502291;EMBL:BC033756;EMBL:CH471056;EMBL:DQ012265;EMBL:DQ012266;EMBL:DQ012267;EMBL:DQ012268;EMBL:DQ012269;EMBL:DQ012270;EMBL:DQ012271;EMBL:U88878;RefSeq:NP_001305716.1;RefSeq:NP_001305718.1;RefSeq:NP_001305719.1;RefSeq:NP_001305720.1;RefSeq:NP_001305722.1;RefSeq:NP_001305724.1;RefSeq:NP_001305725.1;RefSeq:NP_003255.2;Re…
20813617	CXCL10 -- TLR2	association	Pubmed 2011:21129050;Pubmed 2009:19447045;Pubmed 2016:27503209;Pubmed 2017:28327786;	In virus-induced acute asthma, levels of <b>IP-10</b> and IL-10 mRNA expression were correlated with the mRNA expression of <b>TLR2</b> and TLR3.[Pubmed 2011:21129050];Down-regulation of <b>TLR2</b> and TLR4 abrogates HG-induced <b>IP-10</b> release via NF-kappaB inhibition.[Pubmed 2009:19447045];<b>TLR2</b> Activation Limits Rhinovirus-Stimulated <b>CXCL-10</b> by Attenuating IRAK-1-Dependent IL…	4342770	Gene	CXCL10	C-X-C motif chemokine ligand 10;C7;crg-2;CXCL10;gIP-10;IFI10;INP10;IP-10;mob-1;SCYB10;10 kDa interferon gamma-induced protein;10-kda interferon gamma-induced protein;C-X-C motif chemokine 10;c-x-c motif ligand 10 chemokine;c-x-c-motif chemokine 10;chemokine c-x-c motif ligand 10;chemokine c-x-c-motif ligand 10;cxcl 10;cxcl-10;CXL10;gamma ip-10;gamma-ip-10;Gamma-IP10;gammaip-10;ip 10;ip- 10;ip--10…	SWISSPROT_AC:P02778;SWISSPROT_ID:CXL10_HUMAN;GeneID:3627;Ensembl:ENSG00000169245;HGNC:HGNC:10637;MIM:147310;Vega:OTTHUMG00000160887;protein_accession:AAH10954.1;protein_accession:ABM83712.1;protein_accession:ABM87032.1;protein_accession:CAA26370.1;protein_accession:EAX05772.1;protein_accession:EAX05773.1;protein_accession:NP_001556.2;protein_accession:P02778.2;protein_gi:119626177;protein_gi:1196…	490593	Protein	TLR2	CD282 antigen;TIL4;TLR2;Toll-like receptor 2;Toll/interleukin-1 receptor-like protein 4;CD282;receptor 2-toll-like;toll like receptor 2;toll like receptor ii;toll like receptor-2;toll-like receptor -2;toll-like receptor type 2;toll-like receptor-2;toll-like receptor2;toll-like-receptor 2;toll-like-receptor-2;toll-like-receptor2;	SWISSPROT_AC:O60603;SWISSPROT_ID:TLR2_HUMAN;EMBL:AB445624;EMBL:AF051152;EMBL:AF502291;EMBL:BC033756;EMBL:CH471056;EMBL:DQ012265;EMBL:DQ012266;EMBL:DQ012267;EMBL:DQ012268;EMBL:DQ012269;EMBL:DQ012270;EMBL:DQ012271;EMBL:U88878;RefSeq:NP_001305716.1;RefSeq:NP_001305718.1;RefSeq:NP_001305719.1;RefSeq:NP_001305720.1;RefSeq:NP_001305722.1;RefSeq:NP_001305724.1;RefSeq:NP_001305725.1;RefSeq:NP_003255.2;Re…
20823061	APP -- CD40L	association	Pubmed 2009:19422822;	Recently, we showed that <b>CD40L</b> stimulation could increase <b>Abeta</b> levels via NFkappaB signaling, presumably through TRAFs.[Pubmed 2009:19422822];	4340093	Gene	APP	AAA;ABETA;ABPP;AD1;amyloid beta precursor protein;APP;APPI;CTFgamma;CVAP;PN-II;PN2;A4;aaa-type;Alzheimer disease amyloid protein;alzheimer's disease amyloid protein;amyloid b precursor protein;amyloid b protein precursor;amyloid b-protein precursor;Amyloid beta A4 protein;amyloid beta protein a4;amyloid beta- protein precursor;amyloid beta-a4 protein;amyloid beta-protein precursor;Amyloid precurs…	SWISSPROT_AC:P05067;SWISSPROT_ID:A4_HUMAN;GeneID:351;Ensembl:ENSG00000142192;HGNC:HGNC:620;MIM:104760;Vega:OTTHUMG00000078438;protein_accession:AAA35540.1;protein_accession:AAA51564.1;protein_accession:AAA51722.1;protein_accession:AAA51726.1;protein_accession:AAA51727.1;protein_accession:AAA51768.1;protein_accession:AAA58727.1;protein_accession:AAA60163.1;protein_accession:AAB19991.1;protein_acce…	59248	Protein	CD40L	CD154 antigen;CD40 ligand;CD40-L;CD40L;CD40LG;T-cell antigen Gp39;TNF-related activation protein;TNFSF5;TRAP;Tumor necrosis factor ligand superfamily member 5;cd 154;cd 40 l;cd 40 ligand;cd-40 ligand;cd-40-ligand;CD154;cd40 l;cd40 ligand--an;cd40-ligand;cd40l g;cd40l--an;gp39;hCD40L;higm type 1;higm-1;HIGM1;IGM;IMD3;l-cd40;ligand cd40;ligand of cd40;ligand--cd40;ligand-cd40;t cell antigen gp39;T-…	SWISSPROT_AC:P29965;SWISSPROT_ID:CD40L_HUMAN;EMBL:BC071754;EMBL:BC074950;EMBL:D31797;EMBL:L07414;EMBL:X67878;EMBL:X68550;EMBL:Z15017;RefSeq:NP_000065.1;ProteinModelPortal:P29965;STRING:9606.ENSP00000359663;SMR:P29965;GeneID:959;KEGG:hsa:959;PIR:S28017;eggNOG:ENOG410IVYF;eggNOG:ENOG4111TET;UniGene:Hs.592244;GO:GO:0005174;GO:GO:0005615;GO:GO:0005622;GO:GO:0005886;GO:GO:0005887;GO:GO:0006954;GO:GO:0…
20823194	CD40LG -- APP	association	Pubmed 2009:19422822;	Recently, we showed that <b>CD40L</b> stimulation could increase <b>Abeta</b> levels via NFkappaB signaling, presumably through TRAFs.[Pubmed 2009:19422822];	4340589	Gene	CD40LG	CD154;CD40 ligand;CD40L;CD40LG;gp39;hCD40L;HIGM1;IGM;IMD3;T-BAM;TNFSF5;TRAP;cd 154;cd 40 l;cd 40 ligand;cd-40 ligand;cd-40-ligand;CD154 antigen;cd40 l;cd40 ligand--an;CD40-L;cd40-ligand;cd40l g;cd40l--an;higm type 1;higm-1;l-cd40;ligand cd40;ligand of cd40;ligand--cd40;ligand-cd40;t cell antigen gp39;T-cell antigen Gp39;TNF-related activation protein;Tumor necrosis factor ligand superfamily membe…	SWISSPROT_AC:P29965;SWISSPROT_ID:CD40L_HUMAN;GeneID:959;Ensembl:ENSG00000102245;HGNC:HGNC:11935;MIM:300386;Vega:OTTHUMG00000022512;protein_accession:AAA35662.1;protein_accession:AAC41932.1;protein_accession:AAD13982.1;protein_accession:AAH71754.1;protein_accession:AAH74950.1;protein_accession:AAP37943.1;protein_accession:AAQ09090.1;protein_accession:AAZ23548.1;protein_accession:ABK41936.1;protein…	3186	Protein	APP	A4;ABPP;AD1;Alzheimer disease amyloid protein;Amyloid beta A4 protein;Amyloid precursor protein;APP;APPI;Beta-amyloid precursor protein;Cerebral vascular amyloid peptide;CVAP;PN-II;PreA4;Protease nexin-II;AAA;aaa-type;ABETA;alzheimer's disease amyloid protein;amyloid b precursor protein;amyloid b protein precursor;amyloid b-protein precursor;amyloid beta precursor protein;amyloid beta protein a4;…	SWISSPROT_AC:P05067;SWISSPROT_ID:A4_HUMAN;EMBL:AB066441;EMBL:AF282245;EMBL:AK295621;EMBL:AK312326;EMBL:AP001439;EMBL:AP001440;EMBL:AP001441;EMBL:AP001442;EMBL:AP001443;EMBL:AY919674;EMBL:BC004369;EMBL:BC065529;EMBL:CH471079;EMBL:D87675;EMBL:M15532;EMBL:M15533;EMBL:M16765;EMBL:M18734;EMBL:M24546;EMBL:M24547;EMBL:M28373;EMBL:M29269;EMBL:M29270;EMBL:M33112;EMBL:M34862;EMBL:M34863;EMBL:M34864;EMBL:M3…
20823266	CD40LG -- APP	association	Pubmed 2009:19422822;	Recently, we showed that <b>CD40L</b> stimulation could increase <b>Abeta</b> levels via NFkappaB signaling, presumably through TRAFs.[Pubmed 2009:19422822];	4340589	Gene	CD40LG	CD154;CD40 ligand;CD40L;CD40LG;gp39;hCD40L;HIGM1;IGM;IMD3;T-BAM;TNFSF5;TRAP;cd 154;cd 40 l;cd 40 ligand;cd-40 ligand;cd-40-ligand;CD154 antigen;cd40 l;cd40 ligand--an;CD40-L;cd40-ligand;cd40l g;cd40l--an;higm type 1;higm-1;l-cd40;ligand cd40;ligand of cd40;ligand--cd40;ligand-cd40;t cell antigen gp39;T-cell antigen Gp39;TNF-related activation protein;Tumor necrosis factor ligand superfamily membe…	SWISSPROT_AC:P29965;SWISSPROT_ID:CD40L_HUMAN;GeneID:959;Ensembl:ENSG00000102245;HGNC:HGNC:11935;MIM:300386;Vega:OTTHUMG00000022512;protein_accession:AAA35662.1;protein_accession:AAC41932.1;protein_accession:AAD13982.1;protein_accession:AAH71754.1;protein_accession:AAH74950.1;protein_accession:AAP37943.1;protein_accession:AAQ09090.1;protein_accession:AAZ23548.1;protein_accession:ABK41936.1;protein…	4340093	Gene	APP	AAA;ABETA;ABPP;AD1;amyloid beta precursor protein;APP;APPI;CTFgamma;CVAP;PN-II;PN2;A4;aaa-type;Alzheimer disease amyloid protein;alzheimer's disease amyloid protein;amyloid b precursor protein;amyloid b protein precursor;amyloid b-protein precursor;Amyloid beta A4 protein;amyloid beta protein a4;amyloid beta- protein precursor;amyloid beta-a4 protein;amyloid beta-protein precursor;Amyloid precurs…	SWISSPROT_AC:P05067;SWISSPROT_ID:A4_HUMAN;GeneID:351;Ensembl:ENSG00000142192;HGNC:HGNC:620;MIM:104760;Vega:OTTHUMG00000078438;protein_accession:AAA35540.1;protein_accession:AAA51564.1;protein_accession:AAA51722.1;protein_accession:AAA51726.1;protein_accession:AAA51727.1;protein_accession:AAA51768.1;protein_accession:AAA58727.1;protein_accession:AAA60163.1;protein_accession:AAB19991.1;protein_acce…
20848136	STAT3 -- STAT3	association	Pubmed 2009:19190525;	Further understanding of how <b>STAT3</b> results in the diverse manifestations of <b>HIES</b> will allow us to develop more specific therapies for HIES as well as for many of the manifestations, such as scoliosis, recurrent staphylococcal infections, and eczema, which are common in the general population.[Pubmed 2009:19190525];	4345290	Gene	STAT3	ADMIO;ADMIO1;APRF;HIES;signal transducer and activator of transcription 3;STAT3;acute phase response factor;Acute-phase response factor;acute-phase response of factor;stat 3;stat-3;	SWISSPROT_AC:P40763;SWISSPROT_ID:STAT3_HUMAN;GeneID:6774;Ensembl:ENSG00000168610;HGNC:HGNC:11364;MIM:102582;Vega:OTTHUMG00000150645;protein_accession:AAA58374.1;protein_accession:AAB84254.1;protein_accession:AAH00627.1;protein_accession:AAH14482.1;protein_accession:AAK17196.1;protein_accession:AAS66986.1;protein_accession:ABZ92186.1;protein_accession:ACE86450.1;protein_accession:ACE87126.1;protei…	461696	Protein	STAT3	Acute-phase response factor;APRF;Signal transducer and activator of transcription 3;STAT3;acute phase response factor;acute-phase response of factor;ADMIO;ADMIO1;HIES;stat 3;stat-3;	SWISSPROT_AC:P40763;SWISSPROT_ID:STAT3_HUMAN;EMBL:AC087691;EMBL:AF029311;EMBL:AJ012463;EMBL:AK291933;EMBL:AY572796;EMBL:BC000627;EMBL:BC014482;EMBL:CH471152;EMBL:JB252046;EMBL:L29277;RefSeq:NP_003141.2;RefSeq:NP_644805.1;RefSeq:NP_998827.1;RefSeq:XP_005257673.2;RefSeq:XP_005257674.2;RefSeq:XP_011523447.1;RefSeq:XP_011523448.1;RefSeq:XP_016880461.1;RefSeq:XP_016880464.1;ProteinModelPortal:P40763;S…
23152881	IL-15 -- IL-13	association	Pubmed 2012:22487676;	Tissue levels of IL-4 and <b>IL-13</b> were increased in moderate/severe persistent allergic nasal mucosa whereas <b>IL-15</b> and IFN-Î³ were decreased in moderate/severe persistent allergic nasal mucosa.[Pubmed 2012:22487676];Tissue levels of IL-4 and <b>IL-13</b> were increased in moderate/severe persistent allergic nasal mucosa whereas <b>IL-15</b> and IFN-ÃÂ³ were decreased in moderate/seve…	197294	Protein	IL-15	IL-15;IL15;Interleukin-15;il -15;il 15;il i-v;il- 15;interleukin 15;interleukin-1 5;interleukin15;	SWISSPROT_AC:P40933;SWISSPROT_ID:IL15_HUMAN;EMBL:AF031167;EMBL:AK122993;EMBL:AK290619;EMBL:AY720442;EMBL:BC018149;EMBL:BC100961;EMBL:BC100962;EMBL:BC100963;EMBL:CH471056;EMBL:CR541980;EMBL:CR542007;EMBL:U14407;EMBL:X91233;EMBL:X94222;EMBL:X94223;EMBL:Y09908;EMBL:Z38000;RefSeq:NP_000576.1;RefSeq:NP_751915.1;ProteinModelPortal:P40933;STRING:9606.ENSP00000296545;SWISSPROT_AC_OLD:D3DNZ2;SWISSPROT_AC_…	197279	Protein	IL-13	IL-13;IL13;Interleukin-13;NC30;il -13;il 13;il- 13;il-1 3;il1-3;interleukin 13;interleukin-1 3;interleukin13;nc 30;nc-30;p 600;p-600;P600;	SWISSPROT_AC:P35225;SWISSPROT_ID:IL13_HUMAN;EMBL:AC004039;EMBL:AF043334;EMBL:AF377331;EMBL:BC096139;EMBL:L06801;EMBL:U10307;EMBL:U31120;EMBL:X69079;RefSeq:NP_002179.2;ProteinModelPortal:P35225;STRING:9606.ENSP00000304915;SWISSPROT_AC_OLD:O43644;SWISSPROT_AC_OLD:Q4VB52;SWISSPROT_AC_OLD:Q9UDC7;SMR:P35225;GeneID:3596;KEGG:hsa:3596;PIR:I38060;eggNOG:ENOG410JCI3;eggNOG:ENOG4111BX2;UniGene:Hs.845;GO:GO…
23152922	IL15 -- IL-13	association	Pubmed 2012:22487676;	Tissue levels of IL-4 and <b>IL-13</b> were increased in moderate/severe persistent allergic nasal mucosa whereas <b>IL-15</b> and IFN-Î³ were decreased in moderate/severe persistent allergic nasal mucosa.[Pubmed 2012:22487676];Tissue levels of IL-4 and <b>IL-13</b> were increased in moderate/severe persistent allergic nasal mucosa whereas <b>IL-15</b> and IFN-ÃÂ³ were decreased in moderate/seve…	4342748	Gene	IL15	IL-15;IL15;interleukin 15;il -15;il 15;il i-v;il- 15;interleukin-1 5;Interleukin-15;interleukin15;	SWISSPROT_AC:P40933;SWISSPROT_ID:IL15_HUMAN;GeneID:3600;Ensembl:ENSG00000164136;HGNC:HGNC:5977;MIM:600554;Vega:OTTHUMG00000133418;protein_accession:AAA21551.1;protein_accession:AAB97518.1;protein_accession:AAD15004.1;protein_accession:AAH18149.1;protein_accession:AAI00962.1;protein_accession:AAI00963.1;protein_accession:AAI00964.1;protein_accession:AAU21241.1;protein_accession:ABM84635.1;protein_…	197279	Protein	IL-13	IL-13;IL13;Interleukin-13;NC30;il -13;il 13;il- 13;il-1 3;il1-3;interleukin 13;interleukin-1 3;interleukin13;nc 30;nc-30;p 600;p-600;P600;	SWISSPROT_AC:P35225;SWISSPROT_ID:IL13_HUMAN;EMBL:AC004039;EMBL:AF043334;EMBL:AF377331;EMBL:BC096139;EMBL:L06801;EMBL:U10307;EMBL:U31120;EMBL:X69079;RefSeq:NP_002179.2;ProteinModelPortal:P35225;STRING:9606.ENSP00000304915;SWISSPROT_AC_OLD:O43644;SWISSPROT_AC_OLD:Q4VB52;SWISSPROT_AC_OLD:Q9UDC7;SMR:P35225;GeneID:3596;KEGG:hsa:3596;PIR:I38060;eggNOG:ENOG410JCI3;eggNOG:ENOG4111BX2;UniGene:Hs.845;GO:GO…
23153525	CXCL10 -- STAT3	association	Pubmed 2012:22479586;	Then, we further determined the mechanisms how <b>STAT3</b> regulates HO-1 and <b>CXCL10</b> as well as mutual regulation among them in CRL-2581, a murine endothelial cell line.[Pubmed 2012:22479586];	4342770	Gene	CXCL10	C-X-C motif chemokine ligand 10;C7;crg-2;CXCL10;gIP-10;IFI10;INP10;IP-10;mob-1;SCYB10;10 kDa interferon gamma-induced protein;10-kda interferon gamma-induced protein;C-X-C motif chemokine 10;c-x-c motif ligand 10 chemokine;c-x-c-motif chemokine 10;chemokine c-x-c motif ligand 10;chemokine c-x-c-motif ligand 10;cxcl 10;cxcl-10;CXL10;gamma ip-10;gamma-ip-10;Gamma-IP10;gammaip-10;ip 10;ip- 10;ip--10…	SWISSPROT_AC:P02778;SWISSPROT_ID:CXL10_HUMAN;GeneID:3627;Ensembl:ENSG00000169245;HGNC:HGNC:10637;MIM:147310;Vega:OTTHUMG00000160887;protein_accession:AAH10954.1;protein_accession:ABM83712.1;protein_accession:ABM87032.1;protein_accession:CAA26370.1;protein_accession:EAX05772.1;protein_accession:EAX05773.1;protein_accession:NP_001556.2;protein_accession:P02778.2;protein_gi:119626177;protein_gi:1196…	461696	Protein	STAT3	Acute-phase response factor;APRF;Signal transducer and activator of transcription 3;STAT3;acute phase response factor;acute-phase response of factor;ADMIO;ADMIO1;HIES;stat 3;stat-3;	SWISSPROT_AC:P40763;SWISSPROT_ID:STAT3_HUMAN;EMBL:AC087691;EMBL:AF029311;EMBL:AJ012463;EMBL:AK291933;EMBL:AY572796;EMBL:BC000627;EMBL:BC014482;EMBL:CH471152;EMBL:JB252046;EMBL:L29277;RefSeq:NP_003141.2;RefSeq:NP_644805.1;RefSeq:NP_998827.1;RefSeq:XP_005257673.2;RefSeq:XP_005257674.2;RefSeq:XP_011523447.1;RefSeq:XP_011523448.1;RefSeq:XP_016880461.1;RefSeq:XP_016880464.1;ProteinModelPortal:P40763;S…
23342984	STAT3 -- TLR2	association	Pubmed 2012:22417709;	<b>TLR2</b> ligation induces the production of IL-23/IL-17 via IL-6, <b>STAT3</b> and NF-kB pathway in patients with primary Sjogren's syndrome.[Pubmed 2012:22417709];Our data demonstrate that <b>TLR2</b> ligation induces the production of IL-23/IL-17 via IL-6, <b>STAT3</b> and NF-kB pathway in pSS.[Pubmed 2012:22417709];	4345290	Gene	STAT3	ADMIO;ADMIO1;APRF;HIES;signal transducer and activator of transcription 3;STAT3;acute phase response factor;Acute-phase response factor;acute-phase response of factor;stat 3;stat-3;	SWISSPROT_AC:P40763;SWISSPROT_ID:STAT3_HUMAN;GeneID:6774;Ensembl:ENSG00000168610;HGNC:HGNC:11364;MIM:102582;Vega:OTTHUMG00000150645;protein_accession:AAA58374.1;protein_accession:AAB84254.1;protein_accession:AAH00627.1;protein_accession:AAH14482.1;protein_accession:AAK17196.1;protein_accession:AAS66986.1;protein_accession:ABZ92186.1;protein_accession:ACE86450.1;protein_accession:ACE87126.1;protei…	490593	Protein	TLR2	CD282 antigen;TIL4;TLR2;Toll-like receptor 2;Toll/interleukin-1 receptor-like protein 4;CD282;receptor 2-toll-like;toll like receptor 2;toll like receptor ii;toll like receptor-2;toll-like receptor -2;toll-like receptor type 2;toll-like receptor-2;toll-like receptor2;toll-like-receptor 2;toll-like-receptor-2;toll-like-receptor2;	SWISSPROT_AC:O60603;SWISSPROT_ID:TLR2_HUMAN;EMBL:AB445624;EMBL:AF051152;EMBL:AF502291;EMBL:BC033756;EMBL:CH471056;EMBL:DQ012265;EMBL:DQ012266;EMBL:DQ012267;EMBL:DQ012268;EMBL:DQ012269;EMBL:DQ012270;EMBL:DQ012271;EMBL:U88878;RefSeq:NP_001305716.1;RefSeq:NP_001305718.1;RefSeq:NP_001305719.1;RefSeq:NP_001305720.1;RefSeq:NP_001305722.1;RefSeq:NP_001305724.1;RefSeq:NP_001305725.1;RefSeq:NP_003255.2;Re…
25184147	IL15 -- STAT3	association	Pubmed 2014:24621498;	(2) anti-IL-15 antibody blocks <b>STAT3</b> activation induced by exogenous <b>IL-15</b> in non-malignant MF T cells, whereas the spontaneous STAT3 activation and IL-17F expression in malignant T cells is not inhibited;[Pubmed 2014:24621498];	4342748	Gene	IL15	IL-15;IL15;interleukin 15;il -15;il 15;il i-v;il- 15;interleukin-1 5;Interleukin-15;interleukin15;	SWISSPROT_AC:P40933;SWISSPROT_ID:IL15_HUMAN;GeneID:3600;Ensembl:ENSG00000164136;HGNC:HGNC:5977;MIM:600554;Vega:OTTHUMG00000133418;protein_accession:AAA21551.1;protein_accession:AAB97518.1;protein_accession:AAD15004.1;protein_accession:AAH18149.1;protein_accession:AAI00962.1;protein_accession:AAI00963.1;protein_accession:AAI00964.1;protein_accession:AAU21241.1;protein_accession:ABM84635.1;protein_…	461696	Protein	STAT3	Acute-phase response factor;APRF;Signal transducer and activator of transcription 3;STAT3;acute phase response factor;acute-phase response of factor;ADMIO;ADMIO1;HIES;stat 3;stat-3;	SWISSPROT_AC:P40763;SWISSPROT_ID:STAT3_HUMAN;EMBL:AC087691;EMBL:AF029311;EMBL:AJ012463;EMBL:AK291933;EMBL:AY572796;EMBL:BC000627;EMBL:BC014482;EMBL:CH471152;EMBL:JB252046;EMBL:L29277;RefSeq:NP_003141.2;RefSeq:NP_644805.1;RefSeq:NP_998827.1;RefSeq:XP_005257673.2;RefSeq:XP_005257674.2;RefSeq:XP_011523447.1;RefSeq:XP_011523448.1;RefSeq:XP_016880461.1;RefSeq:XP_016880464.1;ProteinModelPortal:P40763;S…
25188733	IL15 -- IP-10	association	Pubmed 2014:24586509;	Moreover, the <b>CXCL10</b> expression in intestinal tissues was upregulated by poly I:C and <b>IL-15</b>.[Pubmed 2014:24586509];	4342748	Gene	IL15	IL-15;IL15;interleukin 15;il -15;il 15;il i-v;il- 15;interleukin-1 5;Interleukin-15;interleukin15;	SWISSPROT_AC:P40933;SWISSPROT_ID:IL15_HUMAN;GeneID:3600;Ensembl:ENSG00000164136;HGNC:HGNC:5977;MIM:600554;Vega:OTTHUMG00000133418;protein_accession:AAA21551.1;protein_accession:AAB97518.1;protein_accession:AAD15004.1;protein_accession:AAH18149.1;protein_accession:AAI00962.1;protein_accession:AAI00963.1;protein_accession:AAI00964.1;protein_accession:AAU21241.1;protein_accession:ABM84635.1;protein_…	86038	Protein	IP-10	10 kDa interferon gamma-induced protein;C-X-C motif chemokine 10;CXCL10;CXL10;Gamma-IP10;INP10;IP-10;SCYB10;Small-inducible cytokine B10;10-kda interferon gamma-induced protein;C-X-C motif chemokine ligand 10;c-x-c motif ligand 10 chemokine;c-x-c-motif chemokine 10;C7;chemokine c-x-c motif ligand 10;chemokine c-x-c-motif ligand 10;crg-2;cxcl 10;cxcl-10;gamma ip-10;gamma-ip-10;gammaip-10;gIP-10;IF…	SWISSPROT_AC:P02778;SWISSPROT_ID:CXL10_HUMAN;EMBL:BC010954;EMBL:X02530;RefSeq:NP_001556.2;ProteinModelPortal:P02778;STRING:9606.ENSP00000305651;SWISSPROT_AC_OLD:Q96QJ5;SMR:P02778;GeneID:3627;KEGG:hsa:3627;PIR:A03243;eggNOG:ENOG410J1VC;eggNOG:ENOG410ZTJK;UniGene:Hs.632586;GO:GO:0005102;GO:GO:0005576;GO:GO:0005615;GO:GO:0006935;GO:GO:0006954;GO:GO:0006955;GO:GO:0007165;GO:GO:0007166;GO:GO:0007186;G…
25188792	CXCL10 -- IL-15	association	Pubmed 2014:24586509;	Moreover, the <b>CXCL10</b> expression in intestinal tissues was upregulated by poly I:C and <b>IL-15</b>.[Pubmed 2014:24586509];	4342770	Gene	CXCL10	C-X-C motif chemokine ligand 10;C7;crg-2;CXCL10;gIP-10;IFI10;INP10;IP-10;mob-1;SCYB10;10 kDa interferon gamma-induced protein;10-kda interferon gamma-induced protein;C-X-C motif chemokine 10;c-x-c motif ligand 10 chemokine;c-x-c-motif chemokine 10;chemokine c-x-c motif ligand 10;chemokine c-x-c-motif ligand 10;cxcl 10;cxcl-10;CXL10;gamma ip-10;gamma-ip-10;Gamma-IP10;gammaip-10;ip 10;ip- 10;ip--10…	SWISSPROT_AC:P02778;SWISSPROT_ID:CXL10_HUMAN;GeneID:3627;Ensembl:ENSG00000169245;HGNC:HGNC:10637;MIM:147310;Vega:OTTHUMG00000160887;protein_accession:AAH10954.1;protein_accession:ABM83712.1;protein_accession:ABM87032.1;protein_accession:CAA26370.1;protein_accession:EAX05772.1;protein_accession:EAX05773.1;protein_accession:NP_001556.2;protein_accession:P02778.2;protein_gi:119626177;protein_gi:1196…	197294	Protein	IL-15	IL-15;IL15;Interleukin-15;il -15;il 15;il i-v;il- 15;interleukin 15;interleukin-1 5;interleukin15;	SWISSPROT_AC:P40933;SWISSPROT_ID:IL15_HUMAN;EMBL:AF031167;EMBL:AK122993;EMBL:AK290619;EMBL:AY720442;EMBL:BC018149;EMBL:BC100961;EMBL:BC100962;EMBL:BC100963;EMBL:CH471056;EMBL:CR541980;EMBL:CR542007;EMBL:U14407;EMBL:X91233;EMBL:X94222;EMBL:X94223;EMBL:Y09908;EMBL:Z38000;RefSeq:NP_000576.1;RefSeq:NP_751915.1;ProteinModelPortal:P40933;STRING:9606.ENSP00000296545;SWISSPROT_AC_OLD:D3DNZ2;SWISSPROT_AC_…
25188855	CXCL10 -- IL15	association	Pubmed 2014:24586509;	Moreover, the <b>CXCL10</b> expression in intestinal tissues was upregulated by poly I:C and <b>IL-15</b>.[Pubmed 2014:24586509];	4342770	Gene	CXCL10	C-X-C motif chemokine ligand 10;C7;crg-2;CXCL10;gIP-10;IFI10;INP10;IP-10;mob-1;SCYB10;10 kDa interferon gamma-induced protein;10-kda interferon gamma-induced protein;C-X-C motif chemokine 10;c-x-c motif ligand 10 chemokine;c-x-c-motif chemokine 10;chemokine c-x-c motif ligand 10;chemokine c-x-c-motif ligand 10;cxcl 10;cxcl-10;CXL10;gamma ip-10;gamma-ip-10;Gamma-IP10;gammaip-10;ip 10;ip- 10;ip--10…	SWISSPROT_AC:P02778;SWISSPROT_ID:CXL10_HUMAN;GeneID:3627;Ensembl:ENSG00000169245;HGNC:HGNC:10637;MIM:147310;Vega:OTTHUMG00000160887;protein_accession:AAH10954.1;protein_accession:ABM83712.1;protein_accession:ABM87032.1;protein_accession:CAA26370.1;protein_accession:EAX05772.1;protein_accession:EAX05773.1;protein_accession:NP_001556.2;protein_accession:P02778.2;protein_gi:119626177;protein_gi:1196…	4342748	Gene	IL15	IL-15;IL15;interleukin 15;il -15;il 15;il i-v;il- 15;interleukin-1 5;Interleukin-15;interleukin15;	SWISSPROT_AC:P40933;SWISSPROT_ID:IL15_HUMAN;GeneID:3600;Ensembl:ENSG00000164136;HGNC:HGNC:5977;MIM:600554;Vega:OTTHUMG00000133418;protein_accession:AAA21551.1;protein_accession:AAB97518.1;protein_accession:AAD15004.1;protein_accession:AAH18149.1;protein_accession:AAI00962.1;protein_accession:AAI00963.1;protein_accession:AAI00964.1;protein_accession:AAU21241.1;protein_accession:ABM84635.1;protein_…
44889027	APP -<> APP	expression regulation	Pubmed 1999:10320740;	To determine the presence and distribution of cerebrovascular <b>Abeta</b> production we investigated <b>amyloid beta precursor protein</b> (AbetaPP)-mRNA expression by RNA in situ hybridization in patients with hereditary cerebral hemorrhage with amyloidosis, Dutch type, Alzheimer disease and controls.[Pubmed 1999:10320740];	3186	Protein	APP	A4;ABPP;AD1;Alzheimer disease amyloid protein;Amyloid beta A4 protein;Amyloid precursor protein;APP;APPI;Beta-amyloid precursor protein;Cerebral vascular amyloid peptide;CVAP;PN-II;PreA4;Protease nexin-II;AAA;aaa-type;ABETA;alzheimer's disease amyloid protein;amyloid b precursor protein;amyloid b protein precursor;amyloid b-protein precursor;amyloid beta precursor protein;amyloid beta protein a4;…	SWISSPROT_AC:P05067;SWISSPROT_ID:A4_HUMAN;EMBL:AB066441;EMBL:AF282245;EMBL:AK295621;EMBL:AK312326;EMBL:AP001439;EMBL:AP001440;EMBL:AP001441;EMBL:AP001442;EMBL:AP001443;EMBL:AY919674;EMBL:BC004369;EMBL:BC065529;EMBL:CH471079;EMBL:D87675;EMBL:M15532;EMBL:M15533;EMBL:M16765;EMBL:M18734;EMBL:M24546;EMBL:M24547;EMBL:M28373;EMBL:M29269;EMBL:M29270;EMBL:M33112;EMBL:M34862;EMBL:M34863;EMBL:M34864;EMBL:M3…	4340093	Gene	APP	AAA;ABETA;ABPP;AD1;amyloid beta precursor protein;APP;APPI;CTFgamma;CVAP;PN-II;PN2;A4;aaa-type;Alzheimer disease amyloid protein;alzheimer's disease amyloid protein;amyloid b precursor protein;amyloid b protein precursor;amyloid b-protein precursor;Amyloid beta A4 protein;amyloid beta protein a4;amyloid beta- protein precursor;amyloid beta-a4 protein;amyloid beta-protein precursor;Amyloid precurs…	SWISSPROT_AC:P05067;SWISSPROT_ID:A4_HUMAN;GeneID:351;Ensembl:ENSG00000142192;HGNC:HGNC:620;MIM:104760;Vega:OTTHUMG00000078438;protein_accession:AAA35540.1;protein_accession:AAA51564.1;protein_accession:AAA51722.1;protein_accession:AAA51726.1;protein_accession:AAA51727.1;protein_accession:AAA51768.1;protein_accession:AAA58727.1;protein_accession:AAA60163.1;protein_accession:AAB19991.1;protein_acce…
44890911	IL-15 -<> CD40LG	expression regulation	Pubmed 2000:10886401;	<b>IL-15</b> significantly increased the expression of <b>CD154</b> on SF and PB T cells from patients, whereas IL-2 had minimal effects.[Pubmed 2000:10886401];<b>Interleukin-15</b> up-regulates the expression of <b>CD154</b> on synovial fluid T cells.[Pubmed 2000:10886401];	197294	Protein	IL-15	IL-15;IL15;Interleukin-15;il -15;il 15;il i-v;il- 15;interleukin 15;interleukin-1 5;interleukin15;	SWISSPROT_AC:P40933;SWISSPROT_ID:IL15_HUMAN;EMBL:AF031167;EMBL:AK122993;EMBL:AK290619;EMBL:AY720442;EMBL:BC018149;EMBL:BC100961;EMBL:BC100962;EMBL:BC100963;EMBL:CH471056;EMBL:CR541980;EMBL:CR542007;EMBL:U14407;EMBL:X91233;EMBL:X94222;EMBL:X94223;EMBL:Y09908;EMBL:Z38000;RefSeq:NP_000576.1;RefSeq:NP_751915.1;ProteinModelPortal:P40933;STRING:9606.ENSP00000296545;SWISSPROT_AC_OLD:D3DNZ2;SWISSPROT_AC_…	4340589	Gene	CD40LG	CD154;CD40 ligand;CD40L;CD40LG;gp39;hCD40L;HIGM1;IGM;IMD3;T-BAM;TNFSF5;TRAP;cd 154;cd 40 l;cd 40 ligand;cd-40 ligand;cd-40-ligand;CD154 antigen;cd40 l;cd40 ligand--an;CD40-L;cd40-ligand;cd40l g;cd40l--an;higm type 1;higm-1;l-cd40;ligand cd40;ligand of cd40;ligand--cd40;ligand-cd40;t cell antigen gp39;T-cell antigen Gp39;TNF-related activation protein;Tumor necrosis factor ligand superfamily membe…	SWISSPROT_AC:P29965;SWISSPROT_ID:CD40L_HUMAN;GeneID:959;Ensembl:ENSG00000102245;HGNC:HGNC:11935;MIM:300386;Vega:OTTHUMG00000022512;protein_accession:AAA35662.1;protein_accession:AAC41932.1;protein_accession:AAD13982.1;protein_accession:AAH71754.1;protein_accession:AAH74950.1;protein_accession:AAP37943.1;protein_accession:AAQ09090.1;protein_accession:AAZ23548.1;protein_accession:ABK41936.1;protein…
44916337	IL-1 alpha -<> IL1A	expression regulation	Pubmed 2007:17214636;	The C/T polymorphism at position -889 of the <b>IL1A</b> gene influences <b>interleukin-1alpha</b> expression, with the T allele inducing higher expression.[Pubmed 2007:17214636];	197367	Protein	IL-1 alpha	Hematopoietin-1;IL-1 alpha;IL1A;IL1F1;Interleukin-1 alpha;il -1alpha;il 1 a;il 1 alpha;il 1-alpha;il 1a;il 1alpha;il- 1 alpha;il- 1alpha;il-1 a;il-1-a;il-1-alpha;IL-1A;il-i alpha;il-i-alpha;il-ialpha;IL1;il1 a;il1 alpha;il1-a;IL1-ALPHA;il1alpha;interleukin -1 alpha;interleukin -1alpha;interleukin 1 alpha;interleukin 1-a;interleukin 1-alpha;interleukin 1a;interleukin 1alpha;interleukin i alpha;int…	SWISSPROT_AC:P01583;SWISSPROT_ID:IL1A_HUMAN;EMBL:AC112235;EMBL:AF536338;EMBL:AK314850;EMBL:BC013142;EMBL:BN000002;EMBL:BT007014;EMBL:CH471217;EMBL:CR457414;EMBL:M15329;EMBL:M28983;EMBL:X02531;EMBL:X02851;EMBL:X03833;EMBL:X56086;RefSeq:NP_000566.3;ProteinModelPortal:P01583;STRING:9606.ENSP00000263339;SWISSPROT_AC_OLD:Q53QF9;SWISSPROT_AC_OLD:Q7RU02;SMR:P01583;GeneID:3552;KEGG:hsa:3552;PIR:A23385;eg…	4342708	Gene	IL1A	IL-1A;IL1;IL1-ALPHA;IL1A;IL1F1;interleukin 1 alpha;Hematopoietin-1;il -1alpha;il 1 a;il 1 alpha;il 1-alpha;il 1a;il 1alpha;il- 1 alpha;il- 1alpha;il-1 a;IL-1 alpha;il-1-a;il-1-alpha;il-i alpha;il-i-alpha;il-ialpha;il1 a;il1 alpha;il1-a;il1alpha;interleukin -1 alpha;interleukin -1alpha;interleukin 1-a;interleukin 1-alpha;interleukin 1a;interleukin 1alpha;interleukin i alpha;interleukin- 1 alpha;in…	SWISSPROT_AC:P01583;SWISSPROT_ID:IL1A_HUMAN;GeneID:3552;Ensembl:ENSG00000115008;HGNC:HGNC:5991;MIM:147760;Vega:OTTHUMG00000131315;protein_accession:AAA59133.1;protein_accession:AAH13142.1;protein_accession:AAM96189.1;protein_accession:AAP35660.1;protein_accession:AAX93054.1;protein_accession:ABM81601.1;protein_accession:ABM84782.1;protein_accession:BAG37367.1;protein_accession:CAA26371.1;protein_…
44973870	IL-15 -<> CXCL10	expression regulation	Pubmed 2014:24586509;	Moreover, the <b>CXCL10</b> expression in intestinal tissues was upregulated by poly I:C and <b>IL-15</b>.[Pubmed 2014:24586509];	197294	Protein	IL-15	IL-15;IL15;Interleukin-15;il -15;il 15;il i-v;il- 15;interleukin 15;interleukin-1 5;interleukin15;	SWISSPROT_AC:P40933;SWISSPROT_ID:IL15_HUMAN;EMBL:AF031167;EMBL:AK122993;EMBL:AK290619;EMBL:AY720442;EMBL:BC018149;EMBL:BC100961;EMBL:BC100962;EMBL:BC100963;EMBL:CH471056;EMBL:CR541980;EMBL:CR542007;EMBL:U14407;EMBL:X91233;EMBL:X94222;EMBL:X94223;EMBL:Y09908;EMBL:Z38000;RefSeq:NP_000576.1;RefSeq:NP_751915.1;ProteinModelPortal:P40933;STRING:9606.ENSP00000296545;SWISSPROT_AC_OLD:D3DNZ2;SWISSPROT_AC_…	4342770	Gene	CXCL10	C-X-C motif chemokine ligand 10;C7;crg-2;CXCL10;gIP-10;IFI10;INP10;IP-10;mob-1;SCYB10;10 kDa interferon gamma-induced protein;10-kda interferon gamma-induced protein;C-X-C motif chemokine 10;c-x-c motif ligand 10 chemokine;c-x-c-motif chemokine 10;chemokine c-x-c motif ligand 10;chemokine c-x-c-motif ligand 10;cxcl 10;cxcl-10;CXL10;gamma ip-10;gamma-ip-10;Gamma-IP10;gammaip-10;ip 10;ip- 10;ip--10…	SWISSPROT_AC:P02778;SWISSPROT_ID:CXL10_HUMAN;GeneID:3627;Ensembl:ENSG00000169245;HGNC:HGNC:10637;MIM:147310;Vega:OTTHUMG00000160887;protein_accession:AAH10954.1;protein_accession:ABM83712.1;protein_accession:ABM87032.1;protein_accession:CAA26370.1;protein_accession:EAX05772.1;protein_accession:EAX05773.1;protein_accession:NP_001556.2;protein_accession:P02778.2;protein_gi:119626177;protein_gi:1196…
44999408	IL-15 --> CD40LG	expression upregulation	Pubmed 2000:10886401;	<b>IL-15</b> significantly increased the expression of <b>CD154</b> on SF and PB T cells from patients, whereas IL-2 had minimal effects.[Pubmed 2000:10886401];<b>Interleukin-15</b> up-regulates the expression of <b>CD154</b> on synovial fluid T cells.[Pubmed 2000:10886401];	197294	Protein	IL-15	IL-15;IL15;Interleukin-15;il -15;il 15;il i-v;il- 15;interleukin 15;interleukin-1 5;interleukin15;	SWISSPROT_AC:P40933;SWISSPROT_ID:IL15_HUMAN;EMBL:AF031167;EMBL:AK122993;EMBL:AK290619;EMBL:AY720442;EMBL:BC018149;EMBL:BC100961;EMBL:BC100962;EMBL:BC100963;EMBL:CH471056;EMBL:CR541980;EMBL:CR542007;EMBL:U14407;EMBL:X91233;EMBL:X94222;EMBL:X94223;EMBL:Y09908;EMBL:Z38000;RefSeq:NP_000576.1;RefSeq:NP_751915.1;ProteinModelPortal:P40933;STRING:9606.ENSP00000296545;SWISSPROT_AC_OLD:D3DNZ2;SWISSPROT_AC_…	4340589	Gene	CD40LG	CD154;CD40 ligand;CD40L;CD40LG;gp39;hCD40L;HIGM1;IGM;IMD3;T-BAM;TNFSF5;TRAP;cd 154;cd 40 l;cd 40 ligand;cd-40 ligand;cd-40-ligand;CD154 antigen;cd40 l;cd40 ligand--an;CD40-L;cd40-ligand;cd40l g;cd40l--an;higm type 1;higm-1;l-cd40;ligand cd40;ligand of cd40;ligand--cd40;ligand-cd40;t cell antigen gp39;T-cell antigen Gp39;TNF-related activation protein;Tumor necrosis factor ligand superfamily membe…	SWISSPROT_AC:P29965;SWISSPROT_ID:CD40L_HUMAN;GeneID:959;Ensembl:ENSG00000102245;HGNC:HGNC:11935;MIM:300386;Vega:OTTHUMG00000022512;protein_accession:AAA35662.1;protein_accession:AAC41932.1;protein_accession:AAD13982.1;protein_accession:AAH71754.1;protein_accession:AAH74950.1;protein_accession:AAP37943.1;protein_accession:AAQ09090.1;protein_accession:AAZ23548.1;protein_accession:ABK41936.1;protein…
45028182	IL-15 --> CXCL10	expression upregulation	Pubmed 2014:24586509;	Moreover, the <b>CXCL10</b> expression in intestinal tissues was upregulated by poly I:C and <b>IL-15</b>.[Pubmed 2014:24586509];	197294	Protein	IL-15	IL-15;IL15;Interleukin-15;il -15;il 15;il i-v;il- 15;interleukin 15;interleukin-1 5;interleukin15;	SWISSPROT_AC:P40933;SWISSPROT_ID:IL15_HUMAN;EMBL:AF031167;EMBL:AK122993;EMBL:AK290619;EMBL:AY720442;EMBL:BC018149;EMBL:BC100961;EMBL:BC100962;EMBL:BC100963;EMBL:CH471056;EMBL:CR541980;EMBL:CR542007;EMBL:U14407;EMBL:X91233;EMBL:X94222;EMBL:X94223;EMBL:Y09908;EMBL:Z38000;RefSeq:NP_000576.1;RefSeq:NP_751915.1;ProteinModelPortal:P40933;STRING:9606.ENSP00000296545;SWISSPROT_AC_OLD:D3DNZ2;SWISSPROT_AC_…	4342770	Gene	CXCL10	C-X-C motif chemokine ligand 10;C7;crg-2;CXCL10;gIP-10;IFI10;INP10;IP-10;mob-1;SCYB10;10 kDa interferon gamma-induced protein;10-kda interferon gamma-induced protein;C-X-C motif chemokine 10;c-x-c motif ligand 10 chemokine;c-x-c-motif chemokine 10;chemokine c-x-c motif ligand 10;chemokine c-x-c-motif ligand 10;cxcl 10;cxcl-10;CXL10;gamma ip-10;gamma-ip-10;Gamma-IP10;gammaip-10;ip 10;ip- 10;ip--10…	SWISSPROT_AC:P02778;SWISSPROT_ID:CXL10_HUMAN;GeneID:3627;Ensembl:ENSG00000169245;HGNC:HGNC:10637;MIM:147310;Vega:OTTHUMG00000160887;protein_accession:AAH10954.1;protein_accession:ABM83712.1;protein_accession:ABM87032.1;protein_accession:CAA26370.1;protein_accession:EAX05772.1;protein_accession:EAX05773.1;protein_accession:NP_001556.2;protein_accession:P02778.2;protein_gi:119626177;protein_gi:1196…
47697569	TLR2 -<> IP-10	transport regulation	Pubmed 2009:19447045;	Down-regulation of <b>TLR2</b> and TLR4 abrogates HG-induced <b>IP-10</b> release via NF-kappaB inhibition.[Pubmed 2009:19447045];	490593	Protein	TLR2	CD282 antigen;TIL4;TLR2;Toll-like receptor 2;Toll/interleukin-1 receptor-like protein 4;CD282;receptor 2-toll-like;toll like receptor 2;toll like receptor ii;toll like receptor-2;toll-like receptor -2;toll-like receptor type 2;toll-like receptor-2;toll-like receptor2;toll-like-receptor 2;toll-like-receptor-2;toll-like-receptor2;	SWISSPROT_AC:O60603;SWISSPROT_ID:TLR2_HUMAN;EMBL:AB445624;EMBL:AF051152;EMBL:AF502291;EMBL:BC033756;EMBL:CH471056;EMBL:DQ012265;EMBL:DQ012266;EMBL:DQ012267;EMBL:DQ012268;EMBL:DQ012269;EMBL:DQ012270;EMBL:DQ012271;EMBL:U88878;RefSeq:NP_001305716.1;RefSeq:NP_001305718.1;RefSeq:NP_001305719.1;RefSeq:NP_001305720.1;RefSeq:NP_001305722.1;RefSeq:NP_001305724.1;RefSeq:NP_001305725.1;RefSeq:NP_003255.2;Re…	86038	Protein	IP-10	10 kDa interferon gamma-induced protein;C-X-C motif chemokine 10;CXCL10;CXL10;Gamma-IP10;INP10;IP-10;SCYB10;Small-inducible cytokine B10;10-kda interferon gamma-induced protein;C-X-C motif chemokine ligand 10;c-x-c motif ligand 10 chemokine;c-x-c-motif chemokine 10;C7;chemokine c-x-c motif ligand 10;chemokine c-x-c-motif ligand 10;crg-2;cxcl 10;cxcl-10;gamma ip-10;gamma-ip-10;gammaip-10;gIP-10;IF…	SWISSPROT_AC:P02778;SWISSPROT_ID:CXL10_HUMAN;EMBL:BC010954;EMBL:X02530;RefSeq:NP_001556.2;ProteinModelPortal:P02778;STRING:9606.ENSP00000305651;SWISSPROT_AC_OLD:Q96QJ5;SMR:P02778;GeneID:3627;KEGG:hsa:3627;PIR:A03243;eggNOG:ENOG410J1VC;eggNOG:ENOG410ZTJK;UniGene:Hs.632586;GO:GO:0005102;GO:GO:0005576;GO:GO:0005615;GO:GO:0006935;GO:GO:0006954;GO:GO:0006955;GO:GO:0007165;GO:GO:0007166;GO:GO:0007186;G…
100201958	STAT3 -- IL-13	interaction	innatedb:649467;innatedb allergy:649467;		461696	Protein	STAT3	Acute-phase response factor;APRF;Signal transducer and activator of transcription 3;STAT3;acute phase response factor;acute-phase response of factor;ADMIO;ADMIO1;HIES;stat 3;stat-3;	SWISSPROT_AC:P40763;SWISSPROT_ID:STAT3_HUMAN;EMBL:AC087691;EMBL:AF029311;EMBL:AJ012463;EMBL:AK291933;EMBL:AY572796;EMBL:BC000627;EMBL:BC014482;EMBL:CH471152;EMBL:JB252046;EMBL:L29277;RefSeq:NP_003141.2;RefSeq:NP_644805.1;RefSeq:NP_998827.1;RefSeq:XP_005257673.2;RefSeq:XP_005257674.2;RefSeq:XP_011523447.1;RefSeq:XP_011523448.1;RefSeq:XP_016880461.1;RefSeq:XP_016880464.1;ProteinModelPortal:P40763;S…	197279	Protein	IL-13	IL-13;IL13;Interleukin-13;NC30;il -13;il 13;il- 13;il-1 3;il1-3;interleukin 13;interleukin-1 3;interleukin13;nc 30;nc-30;p 600;p-600;P600;	SWISSPROT_AC:P35225;SWISSPROT_ID:IL13_HUMAN;EMBL:AC004039;EMBL:AF043334;EMBL:AF377331;EMBL:BC096139;EMBL:L06801;EMBL:U10307;EMBL:U31120;EMBL:X69079;RefSeq:NP_002179.2;ProteinModelPortal:P35225;STRING:9606.ENSP00000304915;SWISSPROT_AC_OLD:O43644;SWISSPROT_AC_OLD:Q4VB52;SWISSPROT_AC_OLD:Q9UDC7;SMR:P35225;GeneID:3596;KEGG:hsa:3596;PIR:I38060;eggNOG:ENOG410JCI3;eggNOG:ENOG4111BX2;UniGene:Hs.845;GO:GO…
100202910	IL-15 -- APP	interaction	innatedb:1634980;innatedb allergy:1634980;		197294	Protein	IL-15	IL-15;IL15;Interleukin-15;il -15;il 15;il i-v;il- 15;interleukin 15;interleukin-1 5;interleukin15;	SWISSPROT_AC:P40933;SWISSPROT_ID:IL15_HUMAN;EMBL:AF031167;EMBL:AK122993;EMBL:AK290619;EMBL:AY720442;EMBL:BC018149;EMBL:BC100961;EMBL:BC100962;EMBL:BC100963;EMBL:CH471056;EMBL:CR541980;EMBL:CR542007;EMBL:U14407;EMBL:X91233;EMBL:X94222;EMBL:X94223;EMBL:Y09908;EMBL:Z38000;RefSeq:NP_000576.1;RefSeq:NP_751915.1;ProteinModelPortal:P40933;STRING:9606.ENSP00000296545;SWISSPROT_AC_OLD:D3DNZ2;SWISSPROT_AC_…	3186	Protein	APP	A4;ABPP;AD1;Alzheimer disease amyloid protein;Amyloid beta A4 protein;Amyloid precursor protein;APP;APPI;Beta-amyloid precursor protein;Cerebral vascular amyloid peptide;CVAP;PN-II;PreA4;Protease nexin-II;AAA;aaa-type;ABETA;alzheimer's disease amyloid protein;amyloid b precursor protein;amyloid b protein precursor;amyloid b-protein precursor;amyloid beta precursor protein;amyloid beta protein a4;…	SWISSPROT_AC:P05067;SWISSPROT_ID:A4_HUMAN;EMBL:AB066441;EMBL:AF282245;EMBL:AK295621;EMBL:AK312326;EMBL:AP001439;EMBL:AP001440;EMBL:AP001441;EMBL:AP001442;EMBL:AP001443;EMBL:AY919674;EMBL:BC004369;EMBL:BC065529;EMBL:CH471079;EMBL:D87675;EMBL:M15532;EMBL:M15533;EMBL:M16765;EMBL:M18734;EMBL:M24546;EMBL:M24547;EMBL:M28373;EMBL:M29269;EMBL:M29270;EMBL:M33112;EMBL:M34862;EMBL:M34863;EMBL:M34864;EMBL:M3…
