# Supplementary material for: Search for New Candidate Genes Involved in the Comorbidity of Asthma and Hypertension Based on Automatic Analysis of Scientific Literature
Source: publisher site journal article supplement (doi:10.1515/jib-2018-0054), 2018-12-01
Supplement: Supplementary file 3 [file Appendix_3.xlsx]

## Sheet: traning gene set
Gene Ontology Biological Process	Count	%	Genes	List Total	Pop Hits	Pop Total	Fold Enrichment	p-value	p-value FDR corrected
GO:0001666~response to hypoxia	23	11.386138613861387	4313, 133, 6648, 3291, 4843, 9370, 6347, 847, 768, 283, 1909, 7412, 3162, 7040, 10911, 7422, 1803, 3952, 4524, 6532, 5327, 1471, 7054	200	172	16792	11.227209302325582	8.560021050877605E-17	1.9984e-13
GO:0042493~response to drug	27	13.366336633663368	5970, 847, 1392, 768, 3383, 335, 7040, 3458, 4860, 5728, 6647, 596, 6648, 3291, 5743, 26, 5468, 10628, 10911, 4524, 6532, 6915, 3565, 1471, 2353, 3586, 3569	200	304	16792	7.456973684210527	2.8031795351269482E-15	4.86278e-12
GO:0071222~cellular response to lipopolysaccharide	18	8.91089108910891	4360, 7035, 958, 4843, 5970, 7124, 6347, 5054, 3383, 3458, 2950, 7099, 6915, 4790, 3586, 3569, 3576, 114548	200	113	16792	13.374159292035397	2.103202350645362E-14	3.67373e-11
GO:0045429~positive regulation of nitric oxide biosynthetic process	13	6.435643564356436	3458, 6648, 7099, 5743, 1956, 7124, 3553, 3630, 2099, 3569, 207, 1906, 3383	200	43	16792	25.383255813953486	6.117590530677E-14	1.07092e-10
GO:0045471~response to ethanol	17	8.415841584158416	5728, 6647, 9370, 6347, 847, 1392, 3383, 7412, 1728, 2950, 3952, 410, 6915, 3565, 7054, 551, 3558	200	105	16792	13.59352380952381	1.0243371446445893E-13	1.7939e-10
GO:0032355~response to estradiol	16	7.920792079207921	7035, 920, 5728, 5743, 2099, 847, 1728, 10628, 7040, 2950, 3952, 6532, 1490, 1471, 1544, 7054	200	91	16792	14.762197802197804	1.8700861417393258E-13	3.27294e-10
GO:0008217~regulation of blood pressure	14	6.9306930693069315	4846, 6647, 6648, 4852, 5743, 1113, 5468, 1906, 1909, 3162, 10911, 3952, 1636, 5443	200	65	16792	18.08369230769231	5.869548311520416E-13	1.02754e-09
GO:0007568~aging	19	9.405940594059405	5728, 6647, 133, 4353, 5970, 6347, 2729, 847, 207, 3779, 7412, 56729, 1728, 7040, 1490, 7076, 2353, 3586, 3569	200	165	16792	9.668121212121212	1.048700928477559E-12	1.83585e-09
GO:0006954~inflammatory response	25	12.376237623762377	5970, 3606, 7124, 6401, 6347, 1392, 7040, 6356, 3553, 114548, 3576, 958, 5743, 9734, 1401, 207, 7098, 7099, 6696, 6915, 3567, 2353, 4790, 3586, 3569	200	379	16792	5.538258575197889	2.2684660689888946E-11	3.97112e-08
GO:0043066~negative regulation of apoptotic process	27	13.366336633663368	7291, 5728, 596, 6648, 4318, 4353, 2641, 1956, 213, 5970, 3479, 2729, 847, 207, 7157, 1728, 2950, 7052, 7422, 3952, 3565, 7076, 4790, 3586, 3569, 3558, 551	200	455	16792	4.982241758241758	3.1006134630669676E-11	5.42785e-08
GO:0051384~response to glucocorticoid	12	5.9405940594059405	133, 596, 3291, 5730, 5069, 5743, 7124, 9370, 189, 3586, 3569, 3557	200	65	16792	15.500307692307691	2.514071353200104E-10	4.40107e-07
GO:0002576~platelet degranulation	14	6.9306930693069315	6647, 213, 801, 7450, 3082, 2335, 3479, 5054, 335, 2, 7040, 7422, 7076, 5265	200	103	16792	11.412038834951456	2.58223468498804E-10	4.5204e-07
GO:0008284~positive regulation of cell proliferation	26	12.871287128712872	133, 1956, 5970, 3082, 2335, 3479, 1392, 3458, 7040, 7422, 1803, 367, 3630, 59067, 3558, 551, 5728, 596, 1906, 356, 3952, 7432, 1490, 7076, 1471, 3569	200	466	16792	4.684463519313305	2.918854949497909E-10	5.10968e-07
GO:0010628~positive regulation of gene expression	20	9.900990099009901	7291, 7124, 1401, 2335, 1392, 7157, 3458, 7040, 7098, 7422, 7099, 367, 6532, 1490, 3553, 3630, 72, 8856, 3569, 551	200	262	16792	6.409160305343512	3.2169560586790556E-10	5.63152e-07
GO:0007584~response to nutrient	12	5.9405940594059405	717, 7412, 5728, 1728, 6532, 9370, 6915, 410, 3565, 2729, 5468, 335	200	74	16792	13.615135135135136	1.0699925364883084E-9	1.8731e-06
GO:0007267~cell-cell signaling	19	9.405940594059405	5241, 133, 3606, 10850, 8743, 1906, 154, 151, 356, 367, 1490, 627, 3553, 3630, 3586, 2028, 5443, 551, 3558	200	254	16792	6.280472440944882	1.389633949243123E-9	2.43266e-06
GO:0048661~positive regulation of smooth muscle cell proliferation	11	5.445544554455446	3162, 56729, 7052, 5743, 1956, 3606, 7124, 3479, 3569, 207, 1906	200	60	16792	15.392666666666667	1.9629971522518767E-9	3.43637e-06
GO:0006955~immune response	23	11.386138613861387	958, 920, 3606, 7124, 10850, 6347, 8743, 6590, 5199, 3458, 7099, 356, 6356, 4860, 3565, 3553, 3567, 3586, 59067, 3569, 3557, 3576, 3558	200	421	16792	4.586888361045131	5.9436164112854595E-9	1.04047e-05
GO:0051092~positive regulation of NF-kappaB transcription factor activity	14	6.9306930693069315	958, 5970, 7124, 847, 3383, 7040, 7098, 7099, 367, 3553, 3630, 4790, 3569, 114548	200	133	16792	8.837894736842106	6.31517115815813E-9	1.10552e-05
GO:0007565~female pregnancy	12	5.9405940594059405	7040, 151, 133, 596, 3291, 5069, 3952, 3565, 5617, 259, 2353, 1392	200	89	16792	11.320449438202248	8.009522566224864E-9	1.40213e-05
GO:0001525~angiogenesis	17	8.415841584158416	5728, 4313, 4846, 5743, 3606, 2335, 6347, 5054, 283, 3953, 3162, 7422, 889, 3952, 1490, 2028, 3576	200	223	16792	6.400538116591929	9.95117728117052E-9	1.74203e-05
GO:0045944~positive regulation of transcription from RNA polymerase II promoter	35	17.326732673267326	7291, 1956, 5970, 3606, 3082, 7124, 3479, 196, 2099, 154, 7040, 3458, 7422, 367, 3553, 8856, 5443, 3558, 114548, 958, 5241, 2908, 5468, 207, 7157, 1906, 5054, 9063, 7098, 7099, 3565, 4790, 2353, 3586, 3569	200	981	16792	2.9955147808358817	1.4860568642760627E-8	2.60145e-05
GO:0014823~response to activity	9	4.455445544554455	6648, 3952, 9370, 6347, 2729, 3586, 847, 7054, 1906	200	43	16792	17.57302325581395	3.4347552619685486E-8	6.0128e-05
GO:0045909~positive regulation of vasodilation	8	3.9603960396039604	3779, 3162, 133, 4846, 10911, 1956, 4843, 3630	200	29	16792	23.161379310344827	3.6965914886073775E-8	6.47116e-05
GO:0050731~positive regulation of peptidyl-tyrosine phosphorylation	11	5.445544554455446	920, 7040, 7422, 9370, 3082, 3479, 3630, 3567, 3569, 7157, 3383	200	82	16792	11.262926829268292	4.443663485719436E-8	7.77897e-05
GO:0045080~positive regulation of chemokine biosynthetic process	6	2.9702970297029703	3162, 3458, 7098, 7124, 3565, 3553	200	10	16792	50.376	5.33848720098707E-8	9.34542e-05
GO:0043200~response to amino acid	8	3.9603960396039604	2950, 5970, 4524, 1490, 6347, 3569, 1906, 3383	200	31	16792	21.66709677419355	6.104215016674284E-8	0.000106859
GO:0031663~lipopolysaccharide-mediated signaling pathway	8	3.9603960396039604	7040, 4846, 7099, 3606, 7124, 6347, 3553, 207	200	32	16792	20.990000000000002	7.735400364193656E-8	0.000135414
GO:0032496~response to lipopolysaccharide	14	6.9306930693069315	958, 133, 6648, 5743, 4353, 6401, 6590, 1906, 7412, 7099, 356, 2353, 1544, 7054	200	164	16792	7.167317073170732	7.884036327838823E-8	0.000138016
GO:0043491~protein kinase B signaling	8	3.9603960396039604	958, 7040, 5728, 7124, 6347, 3479, 3553, 207	200	33	16792	20.353939393939392	9.72001418656915E-8	0.000170156
GO:1902042~negative regulation of extrinsic apoptotic signaling pathway via death domain receptors	8	3.9603960396039604	3162, 4846, 2876, 356, 3082, 8743, 5054, 3383	200	33	16792	20.353939393939392	9.72001418656915E-8	0.000170156
GO:0045766~positive regulation of angiogenesis	12	5.9405940594059405	7291, 3162, 133, 4846, 7422, 10911, 6356, 6915, 3082, 3553, 5054, 3576	200	115	16792	8.76104347826087	1.1938579765993318E-7	0.000208994
GO:0035902~response to immobilization stress	7	3.4653465346534658	7040, 6648, 2353, 1544, 5468, 1392, 7054	200	21	16792	27.986666666666668	1.2020277204180047E-7	0.000210424
GO:0098869~cellular oxidant detoxification	10	4.9504950495049505	3240, 2950, 2876, 2952, 213, 5743, 8288, 847, 373156, 348	200	70	16792	11.994285714285716	1.340435579197975E-7	0.000234653
GO:0071260~cellular response to mechanical stimulus	10	4.9504950495049505	958, 7040, 7098, 7099, 5743, 1956, 2729, 3553, 4790, 207	200	71	16792	11.825352112676057	1.519427902638499E-7	0.000265987
GO:0050729~positive regulation of inflammatory response	10	4.9504950495049505	7052, 7098, 6356, 7099, 1956, 3606, 6347, 59067, 5054, 3558	200	73	16792	11.5013698630137	1.9406657580449988E-7	0.000339728
GO:0071456~cellular response to hypoxia	11	5.445544554455446	3779, 7291, 5728, 3162, 596, 7422, 5743, 207, 7157, 1906, 3383	200	96	16792	9.620416666666667	2.029524546940783E-7	0.000355283
GO:0050829~defense response to Gram-negative bacterium	9	4.455445544554455	920, 133, 7099, 4852, 4843, 7432, 1113, 3569, 5054	200	55	16792	13.738909090909091	2.553759529073569E-7	0.000447054
GO:0001878~response to yeast	6	2.9702970297029703	133, 4852, 4353, 7432, 3569, 283	200	13	16792	38.75076923076923	2.6485330038548925E-7	0.000463645
GO:0006953~acute-phase response	8	3.9603960396039604	3240, 1401, 2335, 4153, 3630, 3569, 3557, 5265	200	39	16792	17.222564102564103	3.295227136056287E-7	0.000576853
GO:0051091~positive regulation of sequence-specific DNA binding transcription factor activity	11	5.445544554455446	5728, 7124, 3565, 3553, 3567, 2099, 3586, 5468, 3569, 207, 1906	200	105	16792	8.795809523809524	4.732890791058801E-7	0.000828525
GO:0042102~positive regulation of T cell proliferation	9	4.455445544554455	920, 7412, 3458, 3952, 4860, 3565, 3553, 59067, 3569	200	60	16792	12.594	5.101561477771426E-7	0.000893063
GO:0010629~negative regulation of gene expression	12	5.9405940594059405	7040, 3458, 5241, 4843, 1636, 7124, 1490, 4790, 2099, 1392, 207, 6098	200	137	16792	7.354160583941606	7.082751786810893E-7	0.00123988
GO:0045893~positive regulation of transcription, DNA-templated	22	10.891089108910892	30009, 55729, 5970, 7124, 3479, 2099, 196, 5468, 5901, 7157, 9063, 7040, 367, 3565, 3553, 4790, 3567, 2353, 3586, 8856, 3569, 3664	200	515	16792	3.586640776699029	8.657235189148443E-7	0.0015155
GO:0032868~response to insulin	9	4.455445544554455	56729, 133, 3291, 3952, 5970, 8743, 3586, 847, 3569	200	67	16792	11.27820895522388	1.2115241443718848E-6	0.00212084
GO:0002674~negative regulation of acute inflammatory response	5	2.4752475247524752	2950, 3565, 3630, 5468, 114548	200	8	16792	52.47500000000001	1.2908462295646524E-6	0.0022597
GO:0048304~positive regulation of isotype switching to IgG isotypes	5	2.4752475247524752	958, 3458, 30009, 3565, 3558	200	8	16792	52.47500000000001	1.2908462295646524E-6	0.0022597
GO:0044267~cellular protein metabolic process	11	5.445544554455446	4313, 354, 4312, 5069, 9445, 5045, 3479, 5617, 3630, 1471, 335	200	118	16792	7.826779661016949	1.39938965306751E-6	0.00244971
GO:0035690~cellular response to drug	9	4.455445544554455	7098, 1956, 4843, 9370, 6347, 3553, 7054, 7157, 1906	200	69	16792	10.951304347826088	1.522022594274723E-6	0.00266438
GO:0071347~cellular response to interleukin-1	9	4.455445544554455	7035, 6356, 5970, 6347, 4790, 3569, 1906, 3383, 3576	200	71	16792	10.642816901408452	1.8978371553638121E-6	0.00332226
GO:0042542~response to hydrogen peroxide	8	3.9603960396039604	10628, 3162, 3240, 6647, 596, 6648, 2876, 847	200	51	16792	13.170196078431372	2.1994671012668334E-6	0.00385026
GO:0032930~positive regulation of superoxide anion generation	5	2.4752475247524752	7040, 6647, 2950, 1956, 1401	200	9	16792	46.64444444444445	2.3019618070830344E-6	0.00402968
GO:0022617~extracellular matrix disassembly	9	4.455445544554455	2, 4313, 4312, 6696, 4318, 2335, 7076, 5045, 3818	200	76	16792	9.942631578947369	3.197725228033777E-6	0.00559771
GO:0042346~positive regulation of NF-kappaB import into nucleus	6	2.9702970297029703	7098, 7099, 5743, 3606, 7124, 3553	200	21	16792	23.988571428571426	3.876479842024218E-6	0.00678585
GO:0030890~positive regulation of B cell proliferation	7	3.4653465346534658	958, 596, 7099, 3565, 3567, 59067, 3558	200	39	16792	15.069743589743592	6.051182779475414E-6	0.0105925
GO:0006979~response to oxidative stress	10	4.9504950495049505	3162, 2876, 5743, 4353, 1956, 8288, 4153, 2729, 207, 348	200	110	16792	7.632727272727274	6.365941833401105E-6	0.0111435
GO:0007165~signal transduction	33	16.33663366336634	920, 133, 1956, 2641, 3479, 8743, 6347, 2099, 1392, 6356, 3925, 367, 2245, 3553, 59067, 51517, 8856, 5443, 3576, 551, 114548, 4360, 5241, 2908, 5468, 5901, 207, 5921, 1909, 7098, 356, 3952, 4790	200	1161	16792	2.386459948320413	6.408802669468544E-6	0.0112185
GO:0050830~defense response to Gram-positive bacterium	9	4.455445544554455	133, 4852, 7432, 7124, 1401, 4153, 1113, 3569, 283	200	85	16792	8.889882352941175	7.451787736154123E-6	0.0130441
GO:0070374~positive regulation of ERK1 and ERK2 cascade	12	5.9405940594059405	7040, 5728, 7422, 6356, 7099, 1956, 2641, 7124, 1490, 6347, 3569, 3383	200	175	16792	5.757257142857143	7.755010094675332E-6	0.0135749
GO:0019430~removal of superoxide radicals	5	2.4752475247524752	1728, 6647, 4846, 6648, 4353	200	12	16792	34.983333333333334	8.794162849257238E-6	0.0153937
GO:0007566~embryo implantation	7	3.4653465346534658	4313, 6647, 6696, 4318, 5743, 3553, 1471	200	42	16792	13.993333333333334	9.446085025516412E-6	0.0165348
GO:0032757~positive regulation of interleukin-8 production	6	2.9702970297029703	7098, 7099, 7124, 9370, 3553, 5054	200	26	16792	19.375384615384615	1.1941610683562355E-5	0.0209026
GO:0050999~regulation of nitric-oxide synthase activity	6	2.9702970297029703	4846, 3952, 1956, 801, 3553, 207	200	26	16792	19.375384615384615	1.1941610683562355E-5	0.0209026
GO:0043065~positive regulation of apoptotic process	15	7.425742574257425	6647, 133, 5743, 7124, 8743, 207, 7157, 7040, 10628, 3162, 7052, 7098, 356, 2245, 3569	200	300	16792	4.198	1.4181843391950727E-5	0.0248235
GO:0035729~cellular response to hepatocyte growth factor stimulus	5	2.4752475247524752	5970, 3082, 2729, 3586, 3569	200	14	16792	29.985714285714288	1.7455740492173216E-5	0.0305532
GO:0033138~positive regulation of peptidyl-serine phosphorylation	8	3.9603960396039604	7040, 596, 7422, 2641, 7124, 3569, 207, 551	200	70	16792	9.595428571428572	1.883424200064001E-5	0.0329656
GO:0001934~positive regulation of protein phosphorylation	10	4.9504950495049505	958, 7040, 7422, 4318, 1956, 7124, 9370, 3553, 1392, 207	200	127	16792	6.611023622047245	2.0438351585626105E-5	0.0357728
GO:0009408~response to heat	7	3.4653465346534658	6647, 4846, 6347, 2729, 3479, 3569, 207	200	48	16792	12.244166666666668	2.0830283356375E-5	0.0364587
GO:0051044~positive regulation of membrane protein ectodomain proteolysis	5	2.4752475247524752	3458, 7124, 5045, 3553, 348	200	15	16792	27.986666666666668	2.3582857680416606E-5	0.0412755

## Sheet: top 100
Gene Ontology Biological Process	Count	%	Genes	List Total	Pop Hits	Pop Total	Fold Enrichment	p-value	p-value FDR corrected
GO:0006954~inflammatory response	29	28.999999999999996	3627, 3605, 54106, 3600, 12, 4615, 728, 727, 6354, 3559, 4780, 959, 3596, 51561, 6279, 301, 5742, 5196, 3552, 7133, 50616, 4982, 6403, 6387, 355, 718, 5473, 6367, 7097	100	379	16792	12.848759894459102	2.328845432489053E-23	3.86633e-20
GO:0006955~immune response	26	26.0	1437, 3627, 4049, 942, 3562, 3605, 5008, 3600, 948, 728, 3559, 959, 3596, 5196, 3552, 7133, 50616, 4982, 6387, 355, 718, 5473, 6367, 4088, 7097, 1493	100	421	16792	10.370356294536817	1.4506928392813496E-18	2.40843e-15
GO:0007165~signal transduction	35	35.0	4049, 3627, 2056, 4306, 6774, 7295, 3560, 285, 3600, 4615, 728, 4254, 2247, 6354, 10135, 9970, 5228, 5328, 5159, 3596, 301, 3091, 2100, 834, 4982, 6387, 355, 718, 3164, 6367, 3667, 7097, 6778, 7056, 5594	100	1161	16792	5.062187769164512	1.0394335519337566E-15	1.65423e-12
GO:0032496~response to lipopolysaccharide	17	17.0	338, 3596, 4049, 3627, 2056, 6279, 5196, 1312, 834, 4982, 6403, 728, 355, 1991, 5473, 7097, 7056	100	164	16792	17.406341463414634	1.863908661913194E-15	3.13083e-12
GO:0007267~cell-cell signaling	19	19.0	3627, 4049, 3596, 942, 7295, 3562, 3605, 2100, 50616, 3600, 7042, 183, 374, 4803, 6354, 6367, 10135, 5228, 3589	100	254	16792	12.560944881889764	7.893100363579892E-15	1.30895e-11
GO:0008284~positive regulation of cell proliferation	23	23.0	1437, 1910, 3627, 2056, 2147, 6774, 942, 3562, 2321, 3371, 3791, 5008, 3600, 7042, 2247, 374, 10135, 3667, 3643, 5228, 3589, 5159, 5594	100	466	16792	8.287896995708154	2.752780055615994E-14	4.57079e-11
GO:0001666~response to hypoxia	15	15.0	4049, 2056, 4878, 4842, 3091, 857, 285, 834, 5465, 7042, 6387, 4088, 7097, 5228, 5328	100	172	16792	14.644186046511626	1.4655453290689484E-12	2.433e-09
GO:0010628~positive regulation of gene expression	16	16.0	1437, 338, 5599, 6774, 4179, 5196, 3371, 3091, 54106, 3552, 857, 7042, 4803, 4088, 7097, 4780	100	262	16792	10.25465648854962	3.543802206572736E-11	5.88339e-08
GO:0002576~platelet degranulation	11	11.0	7042, 6403, 5473, 2316, 5196, 197, 7078, 12, 5340, 351, 948	100	103	16792	17.933203883495146	4.785059956505065E-10	7.94412e-07
GO:0042127~regulation of cell proliferation	13	13.0	355, 3627, 183, 301, 185, 5473, 5742, 3371, 5196, 6778, 7133, 4982, 5328	100	185	16792	11.799783783783784	8.972170243916463E-10	1.48955e-06
GO:0045766~positive regulation of angiogenesis	11	11.0	728, 727, 718, 2247, 3091, 2321, 3791, 3552, 285, 4780, 5228	100	115	16792	16.06191304347826	1.4266252739868936E-9	2.36847e-06
GO:0050900~leukocyte migration	11	11.0	6403, 338, 728, 2147, 1277, 857, 285, 5624, 960, 3684, 7056	100	122	16792	15.14032786885246	2.5499037719109664E-9	4.23333e-06
GO:0071260~cellular response to mechanical stimulus	9	9.0	4615, 355, 3596, 5599, 183, 4878, 1277, 3659, 834	100	71	16792	21.285633802816903	8.584014109880542E-9	1.42511e-05
GO:0043066~negative regulation of apoptotic process	17	17.0	959, 1910, 5599, 6774, 301, 3560, 2316, 3791, 960, 5624, 5055, 4615, 355, 8837, 4803, 4088, 5159	100	455	16792	6.273934065934067	9.323855113706412E-9	1.54794e-05
GO:0043410~positive regulation of MAPK cascade	9	9.0	355, 3486, 2321, 5008, 3791, 3643, 7133, 4982, 3589	100	81	16792	18.657777777777778	2.4728037589013447E-8	4.10533e-05
GO:0010744~positive regulation of macrophage derived foam cell differentiation	6	6.0	1437, 338, 183, 185, 5196, 948	100	16	16792	62.97	2.6688372437283323E-8	4.43078e-05
GO:0045944~positive regulation of transcription from RNA polymerase II promoter	23	23.0	3627, 51561, 6774, 3605, 4842, 3091, 5196, 5008, 54106, 3552, 351, 5465, 3164, 3456, 2247, 4088, 10135, 3659, 9970, 7097, 6778, 4780, 3589	100	981	16792	3.936962283384302	4.4521618288251556E-8	7.39144e-05
GO:0050729~positive regulation of inflammatory response	8	8.0	51561, 183, 6279, 185, 6354, 54106, 7097, 3600	100	73	16792	18.40219178082192	2.3680635830873037E-7	0.000393143
GO:0042060~wound healing	8	8.0	7042, 5465, 6279, 2247, 4088, 3371, 5159, 5055	100	80	16792	16.792	4.4644644126209337E-7	0.000741184
GO:0006935~chemotaxis	9	9.0	6387, 3627, 728, 727, 2247, 6354, 6367, 5594, 5328	100	122	16792	12.387540983606556	6.073640525414542E-7	0.00100834
GO:2000379~positive regulation of reactive oxygen species metabolic process	6	6.0	2147, 183, 185, 4780, 5159, 948	100	30	16792	33.583999999999996	8.155987050487388E-7	0.00135404
GO:0006915~apoptotic process	16	16.0	4049, 2056, 6279, 3605, 3552, 834, 4615, 355, 728, 3164, 8837, 3486, 3659, 7097, 3559, 5594	100	567	16792	4.7384832451499115	1.1037989886122994E-6	0.0018325
GO:0045893~positive regulation of transcription, DNA-templated	15	15.0	2056, 6774, 942, 4842, 3091, 2100, 5465, 183, 2247, 1277, 4088, 3659, 3643, 999, 5594	100	515	16792	4.890873786407767	1.9009297895953395E-6	0.00315586
GO:0014068~positive regulation of phosphatidylinositol 3-kinase signaling	7	7.000000000000001	7042, 6403, 2147, 183, 2321, 3791, 5159	100	65	16792	18.08369230769231	2.2475380250878926E-6	0.00373128
GO:0006953~acute-phase response	6	6.0	2056, 2147, 6774, 197, 50616, 12	100	39	16792	25.833846153846153	3.1597025425015177E-6	0.00524558
GO:0045740~positive regulation of DNA replication	6	6.0	1437, 2056, 4254, 3562, 374, 3643	100	42	16792	23.988571428571426	4.603535398670069E-6	0.00764248
GO:0007166~cell surface receptor signaling pathway	11	11.0	1910, 4615, 3627, 727, 2147, 183, 3456, 301, 3605, 3559, 948	100	274	16792	6.7413138686131395	4.933050101831878E-6	0.0081895
GO:0022617~extracellular matrix disassembly	7	7.000000000000001	4314, 1991, 4319, 4317, 960, 999, 5340	100	76	16792	15.466315789473686	5.64617628932829E-6	0.00937332
GO:0007568~aging	9	9.0	1910, 2056, 183, 6774, 2247, 942, 7133, 4780, 3600	100	165	16792	9.159272727272727	5.8789511768710225E-6	0.00975974
GO:0032760~positive regulation of tumor necrosis factor production	6	6.0	4615, 51561, 5196, 54106, 7097, 948	100	47	16792	21.43659574468085	8.10993036278984E-6	0.0134632
GO:0051781~positive regulation of cell division	6	6.0	7042, 2247, 5473, 5008, 3552, 5228	100	47	16792	21.43659574468085	8.10993036278984E-6	0.0134632
GO:0050731~positive regulation of peptidyl-tyrosine phosphorylation	7	7.000000000000001	4254, 183, 3562, 5008, 960, 3589, 948	100	82	16792	14.334634146341465	8.78977666539589E-6	0.0145917
GO:0070374~positive regulation of ERK1 and ERK2 cascade	9	9.0	728, 2056, 2247, 6354, 6367, 3791, 960, 5159, 948	100	175	16792	8.635885714285715	9.060075619251683E-6	0.0150404
GO:0032733~positive regulation of interleukin-10 production	5	5.0	959, 51561, 4179, 54106, 7097	100	23	16792	36.50434782608696	9.23519006615875E-6	0.0153311
GO:0042493~response to drug	11	11.0	7042, 595, 4049, 6774, 301, 942, 1277, 1312, 5228, 4982, 999	100	304	16792	6.076052631578947	1.2257944245946234E-5	0.0203486
GO:0007596~blood coagulation	9	9.0	2147, 3456, 1277, 3659, 5624, 7056, 5340, 948, 5328	100	184	16792	8.213478260869564	1.3062413785476835E-5	0.0216839
GO:0030335~positive regulation of cell migration	9	9.0	6354, 1277, 4088, 2321, 3791, 3643, 5594, 5159, 5328	100	184	16792	8.213478260869564	1.3062413785476835E-5	0.0216839
GO:0032735~positive regulation of interleukin-12 production	5	5.0	959, 51561, 54106, 7097, 948	100	25	16792	33.584	1.3074276632769404E-5	0.0217036
GO:0010575~positive regulation of vascular endothelial growth factor production	5	5.0	728, 727, 718, 3091, 3552	100	27	16792	31.0962962962963	1.7975264035888056E-5	0.0298382
GO:0030198~extracellular matrix organization	9	9.0	2247, 1277, 3371, 3791, 960, 3684, 4982, 999, 351	100	196	16792	7.710612244897959	2.063317601811883E-5	0.0342495
GO:0000165~MAPK cascade	10	10.0	1437, 4254, 3562, 2247, 3560, 3667, 857, 3559, 5594, 5159	100	262	16792	6.409160305343512	2.4323920285279505E-5	0.0403747
GO:0048661~positive regulation of smooth muscle cell proliferation	6	6.0	4615, 3596, 1991, 2247, 10135, 5159	100	60	16792	16.791999999999998	2.7178483568278125E-5	0.0451119

## Sheet: common
Gene Ontology Biological Process	Traning gene set p-value FDR corrected	Top100 p-value FDR corrected
GO:0001666~response to hypoxia	1.9984e-13	2.433e-09
GO:0042493~response to drug	4.86278e-12	0.0203486
GO:0007568~aging	1.83585e-09	0.00975974
GO:0006954~inflammatory response	3.97112e-08	3.86633e-20
GO:0043066~negative regulation of apoptotic process	5.42785e-08	1.54794e-05
GO:0002576~platelet degranulation	4.5204e-07	7.94412e-07
GO:0008284~positive regulation of cell proliferation	5.10968e-07	4.57079e-11
GO:0010628~positive regulation of gene expression	5.63152e-07	5.88339e-08
GO:0007267~cell-cell signaling	2.43266e-06	1.30895e-11
GO:0048661~positive regulation of smooth muscle cell proliferation	3.43637e-06	0.0451119
GO:0006955~immune response	1.04047e-05	2.40843e-15
GO:0045944~positive regulation of transcription from RNA polymerase II promoter	2.60145e-05	7.39144e-05
GO:0050731~positive regulation of peptidyl-tyrosine phosphorylation	7.77897e-05	0.0145917
GO:0032496~response to lipopolysaccharide	0.000138016	3.13083e-12
GO:0045766~positive regulation of angiogenesis	0.000208994	2.36847e-06
GO:0071260~cellular response to mechanical stimulus	0.000265987	1.42511e-05
GO:0050729~positive regulation of inflammatory response	0.000339728	0.000393143
GO:0006953~acute-phase response	0.000576853	0.00524558
GO:0045893~positive regulation of transcription, DNA-templated	0.0015155	0.00315586
GO:0022617~extracellular matrix disassembly	0.00559771	0.00937332
GO:0007165~signal transduction	0.0112185	1.65423e-12
GO:0070374~positive regulation of ERK1 and ERK2 cascade	0.0135749	0.0150404
